# Supplementary material for: On the move: spatial ecology and habitat use of red fox in the Trans-Himalayan cold desert
Source: PeerJ. 2022 Sep 15;10:e13967. doi: 10.7717/peerj.13967 (PMC9482768; doi:10.7717/peerj.13967)
Supplement: Supplemental Information 5 [file peerj-10-13967-s005.xls]

## Sheet: Sheet1
Device Name	Sex	Date & Time [GMT]	Latitude	Longitude	Altitude	Temp [C]	Long	Lat_UTM
F1	F	10-27-18 7:45 AM	34.4776	76.5017	3204.98	21.5	637902	3.81613e+06
F1	F	10-27-18 8:00 AM	34.4771	76.5017	3178.94	20.5	637903	3.81608e+06
F1	F	10-27-18 8:15 AM	34.4772	76.5016	3216.43	21.5	637896	3.81609e+06
F1	F	10-27-18 8:30 AM	34.4772	76.5017	3209.67	20.5	637900	3.8161e+06
F1	F	10-27-18 8:45 AM	34.4772	76.5016	3217	20.5	637896	3.81609e+06
F1	F	10-27-18 9:00 AM	34.4772	76.5017	3202.86	20.5	637903	3.8161e+06
F1	F	10-27-18 9:15 AM	34.4773	76.5016	3211.04	21	637897	3.8161e+06
F1	F	10-27-18 9:30 AM	34.4772	76.5017	3213.81	20.5	637902	3.8161e+06
F1	F	10-27-18 9:45 AM	34.4774	76.5017	3199.22	20	637903	3.81611e+06
F1	F	10-27-18 10:00 AM	34.4772	76.5017	3203.01	21.5	637901	3.8161e+06
F1	F	10-27-18 12:15 PM	34.4772	76.5016	3207.36	26.5	637899	3.81609e+06
F1	F	10-27-18 12:30 PM	34.4772	76.5016	3201.65	30.5	637898	3.81609e+06
F1	F	10-27-18 12:45 PM	34.4771	76.5016	3217.98	27	637898	3.81609e+06
F1	F	10-27-18 1:00 PM	34.4772	76.5016	3205.33	25.5	637899	3.81609e+06
F1	F	10-27-18 1:15 PM	34.4771	76.5015	3240.32	24	637883	3.81608e+06
F1	F	10-27-18 1:30 PM	34.4772	76.5016	3198.82	26.5	637898	3.81609e+06
F1	F	10-27-18 1:45 PM	34.4772	76.5017	3204.3	22	637909	3.81609e+06
F1	F	10-27-18 2:00 PM	34.4772	76.5017	3210.8	18.5	637900	3.81609e+06
F1	F	10-27-18 2:15 PM	34.4763	76.5026	3166.37	10	637993	3.81599e+06
F1	F	10-27-18 2:31 PM	34.4755	76.5031	3223.67	9	638037	3.8159e+06
F1	F	10-27-18 2:45 PM	34.4754	76.5032	3220.31	14.5	638041	3.8159e+06
F1	F	10-27-18 3:00 PM	34.4755	76.5031	3190.27	20.5	638034	3.8159e+06
F1	F	10-28-18 2:16 PM	34.4752	76.501	-0.36	17	637843	3.81587e+06
F1	F	10-28-18 3:01 PM	34.4971	76.4912	0.1	17.5	636903	3.81829e+06
F1	F	10-28-18 6:01 PM	34.4719	76.503	3243.92	23.5	638029	3.81551e+06
F1	F	10-28-18 6:15 PM	34.4719	76.5031	3242.73	18	638044	3.81551e+06
F1	F	10-28-18 7:00 PM	34.4719	76.5006	3324.67	12.5	637813	3.8155e+06
F1	F	10-28-18 7:15 PM	34.4722	76.4984	3264.26	6	637607	3.81553e+06
F1	F	10-28-18 7:30 PM	34.4732	76.4952	3328.55	3.5	637315	3.81565e+06
F1	F	10-28-18 7:45 PM	34.4733	76.4951	3273.81	7	637302	3.81566e+06
F1	F	10-28-18 8:00 PM	34.4733	76.4953	3373.08	13	637322	3.81565e+06
F1	F	10-28-18 8:31 PM	34.4976	76.4958	-0.51	28	637333	3.81834e+06
F1	F	10-28-18 8:46 PM	34.4733	76.4952	3355.75	30.5	637312	3.81565e+06
F1	F	10-28-18 9:01 PM	34.4734	76.4952	3350.37	32	637311	3.81566e+06
F1	F	10-28-18 9:46 PM	34.4913	76.4701	0.21	32.5	634978	3.81762e+06
F1	F	10-28-18 10:31 PM	34.5402	76.4597	0.11	29.5	633950	3.82302e+06
F1	F	10-28-18 10:46 PM	34.5142	76.4775	0.14	27	635626	3.82017e+06
F1	F	10-28-18 11:16 PM	34.4733	76.4952	3344.43	26	637309	3.81565e+06
F1	F	10-28-18 11:31 PM	34.4929	76.4818	-0.09	26	636054	3.81781e+06
F1	F	10-28-18 11:46 PM	34.6726	76.5498	-0.32	26.5	641985	3.83783e+06
F1	F	10-29-18 1:16 AM	34.4744	76.4919	2688.83	31.5	637011	3.81576e+06
F1	F	10-29-18 1:45 AM	34.4529	76.4789	0.12	35	635851	3.81336e+06
F1	F	10-29-18 2:01 AM	34.4731	76.4999	0.15	35.5	637745	3.81563e+06
F1	F	10-31-18 1:16 PM	34.4722	76.504	3231.6	9	638127	3.81555e+06
F1	F	10-31-18 1:30 PM	34.4722	76.5039	3226	11	638112	3.81555e+06
F1	F	10-31-18 1:45 PM	34.4733	76.503	3235.87	11	638033	3.81566e+06
F1	F	10-31-18 2:00 PM	34.476	76.502	3207.7	9	637934	3.81596e+06
F1	F	10-31-18 2:15 PM	34.4761	76.5003	3213.27	7.5	637781	3.81597e+06
F1	F	10-31-18 2:31 PM	34.4784	76.5003	3201.75	8	637772	3.81622e+06
F1	F	10-31-18 2:45 PM	34.4786	76.4988	3216.6	6	637634	3.81625e+06
F1	F	10-31-18 3:00 PM	34.4794	76.4954	3195.68	5	637319	3.81633e+06
F1	F	10-31-18 3:15 PM	34.48	76.4944	3250.31	7.5	637232	3.81639e+06
F1	F	10-31-18 3:30 PM	34.4802	76.4941	3230.74	14.5	637201	3.81642e+06
F1	F	10-31-18 3:45 PM	34.4802	76.4941	3220.46	20.5	637199	3.81642e+06
F1	F	10-31-18 4:00 PM	34.4802	76.494	3217.7	20	637194	3.81642e+06
F1	F	10-31-18 4:15 PM	34.4804	76.4943	3265.64	21	637217	3.81644e+06
F1	F	10-31-18 4:30 PM	34.4809	76.495	3227.03	15	637279	3.81649e+06
F1	F	10-31-18 4:45 PM	34.4797	76.4957	3191.57	8.5	637353	3.81636e+06
F1	F	10-31-18 5:00 PM	34.4799	76.4957	3219.99	7	637350	3.81638e+06
F1	F	10-31-18 5:15 PM	34.4784	76.4973	3221.45	3.5	637501	3.81622e+06
F1	F	10-31-18 5:30 PM	34.478	76.5001	3251.74	2	637760	3.81617e+06
F1	F	10-31-18 5:45 PM	34.4772	76.5018	3219.66	3	637917	3.81609e+06
F1	F	10-31-18 6:00 PM	34.4753	76.5018	3236.57	1.5	637921	3.81588e+06
F1	F	10-31-18 6:15 PM	34.4751	76.5033	3250.58	1.5	638052	3.81586e+06
F1	F	10-31-18 6:30 PM	34.4731	76.5033	3284.38	1.5	638062	3.81563e+06
F1	F	10-31-18 6:45 PM	34.4725	76.504	3253.98	3	638122	3.81557e+06
F1	F	10-31-18 7:00 PM	34.4723	76.5037	3190.41	6.5	638099	3.81555e+06
F1	F	2018-01-11 03:16:00	34.4731	76.5036	3219.53	31.5	638090	3.81564e+06
F1	F	2018-01-11 03:30:00	34.4745	76.5032	3229.71	24.5	638051	3.81579e+06
F1	F	2018-01-11 03:45:00	34.4745	76.5032	3218.98	24	638042	3.8158e+06
F1	F	2018-01-11 04:00:00	34.4745	76.5032	3219.11	26.5	638043	3.8158e+06
F1	F	2018-01-11 04:15:00	34.4745	76.5031	3219.84	27	638038	3.81579e+06
F1	F	2018-01-11 04:30:00	34.4745	76.5032	3216.11	28	638051	3.8158e+06
F1	F	2018-01-11 04:45:00	34.4745	76.5032	3220.58	32	638042	3.8158e+06
F1	F	2018-01-11 05:01:00	34.4746	76.5031	3322.28	35	638041	3.81581e+06
F1	F	2018-01-11 07:45:00	34.4745	76.503	3268.77	30.5	638028	3.81579e+06
F1	F	2018-01-11 08:00:00	34.4745	76.5031	3207.52	30.5	638038	3.81579e+06
F1	F	2018-01-11 08:15:00	34.4745	76.5032	3216.15	29.5	638042	3.81579e+06
F1	F	2018-01-11 08:30:00	34.4745	76.5031	3220.12	38	638039	3.81579e+06
F1	F	2018-01-11 08:45:00	34.4744	76.5031	3227.25	35.5	638039	3.81579e+06
F1	F	2018-01-11 09:00:00	34.4747	76.5031	3184.39	36	638038	3.81581e+06
F1	F	2018-01-11 09:15:00	34.4745	76.5031	3206.2	34	638039	3.8158e+06
F1	F	2018-01-11 09:30:00	34.4745	76.5032	3202.54	31	638045	3.8158e+06
F1	F	2018-01-11 09:45:00	34.4745	76.5032	3215.62	30	638043	3.8158e+06
F1	F	2018-01-11 10:00:00	34.4746	76.5033	3178.16	27.5	638054	3.8158e+06
F1	F	2018-01-11 10:15:00	34.4745	76.5032	3222.94	30.5	638042	3.8158e+06
F1	F	2018-01-11 10:30:00	34.4745	76.5032	3215.14	29.5	638046	3.81579e+06
F1	F	2018-01-11 10:45:00	34.4744	76.5032	3211.02	28.5	638051	3.81579e+06
F1	F	2018-01-11 11:00:00	34.4745	76.5032	3212.98	27.5	638042	3.81579e+06
F1	F	2018-01-11 11:15:00	34.4744	76.5032	3202.4	27.5	638047	3.81578e+06
F1	F	2018-01-11 11:30:00	34.4745	76.5032	3198.73	27.5	638043	3.81579e+06
F1	F	2018-01-11 11:45:00	34.4745	76.5032	3198.15	30	638046	3.81579e+06
F1	F	2018-01-11 12:00:00	34.4746	76.5031	3189.46	32.5	638034	3.8158e+06
F1	F	2018-01-11 12:15:00	34.4745	76.5032	3201.19	33.5	638042	3.81579e+06
F1	F	2018-01-11 12:30:00	34.4764	76.5026	3171.87	19.5	637985	3.816e+06
F1	F	2018-01-11 12:45:00	34.477	76.5013	3200.29	12.5	637872	3.81607e+06
F1	F	2018-01-11 13:00:00	34.477	76.5018	3198.25	9.5	637914	3.81607e+06
F1	F	2018-01-11 13:15:00	34.4765	76.5	3202.15	9	637748	3.81601e+06
F1	F	2018-01-11 13:30:00	34.4759	76.5018	3224.51	8.5	637920	3.81595e+06
F1	F	2018-01-11 13:45:00	34.4746	76.5023	3223.34	8.5	637960	3.8158e+06
F1	F	2018-01-11 14:00:00	34.4746	76.5022	3230.68	17	637953	3.8158e+06
F1	F	2018-01-11 14:15:00	34.4728	76.5044	3199.03	14.5	638160	3.81561e+06
F1	F	2018-01-11 14:31:00	34.4718	76.5033	3267.36	10.5	638061	3.8155e+06
F1	F	2018-01-11 14:45:00	34.4701	76.4989	3310.06	9	637655	3.8153e+06
F1	F	2018-01-11 15:00:00	34.4732	76.4982	3250.78	8	637591	3.81565e+06
F1	F	2018-01-11 15:15:00	34.476	76.4985	3217.22	8	637610	3.81595e+06
F1	F	2018-01-11 15:30:00	34.477	76.4981	3208.64	8.5	637572	3.81607e+06
F1	F	2018-01-11 15:45:00	34.4777	76.4978	3194.08	8.5	637544	3.81615e+06
F1	F	2018-01-11 16:00:00	34.4781	76.4971	3219.04	8.5	637481	3.81618e+06
F1	F	2018-01-11 16:15:00	34.479	76.4967	3184.67	7.5	637438	3.81629e+06
F1	F	2018-01-11 16:30:00	34.479	76.4967	3204.01	16	637440	3.81629e+06
F1	F	2018-01-11 16:45:00	34.4791	76.4967	3191.53	23	637446	3.81629e+06
F1	F	2018-01-11 17:00:00	34.479	76.4969	3220.13	20.5	637457	3.81629e+06
F1	F	2018-01-11 17:15:00	34.4806	76.4959	3195.4	12.5	637369	3.81646e+06
F1	F	2018-01-11 17:31:00	34.4791	76.4954	3210.43	9.5	637326	3.8163e+06
F1	F	2018-01-11 17:45:00	34.4786	76.5006	3202.35	7.5	637798	3.81624e+06
F1	F	2018-01-11 18:00:00	34.4768	76.5012	3219.37	7	637860	3.81605e+06
F1	F	2018-01-11 18:15:00	34.4755	76.502	3206.93	7	637932	3.8159e+06
F1	F	2018-01-11 18:30:00	34.4756	76.5019	3232.42	6.5	637929	3.81592e+06
F1	F	2018-01-11 18:46:00	34.4755	76.5014	3207.4	6.5	637881	3.81591e+06
F1	F	2018-01-11 19:00:00	34.4751	76.5007	3207.13	6	637818	3.81586e+06
F1	F	2018-01-11 19:15:00	34.4773	76.5004	3204.77	6.5	637784	3.8161e+06
F1	F	2018-01-11 19:30:00	34.4785	76.5004	3215.24	6.5	637785	3.81623e+06
F1	F	2018-01-11 19:45:00	34.4779	76.4993	3215.32	6.5	637681	3.81616e+06
F1	F	2018-01-11 20:00:00	34.478	76.5008	3202.64	6.5	637816	3.81618e+06
F1	F	2018-01-11 20:15:00	34.4764	76.4992	3215.92	6.5	637676	3.816e+06
F1	F	2018-01-11 20:30:00	34.4762	76.4993	3215.79	9	637685	3.81598e+06
F1	F	2018-01-11 20:45:00	34.4762	76.4993	3221.5	13	637686	3.81598e+06
F1	F	2018-01-11 21:00:00	34.4762	76.4992	3196.92	15.5	637673	3.81598e+06
F1	F	2018-01-11 21:15:00	34.4762	76.4993	3214.68	16.5	637682	3.81598e+06
F1	F	2018-01-11 21:30:00	34.4758	76.5008	3209.61	12	637828	3.81594e+06
F1	F	2018-01-11 21:46:00	34.4759	76.5022	3182.66	8	637957	3.81595e+06
F1	F	2018-01-11 22:00:00	34.4748	76.5028	3237.06	5	638012	3.81582e+06
F1	F	2018-01-11 22:15:00	34.4729	76.5039	3234.14	4	638109	3.81562e+06
F1	F	2018-01-11 22:31:00	34.473	76.5041	3207.75	3	638135	3.81563e+06
F1	F	2018-01-11 22:46:00	34.4727	76.5005	2890.64	6	637801	3.81559e+06
F1	F	2018-01-11 23:01:00	34.4728	76.5043	2776.71	5	638146	3.81561e+06
F1	F	2018-01-11 23:31:00	34.467	76.5123	0.11	24	638891	3.81498e+06
F1	F	2018-01-11 23:46:00	34.4734	76.5023	3264.91	26	637963	3.81567e+06
F1	F	2018-02-11 00:15:00	34.5084	76.6162	0.32	30.5	648365	3.81971e+06
F1	F	2018-02-11 00:30:00	34.4733	76.5019	3279.7	25.5	637933	3.81566e+06
F1	F	2018-02-11 00:45:00	34.4717	76.5008	3303.53	12.5	637827	3.81548e+06
F1	F	2018-02-11 01:00:00	34.4714	76.5004	3324.1	7.5	637794	3.81545e+06
F1	F	2018-02-11 01:15:00	34.472	76.5011	3366.63	5	637859	3.81552e+06
F1	F	2018-02-11 01:30:00	34.4722	76.5031	3448.82	4.5	638041	3.81554e+06
F1	F	2018-02-11 01:45:00	34.4724	76.5034	3425.48	4.5	638073	3.81556e+06
F1	F	2018-02-11 02:00:00	34.4746	76.5044	3448.1	6.5	638156	3.8158e+06
F1	F	2018-02-11 02:16:00	34.4735	76.5035	2637.66	13	638078	3.81568e+06
F1	F	2018-02-11 02:31:00	34.4752	76.5028	3117.76	16.5	638005	3.81587e+06
F1	F	2018-02-11 02:45:00	34.4751	76.5029	3211.48	16	638019	3.81586e+06
F1	F	2018-02-11 03:00:00	34.4752	76.5029	3203.24	23.5	638014	3.81587e+06
F1	F	2018-02-11 03:15:00	34.4752	76.5028	3199.41	26.5	638004	3.81587e+06
F1	F	2018-02-11 03:31:00	34.4748	76.5029	3056.05	28	638016	3.81583e+06
F1	F	2018-02-11 03:45:00	34.4752	76.5028	3216.52	28.5	638008	3.81587e+06
F1	F	2018-02-11 04:00:00	34.475	76.5029	3204.33	26	638015	3.81585e+06
F1	F	2018-02-11 04:15:00	34.4753	76.5029	3211.86	24.5	638017	3.81588e+06
F1	F	2018-02-11 04:30:00	34.4752	76.5029	3213.62	24.5	638015	3.81587e+06
F1	F	2018-02-11 04:45:00	34.4752	76.5029	3217.77	24	638014	3.81588e+06
F1	F	2018-02-11 05:00:00	34.4751	76.5028	3177.95	22.5	638013	3.81586e+06
F1	F	2018-02-11 05:15:00	34.4752	76.5029	3218.3	22.5	638013	3.81587e+06
F1	F	2018-02-11 05:30:00	34.4751	76.5029	3204.75	23	638015	3.81586e+06
F1	F	2018-02-11 05:45:00	34.4752	76.5029	3208.04	23	638018	3.81587e+06
F1	F	2018-02-11 06:01:00	34.4752	76.5028	3202.77	24	638013	3.81587e+06
F1	F	2018-02-11 06:15:00	34.4752	76.5029	3216.16	24.5	638017	3.81587e+06
F1	F	2018-02-11 06:30:00	34.4752	76.5029	3218.8	30.5	638018	3.81587e+06
F1	F	2018-02-11 06:45:00	34.475	76.5028	3257.46	31.5	638006	3.81585e+06
F1	F	2018-02-11 07:00:00	34.4752	76.5028	3221.89	31.5	638012	3.81587e+06
F1	F	2018-02-11 07:15:00	34.4752	76.5027	3210.26	30.5	638004	3.81587e+06
F1	F	2018-02-11 07:30:00	34.4751	76.5027	3217.93	30.5	637999	3.81587e+06
F1	F	2018-02-11 07:45:00	34.4753	76.5029	3201.39	29.5	638016	3.81588e+06
F1	F	2018-02-11 08:00:00	34.4752	76.5029	3219.61	30	638015	3.81587e+06
F1	F	2018-02-11 08:15:00	34.4752	76.5027	3227.46	30.5	638000	3.81587e+06
F1	F	2018-02-11 08:30:00	34.4751	76.5028	3204.58	27.5	638010	3.81586e+06
F1	F	2018-02-11 08:45:00	34.4752	76.5028	3224.39	26.5	638012	3.81587e+06
F1	F	2018-02-11 09:00:00	34.4752	76.5029	3209.61	25.5	638014	3.81587e+06
F1	F	2018-02-11 09:15:00	34.4753	76.5027	3206.78	22.5	638001	3.81588e+06
F1	F	2018-02-11 09:30:00	34.4751	76.5026	3228.17	26	637988	3.81586e+06
F1	F	2018-02-11 09:45:00	34.4751	76.5026	3222.5	28	637988	3.81586e+06
F1	F	2018-02-11 10:00:00	34.475	76.5025	3218.56	28.5	637982	3.81585e+06
F1	F	2018-02-11 10:15:00	34.4751	76.5028	3250.23	28.5	638006	3.81586e+06
F1	F	2018-02-11 10:30:00	34.4753	76.5027	3209.76	26.5	637999	3.81588e+06
F1	F	2018-02-11 10:45:00	34.4752	76.5027	3209.95	26	637998	3.81587e+06
F1	F	2018-02-11 11:00:00	34.4752	76.5027	3212.95	25.5	638003	3.81588e+06
F1	F	2018-02-11 11:15:00	34.4752	76.5027	3210.69	25	638003	3.81587e+06
F1	F	2018-02-11 11:30:00	34.4752	76.5026	3210.93	24.5	637990	3.81587e+06
F1	F	2018-02-11 11:45:00	34.4751	76.5027	3224.78	25	637998	3.81587e+06
F1	F	2018-02-11 12:00:00	34.4752	76.5028	3219.5	30	638006	3.81587e+06
F1	F	2018-02-11 12:15:00	34.4752	76.5027	3213.99	30	638003	3.81587e+06
F1	F	2018-02-11 12:30:00	34.4752	76.5027	3222.21	29.5	638002	3.81588e+06
F1	F	2018-02-11 12:45:00	34.4763	76.502	3199.83	17	637930	3.81599e+06
F1	F	2018-02-11 13:00:00	34.475	76.5015	3212.58	9.5	637890	3.81585e+06
F1	F	2018-02-11 13:15:00	34.4725	76.5037	3220.69	5.5	638100	3.81558e+06
F1	F	2018-02-11 13:30:00	34.475	76.502	3216.89	4	637938	3.81585e+06
F1	F	2018-02-11 13:45:00	34.4768	76.5016	3216.02	3.5	637897	3.81605e+06
F1	F	2018-02-11 14:00:00	34.4787	76.4981	3202.78	2.5	637569	3.81625e+06
F1	F	2018-02-11 14:15:00	34.4773	76.4982	3203.59	3	637580	3.8161e+06
F1	F	2018-02-11 14:30:00	34.4795	76.4965	3189.6	2.5	637426	3.81634e+06
F1	F	2018-02-11 14:45:00	34.4808	76.4946	3234.72	2.5	637243	3.81648e+06
F1	F	2018-02-11 15:00:00	34.4787	76.497	3175.4	2.5	637471	3.81626e+06
F1	F	2018-02-11 15:15:00	34.4774	76.5007	3199.79	2	637813	3.81612e+06
F1	F	2018-02-11 15:30:00	34.4761	76.5023	3191.85	5	637957	3.81597e+06
F1	F	2018-02-11 15:45:00	34.4751	76.5036	3210.6	3	638081	3.81586e+06
F1	F	2018-02-11 16:00:00	34.4758	76.503	3181.7	2.5	638026	3.81594e+06
F1	F	2018-02-11 16:15:00	34.4763	76.5016	3209.11	2	637894	3.81599e+06
F1	F	2018-02-11 16:30:00	34.4779	76.5017	3197.55	2	637903	3.81617e+06
F1	F	2018-02-11 16:45:00	34.4768	76.5025	3244.45	2	637980	3.81605e+06
F1	F	2018-02-11 17:00:00	34.4774	76.5026	3222.04	2	637984	3.81611e+06
F1	F	2018-02-11 17:15:00	34.4781	76.5	3194.01	3	637748	3.81619e+06
F1	F	2018-02-11 17:30:00	34.4762	76.4984	3223.01	3	637600	3.81597e+06
F1	F	2018-02-11 17:45:00	34.476	76.4994	3231.76	2.5	637697	3.81595e+06
F1	F	2018-02-11 18:00:00	34.4758	76.4996	3243.3	6	637716	3.81594e+06
F1	F	2018-02-11 18:15:00	34.4759	76.4996	3232.8	10	637711	3.81594e+06
F1	F	2018-02-11 18:30:00	34.4827	76.5073	3205.5	9	638407	3.81671e+06
F1	F	2018-02-11 18:45:00	34.4736	76.5026	3247.04	5.5	637993	3.8157e+06
F1	F	2018-02-11 19:00:00	34.472	76.5043	3331.47	6.5	638154	3.81552e+06
F1	F	2018-02-11 19:15:00	34.4719	76.5035	3221.74	11.5	638081	3.81551e+06
F1	F	2018-02-11 19:31:00	34.4721	76.5034	3217.62	15.5	638071	3.81552e+06
F1	F	2018-02-11 20:31:00	34.4735	76.5014	-0.37	24.5	637878	3.81568e+06
F1	F	2018-02-11 23:00:00	34.4724	76.5041	3226.3	12.5	638130	3.81556e+06
F1	F	2018-02-11 23:15:00	34.4743	76.503	3225.12	6	638030	3.81578e+06
F1	F	2018-02-11 23:30:00	34.4744	76.5032	3242.29	5.5	638044	3.81578e+06
F1	F	2018-02-11 23:45:00	34.4936	76.4805	-0.34	7.5	635926	3.81788e+06
F1	F	2018-03-11	34.4749	76.5035	3208.21	5	638077	3.81583e+06
F1	F	2018-03-11 00:15:00	34.4775	76.5001	3205.34	2.5	637755	3.81613e+06
F1	F	2018-03-11 00:30:00	34.4779	76.5013	3339.78	2.5	637866	3.81617e+06
F1	F	2018-03-11 00:45:00	34.476	76.5025	3207.45	2.5	637976	3.81596e+06
F1	F	2018-03-11 01:00:00	34.4752	76.5028	3206.33	4.5	638008	3.81587e+06
F1	F	2018-03-11 01:15:00	34.4751	76.5029	3201.16	8.5	638016	3.81586e+06
F1	F	2018-03-11 01:30:00	34.4751	76.5029	3203.38	12.5	638014	3.81586e+06
F1	F	2018-03-11 01:45:00	34.4751	76.5029	3204.74	14	638017	3.81587e+06
F1	F	2018-03-11 02:00:00	34.4751	76.5028	3195.66	15.5	638011	3.81586e+06
F1	F	2018-03-11 02:15:00	34.4752	76.5028	3219.44	17	638010	3.81587e+06
F1	F	2018-03-11 02:30:00	34.4752	76.5028	3199.33	19.5	638012	3.81587e+06
F1	F	2018-03-11 02:45:00	34.4752	76.5028	3206.36	19.5	638012	3.81587e+06
F1	F	2018-03-11 03:00:00	34.4752	76.5029	3210.69	18.5	638016	3.81587e+06
F1	F	2018-03-11 03:15:00	34.4752	76.503	3217.32	18	638024	3.81587e+06
F1	F	2018-03-11 03:30:00	34.4751	76.503	3251.29	18	638027	3.81587e+06
F1	F	2018-03-11 03:45:00	34.4751	76.5031	3245.13	22.5	638032	3.81586e+06
F1	F	2018-03-11 04:00:00	34.4751	76.5032	3273.3	26.5	638047	3.81586e+06
F1	F	2018-03-11 04:16:00	34.4751	76.5029	3208.48	30.5	638014	3.81586e+06
F1	F	2018-03-11 04:30:00	34.4753	76.503	3200.5	30.5	638026	3.81588e+06
F1	F	2018-03-11 04:45:00	34.4751	76.5028	3222.27	29.5	638013	3.81586e+06
F1	F	2018-03-11 05:00:00	34.4753	76.5028	3225.72	28.5	638008	3.81588e+06
F1	F	2018-03-11 05:15:00	34.4753	76.503	3156.56	26.5	638026	3.81588e+06
F1	F	2018-03-11 05:30:00	34.4751	76.5029	3214.59	25.5	638021	3.81586e+06
F1	F	2018-03-11 05:45:00	34.4752	76.5029	3215.41	24	638015	3.81587e+06
F1	F	2018-03-11 06:00:00	34.4751	76.5029	3212.01	23	638018	3.81587e+06
F1	F	2018-03-11 06:15:00	34.4752	76.5029	3202.81	23.5	638014	3.81587e+06
F1	F	2018-03-11 06:30:00	34.4752	76.5029	3205.84	23.5	638013	3.81587e+06
F1	F	2018-03-11 06:46:00	34.4752	76.5028	3182.98	23.5	638005	3.81587e+06
F1	F	2018-03-11 07:00:00	34.4751	76.5027	3179.28	24	637999	3.81586e+06
F1	F	2018-03-11 07:15:00	34.4752	76.5029	3205.88	25.5	638014	3.81587e+06
F1	F	2018-03-11 07:30:00	34.4752	76.503	3214.76	26	638025	3.81587e+06
F1	F	2018-03-11 07:45:00	34.4752	76.5029	3230.57	28	638014	3.81587e+06
F1	F	2018-03-11 08:00:00	34.4757	76.5021	3227.08	18	637941	3.81593e+06
F1	F	2018-03-11 08:15:00	34.4749	76.5017	3209.79	12.5	637904	3.81584e+06
F1	F	2018-03-11 08:30:00	34.4762	76.502	3229.91	10	637938	3.81598e+06
F1	F	2018-03-11 08:45:00	34.4748	76.502	3248.11	9	637933	3.81583e+06
F1	F	2018-03-11 09:00:00	34.4749	76.5016	3239.37	8.5	637894	3.81584e+06
F1	F	2018-03-11 09:15:00	34.4749	76.5013	3225.33	16	637875	3.81584e+06
F1	F	2018-03-11 09:30:00	34.4751	76.5016	3235.07	24.5	637894	3.81585e+06
F1	F	2018-03-11 09:45:00	34.4748	76.5014	3227.95	25	637882	3.81583e+06
F1	F	2018-03-11 10:00:00	34.4749	76.5014	3219.52	24.5	637877	3.81584e+06
F1	F	2018-03-11 10:15:00	34.4749	76.5014	3230.22	22	637882	3.81583e+06
F1	F	2018-03-11 10:30:00	34.4749	76.5014	3241.17	23.5	637881	3.81584e+06
F1	F	2018-03-11 10:45:00	34.4749	76.5014	3244.51	29.5	637883	3.81583e+06
F1	F	2018-03-11 11:00:00	34.4748	76.5014	3227.9	31.5	637884	3.81583e+06
F1	F	2018-03-11 11:15:00	34.4748	76.5015	3231.61	33	637889	3.81583e+06
F1	F	2018-03-11 11:30:00	34.4748	76.5015	3230.25	32	637886	3.81583e+06
F1	F	2018-03-11 11:45:00	34.4753	76.5016	3227.22	31	637897	3.81588e+06
F1	F	2018-03-11 12:00:00	34.4747	76.5017	3234.34	24.5	637906	3.81581e+06
F1	F	2018-03-11 12:15:00	34.4722	76.5036	3255.46	12.5	638083	3.81554e+06
F1	F	2018-03-11 12:30:00	34.472	76.5016	3312.92	8	637901	3.81552e+06
F1	F	2018-03-11 12:45:00	34.4754	76.4992	3252.68	4.5	637674	3.81588e+06
F1	F	2018-03-11 13:00:00	34.4781	76.4992	3172.48	3.5	637677	3.81619e+06
F1	F	2018-03-11 13:15:00	34.4788	76.4971	3195.28	3.5	637479	3.81626e+06
F1	F	2018-03-11 13:30:00	34.4778	76.5003	3217.98	3	637779	3.81616e+06
F1	F	2018-03-11 13:45:00	34.4764	76.5017	3201.65	2.5	637907	3.816e+06
F1	F	2018-03-11 14:01:00	34.4761	76.5021	3167.42	2.5	637942	3.81597e+06
F1	F	2018-03-11 14:15:00	34.4772	76.5004	3204.78	2.5	637781	3.81609e+06
F1	F	2018-03-11 14:30:00	34.4745	76.5026	3208.96	1.5	637993	3.8158e+06
F1	F	2018-03-11 14:45:00	34.4727	76.5047	3203.85	1.5	638185	3.8156e+06
F1	F	2018-03-11 15:00:00	34.4736	76.5039	3222.54	1.5	638111	3.8157e+06
F1	F	2018-03-11 15:15:00	34.4754	76.5045	3201.98	2	638161	3.81589e+06
F1	F	2018-03-11 15:30:00	34.4759	76.5038	3210.67	1	638102	3.81595e+06
F1	F	2018-03-11 15:45:00	34.4745	76.5051	3222.46	0.5	638224	3.8158e+06
F1	F	2018-03-11 16:00:00	34.4739	76.5034	3205.38	2	638064	3.81573e+06
F1	F	2018-03-11 16:15:00	34.4724	76.5041	3231.59	7.5	638129	3.81556e+06
F1	F	2018-03-11 16:30:00	34.4723	76.504	3234.26	9.5	638122	3.81555e+06
F1	F	2018-03-11 16:45:00	34.4724	76.5042	3218.89	11.5	638142	3.81556e+06
F1	F	2018-03-11 17:00:00	34.4708	76.5034	3292	8	638072	3.81538e+06
F1	F	2018-03-11 17:15:00	34.47	76.4982	3331.91	4	637593	3.81529e+06
F1	F	2018-03-11 17:30:00	34.4704	76.4962	3366.08	3	637412	3.81533e+06
F1	F	2018-03-11 17:45:00	34.4744	76.4982	3256.63	2	637590	3.81578e+06
F1	F	2018-03-11 18:00:00	34.4779	76.4971	3201.65	2.5	637476	3.81617e+06
F1	F	2018-03-11 18:15:00	34.4802	76.4947	3212.09	3.5	637254	3.81641e+06
F1	F	2018-03-11 18:30:00	34.4814	76.4939	3196.19	3.5	637181	3.81655e+06
F1	F	2018-03-11 18:45:00	34.4802	76.4958	3206.27	3	637356	3.81642e+06
F1	F	2018-03-11 19:00:00	34.4808	76.4946	3185.33	2.5	637250	3.81648e+06
F1	F	2018-03-11 19:15:00	34.4785	76.494	3279.05	2.5	637196	3.81623e+06
F1	F	2018-03-11 19:30:00	34.4782	76.4939	3251.13	2.5	637182	3.81619e+06
F1	F	2018-03-11 19:45:00	34.4728	76.4971	0.12	3.5	637493	3.8156e+06
F1	F	2018-03-11 20:00:00	34.4743	76.4965	3319.62	2.5	637432	3.81576e+06
F1	F	2018-03-11 20:15:00	34.4716	76.5055	3898.39	7	638265	3.81547e+06
F1	F	2018-03-11 21:16:00	34.4733	76.4962	3298.47	21	637407	3.81565e+06
F1	F	2018-03-11 21:30:00	34.4732	76.4963	3298.73	21.5	637414	3.81565e+06
F1	F	2018-03-11 21:46:00	34.4212	76.5314	-0.07	23.5	640725	3.80992e+06
F1	F	2018-03-11 22:01:00	34.4733	76.4961	3280.87	22.5	637396	3.81565e+06
F1	F	2018-03-11 23:46:00	34.4777	76.4972	3207.21	15	637492	3.81614e+06
F1	F	2018-04-11	34.478	76.5007	3193.53	7	637815	3.81617e+06
F1	F	2018-04-11 00:15:00	34.4765	76.4995	3230.46	3.5	637699	3.81601e+06
F1	F	2018-04-11 00:30:00	34.4754	76.5027	3204.36	2	638003	3.81589e+06
F1	F	2018-04-11 00:45:00	34.4751	76.5028	3149.45	3.5	638011	3.81586e+06
F1	F	2018-04-11 01:00:00	34.4751	76.5029	3208.29	9.5	638015	3.81586e+06
F1	F	2018-04-11 01:15:00	34.4752	76.5026	3177.15	13	637987	3.81587e+06
F1	F	2018-04-11 01:30:00	34.4752	76.5028	3222.88	14	638011	3.81587e+06
F1	F	2018-04-11 01:45:00	34.4752	76.5029	3220.94	13	638014	3.81587e+06
F1	F	2018-04-11 02:01:00	34.4751	76.5029	3214.66	14	638016	3.81586e+06
F1	F	2018-04-11 02:15:00	34.4751	76.5028	3220.29	22	638012	3.81586e+06
F1	F	2018-04-11 02:30:00	34.4752	76.5028	3180.07	26.5	638012	3.81588e+06
F1	F	2018-04-11 02:45:00	34.475	76.503	3223.36	28.5	638025	3.81585e+06
F1	F	2018-04-11 03:00:00	34.4749	76.503	3266.78	29.5	638026	3.81584e+06
F1	F	2018-04-11 03:15:00	34.4752	76.5028	3211.83	30.5	638013	3.81587e+06
F1	F	2018-04-11 03:30:00	34.4751	76.5029	3210.83	30	638017	3.81586e+06
F1	F	2018-04-11 03:45:00	34.4751	76.5028	3206.43	30	638007	3.81587e+06
F1	F	2018-04-11 04:00:00	34.475	76.5028	3184.62	27.5	638009	3.81585e+06
F1	F	2018-04-11 04:15:00	34.4752	76.5029	3213.46	25.5	638020	3.81587e+06
F1	F	2018-04-11 04:30:00	34.4752	76.5029	3230.84	23	638015	3.81587e+06
F1	F	2018-04-11 04:45:00	34.4752	76.5029	3251.59	22.5	638019	3.81587e+06
F1	F	2018-04-11 05:00:00	34.4752	76.5029	3219.05	21	638015	3.81587e+06
F1	F	2018-04-11 05:15:00	34.4751	76.5029	3224.48	19.5	638015	3.81586e+06
F1	F	2018-04-11 05:30:00	34.4753	76.5029	3198.26	18	638020	3.81588e+06
F1	F	2018-04-11 05:45:00	34.4752	76.5029	3212.1	18	638017	3.81587e+06
F1	F	2018-04-11 06:00:00	34.4751	76.5029	3211.22	19.5	638015	3.81586e+06
F1	F	2018-04-11 06:15:00	34.4751	76.5029	3205.92	21	638019	3.81587e+06
F1	F	2018-04-11 06:30:00	34.475	76.5029	3221.06	23	638021	3.81585e+06
F1	F	2018-04-11 06:46:00	34.4739	76.4991	2640.94	23.5	637672	3.81572e+06
F1	F	2018-04-11 07:00:00	34.4751	76.5029	3205.93	23.5	638016	3.81586e+06
F1	F	2018-04-11 07:15:00	34.4751	76.5029	3206.31	23.5	638014	3.81586e+06
F1	F	2018-04-11 07:30:00	34.4751	76.5029	3202.39	22.5	638015	3.81586e+06
F1	F	2018-04-11 07:45:00	34.4752	76.5029	3196.11	22	638014	3.81587e+06
F1	F	2018-04-11 08:00:00	34.4753	76.5025	3204.24	18	637984	3.81588e+06
F1	F	2018-04-11 08:15:00	34.4762	76.5023	3191.44	15.5	637965	3.81599e+06
F1	F	2018-04-11 08:30:00	34.4759	76.5018	3201.25	12.5	637919	3.81594e+06
F1	F	2018-04-11 08:45:00	34.4743	76.5031	3190.27	9	638034	3.81578e+06
F1	F	2018-04-11 09:00:00	34.4843	76.5006	0.33	9	637790	3.81688e+06
F1	F	2018-04-11 09:16:00	34.4724	76.5042	3228.56	10	638143	3.81557e+06
F1	F	2018-04-11 09:31:00	34.4746	76.5031	3211.39	8	638039	3.81581e+06
F1	F	2018-04-11 09:45:00	34.4746	76.5032	3211.94	16	638042	3.81581e+06
F1	F	2018-04-11 09:59:00	34.4746	76.5033	3178.71	24	638057	3.81581e+06
F1	F	2018-04-11 10:15:00	34.4748	76.5031	3215.4	25	638037	3.81583e+06
F1	F	2018-04-11 10:30:00	34.4745	76.5033	3224.31	25.5	638055	3.8158e+06
F1	F	2018-04-11 10:45:00	34.4746	76.5031	3214.85	25.5	638034	3.81581e+06
F1	F	2018-04-11 11:15:00	34.4746	76.5031	3214.22	25	638039	3.8158e+06
F1	F	2018-04-11 11:30:00	34.4745	76.5032	3169.3	24.5	638050	3.81579e+06
F1	F	2018-04-11 11:44:00	34.4745	76.5032	3213.33	25	638049	3.8158e+06
F1	F	2018-04-11 12:00:00	34.4749	76.503	3200.41	29.5	638030	3.81583e+06
F1	F	2018-04-11 12:15:00	34.4746	76.5032	3190.42	32	638042	3.8158e+06
F1	F	2018-04-11 12:46:00	34.4737	76.5023	3269.7	14.5	637964	3.8157e+06
F1	F	2018-04-11 13:00:00	34.4739	76.5004	3296.48	7	637791	3.81572e+06
F1	F	2018-04-11 13:15:00	34.4748	76.5	3293.41	4	637756	3.81582e+06
F1	F	2018-04-11 13:30:00	34.4751	76.5014	3216.82	3	637878	3.81586e+06
F1	F	2018-04-11 13:45:00	34.4749	76.5025	3214.28	2.5	637980	3.81584e+06
F1	F	2018-04-11 14:00:00	34.4752	76.501	3229.06	0.5	637846	3.81587e+06
F1	F	2018-04-11 14:15:00	34.4735	76.5	3296.39	1	637757	3.81568e+06
F1	F	2018-04-11 14:30:00	34.4742	76.4998	3304.89	1.5	637734	3.81576e+06
F1	F	2018-04-11 14:45:00	34.4711	76.5001	3340.39	1	637770	3.81542e+06
F1	F	2018-04-11 15:00:00	34.4728	76.504	3211.93	1	638118	3.81561e+06
F1	F	2018-04-11 15:15:00	34.4722	76.5039	3243.21	0.5	638115	3.81554e+06
F1	F	2018-04-11 15:30:00	34.472	76.5036	3265.5	2	638089	3.81552e+06
F1	F	2018-04-11 15:45:00	34.4745	76.5024	3222.3	1	637972	3.81579e+06
F1	F	2018-04-11 16:00:00	34.4774	76.5005	3211.77	0	637789	3.81612e+06
F1	F	2018-04-11 16:15:00	34.4772	76.4989	3203.22	0	637643	3.81609e+06
F1	F	2018-04-11 16:30:00	34.4755	76.5005	3223.13	0.5	637800	3.8159e+06
F1	F	2018-04-11 16:45:00	34.4755	76.5005	3231.53	11.5	637800	3.81591e+06
F1	F	2018-04-11 17:00:00	34.4754	76.5007	3196	20.5	637814	3.81589e+06
F1	F	2018-04-11 17:15:00	34.4753	76.5008	3169.27	26	637821	3.81588e+06
F1	F	2018-04-11 17:31:00	34.4756	76.5011	3206.75	25.5	637853	3.81592e+06
F1	F	2018-04-11 17:45:00	34.4736	76.5033	3217.97	9	638058	3.81569e+06
F1	F	2018-04-11 18:00:00	34.4721	76.5041	3220.87	3	638134	3.81553e+06
F1	F	2018-04-11 18:15:00	34.4739	76.5027	3226.75	1	638002	3.81572e+06
F1	F	2018-04-11 18:30:00	34.473	76.5003	2965.3	4.5	637784	3.81563e+06
F1	F	2018-04-11 18:45:00	34.4745	76.5021	3219.56	8.5	637949	3.81579e+06
F1	F	2018-04-11 19:00:00	34.4745	76.5022	3235.06	11.5	637955	3.81579e+06
F1	F	2018-04-11 19:15:00	34.4745	76.5021	3234.52	12.5	637949	3.81579e+06
F1	F	2018-04-11 19:30:00	34.4745	76.5023	3250.95	14	637959	3.81579e+06
F1	F	2018-04-11 19:45:00	34.4744	76.5021	3228.29	16	637949	3.81579e+06
F1	F	2018-04-11 20:00:00	34.4784	76.5003	3190.07	5.5	637778	3.81622e+06
F1	F	2018-04-11 20:15:00	34.4771	76.4986	3205.54	0.5	637616	3.81608e+06
F1	F	2018-04-11 20:30:00	34.4762	76.4989	3247.17	0	637649	3.81598e+06
F1	F	2018-04-11 20:45:00	34.476	76.4987	3213.7	0	637629	3.81596e+06
F1	F	2018-04-11 21:00:00	34.4759	76.4986	3217.22	0	637623	3.81594e+06
F1	F	2018-04-11 21:15:00	34.4743	76.4962	3326.09	0	637406	3.81576e+06
F1	F	2018-04-11 21:31:00	34.476	76.4989	3296.53	0	637652	3.81596e+06
F1	F	2018-04-11 21:46:00	34.4782	76.4974	3215.4	-1	637506	3.8162e+06
F1	F	2018-04-11 22:00:00	34.4777	76.4973	3194.02	-2.5	637498	3.81614e+06
F1	F	2018-04-11 22:16:00	34.4776	76.4978	3204.89	-1.5	637546	3.81613e+06
F1	F	2018-04-11 22:30:00	34.476	76.4968	2891.21	-2	637460	3.81595e+06
F1	F	2018-04-11 22:45:00	34.476	76.5005	3204.07	-0.5	637793	3.81596e+06
F1	F	2018-04-11 23:00:00	34.4772	76.499	3202.59	-2.5	637661	3.81608e+06
F1	F	2018-04-11 23:15:00	34.4752	76.4988	3239.54	-2	637645	3.81587e+06
F1	F	2018-04-11 23:30:00	34.4728	76.4983	3260.97	-2.5	637597	3.8156e+06
F1	F	2018-04-11 23:45:00	34.4734	76.5025	3241.53	-2.5	637981	3.81567e+06
F1	F	2018-05-11	34.4743	76.5033	3269.77	-3.5	638053	3.81577e+06
F1	F	2018-05-11 00:15:00	34.4746	76.5032	3230.6	-3	638050	3.8158e+06
F1	F	2018-05-11 00:30:00	34.4746	76.5031	3207.74	4	638041	3.81581e+06
F1	F	2018-05-11 00:45:00	34.4752	76.5029	3176.1	7	638015	3.81587e+06
F1	F	2018-05-11 01:00:00	34.4753	76.503	3201.92	17	638024	3.81588e+06
F1	F	2018-05-11 01:15:00	34.4751	76.5029	3190.87	20.5	638016	3.81586e+06
F1	F	2018-05-11 01:30:00	34.4752	76.5029	3255.91	21	638013	3.81587e+06
F1	F	2018-05-11 01:45:00	34.4749	76.5031	3046.97	19.5	638035	3.81584e+06
F1	F	2018-05-11 02:00:00	34.4752	76.5028	3210.89	18	638012	3.81587e+06
F1	F	2018-05-11 02:15:00	34.4752	76.5029	3227.4	16	638014	3.81587e+06
F1	F	2018-05-11 02:30:00	34.4751	76.503	3266.07	16	638025	3.81586e+06
F1	F	2018-05-11 02:45:00	34.475	76.5029	3259.53	16.5	638019	3.81585e+06
F1	F	2018-05-11 03:00:00	34.4752	76.5028	3217.55	16	638011	3.81588e+06
F1	F	2018-05-11 03:15:00	34.4751	76.5029	3216.88	17	638015	3.81587e+06
F1	F	2018-05-11 03:30:00	34.4752	76.5029	3213.05	16	638015	3.81587e+06
F1	F	2018-05-11 03:45:00	34.4751	76.5029	3232.6	17.5	638014	3.81586e+06
F1	F	2018-05-11 04:00:00	34.4752	76.503	3234.44	18	638024	3.81587e+06
F1	F	2018-05-11 04:15:00	34.4752	76.5029	3242.91	18	638020	3.81588e+06
F1	F	2018-05-11 04:31:00	34.4738	76.5034	2949.91	19.5	638068	3.81572e+06
F1	F	2018-05-11 04:45:00	34.4752	76.5028	3227.69	20.5	638013	3.81587e+06
F1	F	2018-05-11 05:00:00	34.4751	76.5029	3206.25	20.5	638018	3.81586e+06
F1	F	2018-05-11 05:15:00	34.4752	76.503	3203.77	20.5	638025	3.81587e+06
F1	F	2018-05-11 05:31:00	34.4751	76.5029	3213.57	22	638017	3.81587e+06
F1	F	2018-05-11 05:45:00	34.4745	76.5027	3219.9	20	637997	3.81579e+06
F1	F	2018-05-11 06:00:00	34.4745	76.5031	3221.01	23.5	638042	3.81579e+06
F1	F	2018-05-11 06:15:00	34.4744	76.5031	3230.75	29.5	638038	3.81578e+06
F1	F	2018-05-11 06:30:00	34.4745	76.5033	3230.5	36.5	638054	3.8158e+06
F1	F	2018-05-11 06:45:00	34.4744	76.5031	3192.46	42.5	638042	3.81578e+06
F1	F	2018-05-11 07:00:00	34.4745	76.5031	3219.97	39.5	638041	3.8158e+06
F1	F	2018-05-11 07:15:00	34.4745	76.5032	3192.85	34	638050	3.81579e+06
F1	F	2018-05-11 07:30:00	34.4745	76.5031	3214.26	32	638040	3.8158e+06
F1	F	2018-05-11 07:45:00	34.4745	76.5031	3220.09	31.5	638035	3.81579e+06
F1	F	2018-05-11 08:00:00	34.4745	76.5032	3222.85	29.5	638042	3.81579e+06
F1	F	2018-05-11 08:15:00	34.4745	76.5031	3216.2	27.5	638040	3.81579e+06
F1	F	2018-05-11 08:30:00	34.4745	76.5031	3217.12	27	638034	3.8158e+06
F1	F	2018-05-11 08:45:00	34.4744	76.5031	3251.03	25.5	638042	3.81579e+06
F1	F	2018-05-11 09:00:00	34.4745	76.5031	3219.28	25	638038	3.81579e+06
F1	F	2018-05-11 11:30:00	34.4723	76.5042	3218.72	8	638140	3.81555e+06
F1	F	2018-05-11 11:45:00	34.4724	76.5038	3251.48	11.5	638109	3.81557e+06
F1	F	2018-05-11 12:00:00	34.4724	76.5039	3231.73	22	638117	3.81557e+06
F1	F	2018-05-11 12:15:00	34.4724	76.5038	3216.8	26	638108	3.81557e+06
F1	F	2018-05-11 12:30:00	34.4726	76.5036	3207.2	25.5	638087	3.81558e+06
F1	F	2018-05-11 12:44:00	34.4749	76.502	3226.06	13.5	637934	3.81584e+06
F1	F	2018-05-11 13:00:00	34.4771	76.5002	3216.67	5	637771	3.81608e+06
F1	F	2018-05-11 13:15:00	34.4778	76.4988	3211.04	2.5	637640	3.81616e+06
F1	F	2018-05-11 13:30:00	34.4787	76.4994	3224	2	637686	3.81626e+06
F1	F	2018-05-11 13:45:00	34.4763	76.4996	3242.62	1	637716	3.81599e+06
F1	F	2018-05-11 14:00:00	34.4751	76.5028	3285.14	0.5	638010	3.81586e+06
F1	F	2018-05-11 16:45:00	34.4737	76.5048	3212.63	-2.5	638199	3.81571e+06
F1	F	2018-05-11 17:00:00	34.4741	76.5042	3205.15	-2	638135	3.81576e+06
F1	F	2018-05-11 17:15:00	34.4727	76.504	3213.81	-2	638123	3.81559e+06
F1	F	2018-05-11 17:31:00	34.4729	76.5035	3213.4	-1	638076	3.81562e+06
F1	F	2018-05-11 17:45:00	34.4718	76.5036	3271.56	0.5	638087	3.81549e+06
F1	F	2018-05-11 19:46:00	34.4606	76.5645	0.03	22.5	643705	3.81433e+06
F1	F	2018-05-11 20:00:00	34.4729	76.5034	3229.95	14.5	638067	3.81562e+06
F1	F	2018-05-11 20:15:00	34.4754	76.5012	3193.88	4.5	637864	3.81589e+06
F1	F	2018-05-11 20:30:00	34.4778	76.4989	3223.96	0	637643	3.81615e+06
F1	F	2018-05-11 20:45:00	34.4787	76.4993	3203.58	-2.5	637682	3.81626e+06
F1	F	2018-05-11 21:00:00	34.4779	76.5002	3186.07	-3.5	637767	3.81617e+06
F1	F	2018-05-11 21:16:00	34.4822	76.4959	201.81	-3.5	637364	3.81664e+06
F1	F	2018-05-11 21:31:00	34.4503	76.5121	-0.39	-3.5	638903	3.81312e+06
F1	F	2018-05-11 21:46:00	34.4758	76.4986	3237.74	-3	637626	3.81594e+06
F1	F	2018-05-11 22:01:00	34.473	76.4888	-0.46	-2.5	636731	3.81561e+06
F1	F	2018-05-11 22:15:00	34.4753	76.5007	3230.51	-2	637813	3.81588e+06
F1	F	2018-05-11 22:30:00	34.4752	76.5025	3201.72	-3	637980	3.81587e+06
F1	F	2018-05-11 22:45:00	34.4754	76.5032	3206.51	-3	638045	3.81589e+06
F1	F	2018-05-11 23:00:00	34.4752	76.5028	3206.65	0.5	638011	3.81587e+06
F1	F	2018-05-11 23:15:00	34.4753	76.5028	3191.12	8.5	638010	3.81588e+06
F1	F	2018-05-11 23:30:00	34.4755	76.5027	3179.94	13	637995	3.81591e+06
F1	F	2018-05-11 23:45:00	34.4751	76.5029	3204.52	16	638014	3.81587e+06
F1	F	2018-06-11	34.4751	76.5028	3206.83	12	638013	3.81587e+06
F1	F	2018-06-11 00:15:00	34.4752	76.5028	3204.83	12.5	638007	3.81587e+06
F1	F	2018-06-11 00:30:00	34.4752	76.5028	3199.48	12.5	638010	3.81587e+06
F1	F	2018-06-11 00:45:00	34.4752	76.5033	3296.58	13.5	638055	3.81587e+06
F1	F	2018-06-11 01:00:00	34.4752	76.5029	3245.71	14	638016	3.81587e+06
F1	F	2018-06-11 01:15:00	34.4752	76.5029	3212.48	14.5	638018	3.81587e+06
F1	F	2018-06-11 01:30:00	34.4751	76.5028	3206.74	14.5	638013	3.81586e+06
F1	F	2018-06-11 01:45:00	34.4751	76.5029	3208.65	14.5	638019	3.81587e+06
F1	F	2018-06-11 02:00:00	34.4752	76.5028	3215.19	14	638012	3.81587e+06
F1	F	2018-06-11 02:15:00	34.4751	76.5028	3215.29	14	638011	3.81587e+06
F1	F	2018-06-11 02:30:00	34.4751	76.5029	3214.41	13.5	638019	3.81586e+06
F1	F	2018-06-11 02:45:00	34.4754	76.5028	3157.48	15	638007	3.81589e+06
F1	F	2018-06-11 03:00:00	34.4752	76.5029	3204.94	18.5	638013	3.81587e+06
F1	F	2018-06-11 03:15:00	34.4752	76.5028	3204.11	23.5	638009	3.81587e+06
F1	F	2018-06-11 03:30:00	34.4751	76.5029	3238.09	24.5	638022	3.81586e+06
F1	F	2018-06-11 03:45:00	34.475	76.5033	3241.06	23.5	638051	3.81585e+06
F1	F	2018-06-11 04:00:00	34.4752	76.5032	3210.48	23	638048	3.81587e+06
F1	F	2018-06-11 04:15:00	34.4752	76.5032	3211.71	26.5	638045	3.81588e+06
F1	F	2018-06-11 04:30:00	34.4752	76.5032	3210.07	26.5	638043	3.81587e+06
F1	F	2018-06-11 04:45:00	34.4753	76.5031	3229.05	26	638039	3.81589e+06
F1	F	2018-06-11 05:00:00	34.4753	76.5032	3202.64	25	638048	3.81588e+06
F1	F	2018-06-11 05:15:00	34.4753	76.5032	3232.37	23.5	638049	3.81588e+06
F1	F	2018-06-11 05:30:00	34.4758	76.5027	3228.56	19	637999	3.81594e+06
F1	F	2018-06-11 05:45:00	34.4758	76.5029	3217.75	25	638014	3.81594e+06
F1	F	2018-06-11 06:00:00	34.4759	76.5023	3261.52	29.5	637957	3.81595e+06
F1	F	2018-06-11 06:15:00	34.4762	76.5023	3208.07	29.5	637961	3.81598e+06
F1	F	2018-06-11 06:30:00	34.476	76.5019	3181.96	24	637927	3.81596e+06
F1	F	2018-06-11 07:01:00	34.4689	76.4833	-0.44	14	636225	3.81514e+06
F1	F	2018-06-11 07:16:00	34.4757	76.5006	3211.16	10.5	637807	3.81593e+06
F1	F	2018-06-11 07:31:00	34.476	76.5024	3203.14	12.5	637969	3.81596e+06
F1	F	2018-06-11 07:45:00	34.475	76.5022	3225.59	14.5	637957	3.81585e+06
F1	F	2018-06-11 08:00:00	34.475	76.5021	3197.45	18	637949	3.81585e+06
F1	F	2018-06-11 08:15:00	34.475	76.5022	3221.56	21	637951	3.81585e+06
F1	F	2018-06-11 08:30:00	34.475	76.5023	3210.2	19.5	637960	3.81585e+06
F1	F	2018-06-11 08:44:00	34.4721	76.504	3218.59	13	638127	3.81553e+06
F1	F	2018-06-11 08:59:00	34.4718	76.5018	3311.01	17.5	637921	3.81549e+06
F1	F	2018-06-11 09:14:00	34.4745	76.5006	3295.44	18.5	637810	3.81579e+06
F1	F	2018-06-11 09:45:00	34.4737	76.4962	3320.96	11.5	637409	3.81569e+06
F1	F	2018-06-11 10:00:00	34.4779	76.4956	3254.83	11	637342	3.81616e+06
F1	F	2018-06-11 10:46:00	34.48	76.4949	3212.17	6	637272	3.8164e+06
F1	F	2018-06-11 11:00:00	34.4802	76.4939	3216.41	10.5	637183	3.81642e+06
F1	F	2018-06-11 11:15:00	34.4803	76.4941	3227.06	22.5	637200	3.81642e+06
F1	F	2018-06-11 11:30:00	34.4803	76.4942	3220.28	24	637209	3.81642e+06
F1	F	2018-06-11 11:45:00	34.4802	76.4941	3228.71	23.5	637201	3.81642e+06
F1	F	2018-06-11 12:00:00	34.4802	76.494	3204.75	23.5	637197	3.81642e+06
F1	F	2018-06-11 12:15:00	34.4803	76.4941	3214.62	24.5	637197	3.81642e+06
F1	F	2018-06-11 12:30:00	34.4803	76.494	3214.07	27	637191	3.81642e+06
F1	F	2018-06-11 12:45:00	34.4802	76.4942	3212.53	28.5	637212	3.81642e+06
F1	F	2018-06-11 13:00:00	34.4803	76.496	3198.78	13.5	637378	3.81642e+06
F1	F	2018-06-11 13:15:00	34.479	76.4975	3236.34	4	637515	3.81629e+06
F1	F	2018-06-11 13:31:00	34.486	76.4903	0.41	1.5	636841	3.81705e+06
F1	F	2018-06-11 13:46:00	34.4756	76.5025	2802.86	0.5	637982	3.81592e+06
F1	F	2018-06-11 14:01:00	34.4732	76.5036	3207.65	-0.5	638084	3.81565e+06
F1	F	2018-06-11 14:15:00	34.4734	76.5032	3226.61	-1	638046	3.81567e+06
F1	F	2018-06-11 14:30:00	34.4751	76.5004	3232.38	0	637792	3.81586e+06
F1	F	2018-06-11 14:45:00	34.4755	76.4982	3228.38	0.5	637585	3.8159e+06
F1	F	2018-06-11 15:00:00	34.4756	76.4981	3233.83	4	637576	3.81591e+06
F1	F	2018-06-11 15:15:00	34.4756	76.4981	3240.29	8	637579	3.81591e+06
F1	F	2018-06-11 15:31:00	34.4757	76.4981	3245.69	18	637572	3.81592e+06
F1	F	2018-06-11 15:46:00	34.4743	76.4964	3322.88	8	637418	3.81577e+06
F1	F	2018-06-11 16:00:00	34.4742	76.4961	3347.17	4.5	637397	3.81576e+06
F1	F	2018-06-11 16:15:00	34.4733	76.4953	3420.02	5	637326	3.81565e+06
F1	F	2018-06-11 16:31:00	34.4747	76.4939	3141.92	18.5	637195	3.8158e+06
F1	F	2018-06-11 16:45:00	34.4734	76.4952	3343.15	23.5	637311	3.81566e+06
F1	F	2018-06-11 17:00:00	34.4735	76.4951	3334.95	26	637307	3.81567e+06
F1	F	2018-06-11 17:15:00	34.4735	76.4951	3330.14	26	637305	3.81567e+06
F1	F	2018-06-11 17:30:00	34.4732	76.4953	3375.24	25	637325	3.81564e+06
F1	F	2018-06-11 17:46:00	34.4734	76.4952	3347.87	25.5	637310	3.81566e+06
F1	F	2018-06-11 18:00:00	34.4734	76.4952	3305.23	25.5	637316	3.81566e+06
F1	F	2018-06-11 18:15:00	34.4734	76.4952	3359.32	25	637314	3.81566e+06
F1	F	2018-06-11 18:46:00	34.4734	76.4952	3344.56	25.5	637313	3.81566e+06
F1	F	2018-06-11 19:01:00	34.4511	76.4982	-0.22	25.5	637624	3.8132e+06
F1	F	2018-06-11 19:15:00	34.4735	76.4951	3350.76	25.5	637306	3.81567e+06
F1	F	2018-06-11 19:30:00	34.4734	76.4952	3343.51	23	637315	3.81566e+06
F1	F	2018-06-11 19:45:00	34.4734	76.4952	3348.77	26	637310	3.81566e+06
F1	F	2018-06-11 20:00:00	34.4734	76.4952	3343.19	31	637312	3.81566e+06
F1	F	2018-06-11 20:16:00	34.4735	76.4952	3345.01	33	637316	3.81567e+06
F1	F	2018-06-11 20:30:00	34.5358	76.4712	-0.15	32	635012	3.82255e+06
F1	F	2018-06-11 21:01:00	34.4873	76.4774	-0.09	29	635652	3.81718e+06
F1	F	2018-06-11 21:16:00	34.4943	76.4668	-0.53	26.5	634674	3.81795e+06
F1	F	2018-06-11 21:30:00	34.5004	76.4638	-0.45	24.5	634388	3.81861e+06
F1	F	2018-06-11 21:46:00	34.5781	76.4294	0.34	20	631103	3.82719e+06
F1	F	2018-06-11 22:00:00	34.526	76.47	-0.33	18	634913	3.82146e+06
F1	F	2018-06-11 22:46:00	34.4946	76.4828	0.32	18	636138	3.818e+06
F1	F	2018-06-11 23:01:00	34.4734	76.4952	3341.92	23.5	637312	3.81566e+06
F1	F	2018-06-11 23:16:00	34.4726	76.4962	3308.79	21.5	637407	3.81558e+06
F1	F	2018-06-11 23:29:00	34.4718	76.5002	3338.68	6.5	637777	3.81549e+06
F1	F	2018-06-11 23:44:00	34.4726	76.5041	3198.28	0	638136	3.81558e+06
F1	F	2018-07-11	34.4742	76.5032	3196.37	-2	638047	3.81576e+06
F1	F	2018-07-11 00:15:00	34.4754	76.5031	3186.36	0	638033	3.8159e+06
F1	F	2018-07-11 00:30:00	34.4752	76.5029	3164.14	5	638020	3.81587e+06
F1	F	2018-07-11 00:45:00	34.4755	76.5031	3200.95	9	638032	3.8159e+06
F1	F	2018-07-11 01:00:00	34.4755	76.5029	3188.43	12	638021	3.8159e+06
F1	F	2018-07-11 01:15:00	34.4756	76.503	3210.06	14	638030	3.81591e+06
F1	F	2018-07-11 01:31:00	34.4756	76.5031	3216.58	16	638038	3.81591e+06
F1	F	2018-07-11 01:45:00	34.4755	76.5032	3190.29	16	638041	3.81591e+06
F1	F	2018-07-11 02:00:00	34.4754	76.5031	3232.9	19	638032	3.81589e+06
F1	F	2018-07-11 02:15:00	34.4755	76.503	3187.36	26	638029	3.81591e+06
F1	F	2018-07-11 02:31:00	34.4771	76.5022	2891.29	30	637955	3.81608e+06
F1	F	2018-07-11 02:45:00	34.4755	76.5031	3197.31	32.5	638032	3.8159e+06
F1	F	2018-07-11 03:00:00	34.4756	76.5031	3209.62	33.5	638034	3.81591e+06
F1	F	2018-07-11 03:15:00	34.4761	76.5044	-0.62	35	638158	3.81598e+06
F1	F	2018-07-11 03:30:00	34.4755	76.5031	3201.59	35.5	638034	3.81591e+06
F1	F	2018-07-11 03:45:00	34.4755	76.5032	3218.8	35.5	638040	3.8159e+06
F1	F	2018-07-11 04:00:00	34.4755	76.5031	3232.55	31.5	638035	3.81591e+06
F1	F	2018-07-11 04:15:00	34.4755	76.5031	3203.07	29	638031	3.8159e+06
F1	F	2018-07-11 04:30:00	34.4753	76.5031	3190.93	27	638037	3.81589e+06
F1	F	2018-07-11 04:45:00	34.4758	76.5029	3261.9	26	638019	3.81594e+06
F1	F	2018-07-11 05:01:00	34.4755	76.5031	3216.13	25	638035	3.81591e+06
F1	F	2018-07-11 05:15:00	34.4755	76.5032	3220.11	23	638042	3.81591e+06
F1	F	2018-07-11 05:30:00	34.4755	76.5032	3190.33	22	638043	3.8159e+06
F1	F	2018-07-11 05:45:00	34.4756	76.503	3160.43	21.5	638024	3.81592e+06
F1	F	2018-07-11 06:00:00	34.4755	76.5031	3212.51	22.5	638032	3.8159e+06
F1	F	2018-07-11 06:15:00	34.4754	76.5026	3203.78	24.5	637993	3.81589e+06
F1	F	2018-07-11 06:30:00	34.4754	76.5031	3208.78	28.5	638032	3.81589e+06
F1	F	2018-07-11 06:45:00	34.4755	76.503	3216.62	28	638030	3.8159e+06
F1	F	2018-07-11 06:59:00	34.4755	76.5032	3206.05	29	638042	3.8159e+06
F1	F	2018-07-11 07:15:00	34.4754	76.5031	3193.25	28	638032	3.8159e+06
F1	F	2018-07-11 07:30:00	34.4757	76.5022	3204.97	22.5	637950	3.81592e+06
F1	F	2018-07-11 07:45:00	34.4764	76.502	3181.23	15	637929	3.816e+06
F1	F	2018-07-11 08:00:00	34.4749	76.5019	3235.33	14	637928	3.81584e+06
F1	F	2018-07-11 08:15:00	34.4723	76.504	3231.33	12.5	638125	3.81555e+06
F1	F	2018-07-11 08:29:00	34.4754	76.5016	3246.93	11	637900	3.81589e+06
F1	F	2018-07-11 08:45:00	34.4761	76.5015	3211.9	8.5	637883	3.81597e+06
F1	F	2018-07-11 09:00:00	34.4774	76.5018	3198.01	20.5	637910	3.81612e+06
F1	F	2018-07-11 09:14:00	34.4773	76.5016	3227.33	32	637896	3.8161e+06
F1	F	2018-07-11 09:30:00	34.4773	76.5017	3210.9	30.5	637900	3.8161e+06
F1	F	2018-07-11 09:45:00	34.4773	76.5016	3210.82	27.5	637894	3.8161e+06
F1	F	2018-07-11 10:00:00	34.4774	76.5017	3219.06	28.5	637900	3.81611e+06
F1	F	2018-07-11 10:15:00	34.4773	76.5017	3224.56	35	637905	3.81611e+06
F1	F	2018-07-11 10:30:00	34.4774	76.5013	3203.03	36	637869	3.81612e+06
F1	F	2018-07-11 10:45:00	34.4773	76.5014	3206.41	28	637875	3.81611e+06
F1	F	2018-07-11 11:00:00	34.4774	76.5014	3209.29	30	637873	3.81611e+06
F1	F	2018-07-11 11:15:00	34.4774	76.5013	3196.94	31.5	637870	3.81611e+06
F1	F	2018-07-11 11:29:00	34.4772	76.5014	3227.35	31.5	637878	3.8161e+06
F1	F	2018-07-11 11:45:00	34.4772	76.5015	3230.16	29	637887	3.81609e+06
F1	F	2018-07-11 12:00:00	34.4774	76.5014	3207.97	24.5	637874	3.81611e+06
F1	F	2018-07-11 12:14:00	34.4775	76.5014	3191.58	22	637876	3.81612e+06
F1	F	2018-07-11 12:30:00	34.4773	76.5004	3191.79	15	637782	3.81611e+06
F1	F	2018-07-11 12:46:00	34.478	76.4986	3217.29	7	637621	3.81618e+06
F1	F	2018-07-11 13:01:00	34.4812	76.4956	-0.23	4.5	637337	3.81652e+06
F1	F	2018-07-11 13:30:00	34.4771	76.5007	3201.66	2	637808	3.81608e+06
F1	F	2018-07-11 13:45:00	34.4748	76.5031	3207.53	0	638032	3.81583e+06
F1	F	2018-07-11 14:00:00	34.4721	76.5047	3210.07	1	638184	3.81553e+06
F1	F	2018-07-11 14:15:00	34.4725	76.5039	3228.73	1	638109	3.81557e+06
F1	F	2018-07-11 14:29:00	34.473	76.5046	3213.32	1	638174	3.81563e+06
F1	F	2018-07-11 14:44:00	34.4737	76.505	3207.3	0	638212	3.81571e+06
F1	F	2018-07-11 15:00:00	34.4729	76.5037	3214.36	-1.5	638097	3.81562e+06
F1	F	2018-07-11 15:15:00	34.473	76.5035	3228.59	5.5	638077	3.81563e+06
F1	F	2018-07-11 15:30:00	34.4731	76.5035	3238.92	16.5	638077	3.81564e+06
F1	F	2018-07-11 15:46:00	34.4721	76.5038	3304.74	10	638106	3.81553e+06
F1	F	2018-07-11 15:59:00	34.4713	76.5025	3298.41	5	637991	3.81544e+06
F1	F	2018-07-11 16:15:00	34.4708	76.5013	3350.68	2.5	637876	3.81539e+06
F1	F	2018-07-11 16:31:00	34.4705	76.5	3309.18	2	637759	3.81534e+06
F1	F	2018-07-11 16:45:00	34.4728	76.5005	3311.54	0.5	637804	3.81561e+06
F1	F	2018-07-11 17:00:00	34.4756	76.4988	3231.83	0	637645	3.81591e+06
F1	F	2018-07-11 17:15:00	34.4764	76.4995	3200.57	0	637703	3.816e+06
F1	F	2018-07-11 17:30:00	34.4778	76.4992	3204.97	-1.5	637673	3.81615e+06
F1	F	2018-07-11 17:45:00	34.4758	76.499	3238.27	-1	637660	3.81593e+06
F1	F	2018-07-11 18:00:00	34.4755	76.4988	3228.39	-0.5	637644	3.8159e+06
F1	F	2018-07-11 18:15:00	34.4759	76.4991	3225.8	0	637663	3.81595e+06
F1	F	2018-07-11 18:30:00	34.4757	76.5004	3233.79	0	637787	3.81592e+06
F1	F	2018-07-11 18:45:00	34.4775	76.5006	3201.9	-2	637805	3.81612e+06
F1	F	2018-07-11 19:00:00	34.4765	76.499	3215.08	-3	637658	3.81601e+06
F1	F	2018-07-11 19:15:00	34.4758	76.4989	3240.91	-1.5	637649	3.81593e+06
F1	F	2018-07-11 19:30:00	34.4774	76.4972	3222.66	-1	637490	3.81611e+06
F1	F	2018-07-11 19:45:00	34.4786	76.4957	3214.51	-1	637352	3.81624e+06
F1	F	2018-07-11 20:00:00	34.481	76.4944	3195.09	-1	637224	3.81651e+06
F1	F	2018-07-11 20:15:00	34.4781	76.4974	3204.72	-2.5	637512	3.81619e+06
F1	F	2018-07-11 20:30:00	34.4779	76.4984	3215.4	-2.5	637596	3.81616e+06
F1	F	2018-07-11 20:45:00	34.4781	76.4991	3212.66	-2.5	637660	3.81618e+06
F1	F	2018-07-11 21:00:00	34.4778	76.5004	3203.37	-3	637786	3.81616e+06
F1	F	2018-07-11 22:15:00	34.4691	76.4995	3383.1	-1.5	637712	3.81519e+06
F1	F	2018-07-11 22:30:00	34.4693	76.4952	3344.31	-1.5	637318	3.81521e+06
F1	F	2018-07-11 22:45:00	34.4703	76.4977	3326.81	-1.5	637552	3.81532e+06
F1	F	2018-07-11 23:00:00	34.4746	76.4982	3246.76	-1	637589	3.8158e+06
F1	F	2018-07-11 23:14:00	34.4779	76.4991	3177.59	-1.5	637662	3.81617e+06
F1	F	2018-07-11 23:30:00	34.4778	76.4999	3213.59	-1.5	637741	3.81615e+06
F1	F	2018-07-11 23:45:00	34.4773	76.5	3204.22	-0.5	637752	3.8161e+06
F1	F	2018-08-11	34.477	76.5009	3200.79	-1	637828	3.81607e+06
F1	F	2018-08-11 00:30:00	34.4754	76.5028	3228.55	7	638008	3.81589e+06
F1	F	2018-08-11 00:45:00	34.4754	76.5029	3209.86	13	638021	3.81589e+06
F1	F	2018-08-11 01:00:00	34.4757	76.5034	3225.03	18	638063	3.81593e+06
F1	F	2018-08-11 01:15:00	34.4755	76.5031	3204.04	22	638036	3.8159e+06
F1	F	2018-08-11 01:30:00	34.4755	76.5031	3204.99	23	638034	3.8159e+06
F1	F	2018-08-11 01:46:00	34.4755	76.5031	3214.29	24	638034	3.81591e+06
F1	F	2018-08-11 02:00:00	34.4755	76.5031	3204.67	22.5	638032	3.81591e+06
F1	F	2018-08-11 02:15:00	34.4755	76.503	3205.21	21	638027	3.81591e+06
F1	F	2018-08-11 02:30:00	34.4754	76.5031	3234.71	21	638039	3.81589e+06
F1	F	2018-08-11 02:45:00	34.4755	76.5031	3212.45	23.5	638034	3.8159e+06
F1	F	2018-08-11 03:00:00	34.4755	76.5031	3214.14	23.5	638037	3.81591e+06
F1	F	2018-08-11 03:15:00	34.4755	76.5031	3207.66	23	638039	3.81591e+06
F1	F	2018-08-11 03:30:00	34.4755	76.5031	3207.07	22.5	638035	3.81591e+06
F1	F	2018-08-11 03:45:00	34.4755	76.503	3193.87	22.5	638031	3.8159e+06
F1	F	2018-08-11 04:00:00	34.4755	76.5031	3212.4	23.5	638035	3.81591e+06
F1	F	2018-08-11 04:15:00	34.4758	76.5034	3290.21	23	638060	3.81594e+06
F1	F	2018-08-11 04:30:00	34.4754	76.503	3230.35	23	638031	3.81589e+06
F1	F	2018-08-11 04:45:00	34.4755	76.5032	3202.98	27	638042	3.81591e+06
F1	F	2018-08-11 05:00:00	34.4755	76.5032	3202.84	27.5	638041	3.81591e+06
F1	F	2018-08-11 05:15:00	34.4755	76.5031	3213.12	28.5	638033	3.8159e+06
F1	F	2018-08-11 05:30:00	34.4754	76.503	3218.81	29	638025	3.8159e+06
F1	F	2018-08-11 05:46:00	34.4552	76.5403	0	30.5	641487	3.8137e+06
F1	F	2018-08-11 06:01:00	34.4614	76.4653	0.54	29	634584	3.8143e+06
F1	F	2018-08-11 06:16:00	34.4755	76.503	3226.08	29	638025	3.81591e+06
F1	F	2018-08-11 06:30:00	34.4755	76.5031	3198.09	27.5	638038	3.81591e+06
F1	F	2018-08-11 06:45:00	34.4755	76.5031	3203.63	28	638034	3.8159e+06
F1	F	2018-08-11 07:00:00	34.4755	76.503	3212.46	26.5	638031	3.8159e+06
F1	F	2018-08-11 07:15:00	34.4756	76.503	3267.69	27.5	638026	3.81591e+06
F1	F	2018-08-11 07:30:00	34.4755	76.5031	3199.03	27.5	638039	3.8159e+06
F1	F	2018-08-11 07:45:00	34.4755	76.5031	3201.64	28	638036	3.81591e+06
F1	F	2018-08-11 08:00:00	34.4756	76.5031	3214.43	28	638035	3.81591e+06
F1	F	2018-08-11 08:15:00	34.4755	76.5031	3197.38	28	638040	3.8159e+06
F1	F	2018-08-11 08:30:00	34.4762	76.5025	3199.19	23	637976	3.81599e+06
F1	F	2018-08-11 08:45:00	34.4752	76.502	3168.42	17	637935	3.81587e+06
F1	F	2018-08-11 09:00:00	34.4746	76.5032	3209.14	17.5	638046	3.81581e+06
F1	F	2018-08-11 09:15:00	34.4745	76.5032	3205.14	22.5	638045	3.81579e+06
F1	F	2018-08-11 09:30:00	34.4746	76.5032	3214.14	21	638046	3.8158e+06
F1	F	2018-08-11 09:45:00	34.4745	76.5032	3205.4	20.5	638049	3.8158e+06
F1	F	2018-08-11 10:00:00	34.4746	76.5032	3194.18	20	638046	3.8158e+06
F1	F	2018-08-11 10:15:00	34.4746	76.5032	3207.72	20.5	638047	3.8158e+06
F1	F	2018-08-11 10:30:00	34.4743	76.5032	3164.52	18.5	638043	3.81577e+06
F1	F	2018-08-11 10:46:00	34.4727	76.5036	3224.46	11.5	638088	3.81559e+06
F1	F	2018-08-11 11:00:00	34.4745	76.5022	3214.45	8	637952	3.81579e+06
F1	F	2018-08-11 11:15:00	34.475	76.5015	3214.58	6	637885	3.81585e+06
F1	F	2018-08-11 11:30:00	34.4755	76.501	3215.72	6.5	637840	3.8159e+06
F1	F	2018-08-11 11:45:00	34.4755	76.5008	3204.58	9	637827	3.8159e+06
F1	F	2018-08-11 12:00:00	34.4755	76.5011	3234.66	11.5	637847	3.8159e+06
F1	F	2018-08-11 12:15:00	34.4755	76.5009	3215.41	13.5	637835	3.8159e+06
F1	F	2018-08-11 12:30:00	34.4768	76.5015	3213.71	10.5	637883	3.81604e+06
F1	F	2018-08-11 12:45:00	34.4786	76.4973	3213.28	4.5	637501	3.81624e+06
F1	F	2018-08-11 13:00:00	34.478	76.4992	3210.25	1.5	637672	3.81618e+06
F1	F	2018-08-11 13:15:00	34.4774	76.4983	3228.15	1.5	637588	3.81611e+06
F1	F	2018-08-11 13:30:00	34.4756	76.4999	3253.56	2.5	637741	3.81591e+06
F1	F	2018-08-11 13:45:00	34.4727	76.5034	3245.67	3	638069	3.8156e+06
F1	F	2018-08-11 14:00:00	34.4724	76.504	3237.28	3	638121	3.81557e+06
F1	F	2018-08-11 14:15:00	34.4725	76.504	3220.65	12	638125	3.81557e+06
F1	F	2018-08-11 14:30:00	34.4732	76.5024	3236.49	7	637980	3.81565e+06
F1	F	2018-08-11 14:45:00	34.4764	76.5009	3200.1	4.5	637828	3.816e+06
F1	F	2018-08-11 15:00:00	34.4783	76.4997	3187.37	3	637717	3.81621e+06
F1	F	2018-08-11 15:15:00	34.476	76.503	3207.73	2.5	638028	3.81596e+06
F1	F	2018-08-11 15:30:00	34.4738	76.5033	3196.41	2	638054	3.81571e+06
F1	F	2018-08-11 15:45:00	34.4729	76.5041	3192.47	1.5	638135	3.81562e+06
F1	F	2018-08-11 16:00:00	34.4723	76.5041	3221.91	9	638131	3.81556e+06
F1	F	2018-08-11 16:15:00	34.4738	76.5028	3229.82	5	638015	3.81572e+06
F1	F	2018-08-11 16:30:00	34.4762	76.5022	3219.57	2	637950	3.81599e+06
F1	F	2018-08-11 16:45:00	34.4763	76.5021	3215.49	1.5	637943	3.816e+06
F1	F	2018-08-11 17:00:00	34.4764	76.502	3263.2	1.5	637931	3.81601e+06
F1	F	2018-08-11 17:15:00	34.4747	76.503	3212.37	1	638028	3.81581e+06
F1	F	2018-08-11 17:30:00	34.4728	76.505	3213.95	1	638211	3.81561e+06
F1	F	2018-08-11 17:45:00	34.4725	76.5043	3209.47	0	638148	3.81558e+06
F1	F	2018-08-11 18:00:00	34.4724	76.5041	3214.52	3	638137	3.81556e+06
F1	F	2018-08-11 18:15:00	34.4727	76.5041	3256.9	8	638134	3.8156e+06
F1	F	2018-08-11 18:30:00	34.4724	76.5041	3225.82	11.5	638133	3.81557e+06
F1	F	2018-08-11 18:45:00	34.4718	76.5034	3258.31	9.5	638071	3.81549e+06
F1	F	2018-08-11 19:00:00	34.4703	76.4995	3328.19	4.5	637713	3.81533e+06
F1	F	2018-08-11 19:15:00	34.4742	76.4982	3233.01	2	637585	3.81576e+06
F1	F	2018-08-11 19:30:00	34.4774	76.4975	3222.46	2.5	637520	3.81611e+06
F1	F	2018-08-11 19:45:00	34.4775	76.497	3226.51	2.5	637471	3.81612e+06
F1	F	2018-08-11 20:00:00	34.4781	76.4984	3202.08	2	637598	3.81619e+06
F1	F	2018-08-11 20:14:00	34.4784	76.4988	3193.09	2.5	637638	3.81623e+06
F1	F	2018-08-11 20:30:00	34.4781	76.4987	3199.66	2.5	637626	3.81619e+06
F1	F	2018-08-11 20:45:00	34.4789	76.4977	3201.64	4	637533	3.81627e+06
F1	F	2018-08-11 21:01:00	34.4787	76.4975	3196.57	4	637515	3.81625e+06
F1	F	2018-08-11 21:15:00	34.4787	76.4975	3215.2	12	637517	3.81625e+06
F1	F	2018-08-11 21:30:00	34.4786	76.4976	3215.36	16.5	637524	3.81625e+06
F1	F	2018-08-11 21:45:00	34.4786	76.4975	3198.73	19.5	637518	3.81624e+06
F1	F	2018-08-11 22:00:00	34.4786	76.4975	3191.94	20.5	637516	3.81625e+06
F1	F	2018-09-11 07:15:00	34.4755	76.503	3218.05	28.5	638025	3.8159e+06
F1	F	2018-09-11 07:30:00	34.4755	76.5031	3209.19	27.5	638035	3.8159e+06
F1	F	2018-09-11 07:45:00	34.4755	76.503	3224.17	26.5	638029	3.8159e+06
F1	F	2018-09-11 07:59:00	34.4756	76.5031	3210.63	24.5	638040	3.81592e+06
F1	F	2018-09-11 08:15:00	34.4755	76.5031	3218.36	23.5	638031	3.8159e+06
F1	F	2018-09-11 08:30:00	34.4755	76.5032	3211.15	23.5	638042	3.81591e+06
F1	F	2018-09-11 08:45:00	34.4755	76.503	3211.01	24.5	638028	3.8159e+06
F1	F	2018-09-11 09:01:00	34.4751	76.503	3204.85	26	638027	3.81586e+06
F1	F	2018-09-11 09:15:00	34.4755	76.5031	3207.78	27.5	638033	3.8159e+06
F1	F	2018-09-11 09:29:00	34.4756	76.5032	3203.34	27.5	638045	3.81592e+06
F1	F	2018-09-11 09:45:00	34.4755	76.5031	3204.86	27.5	638034	3.8159e+06
F1	F	2018-09-11 10:00:00	34.4755	76.5031	3199.07	26.5	638040	3.81591e+06
F1	F	2018-09-11 10:14:00	34.4755	76.5031	3242.76	27.5	638032	3.8159e+06
F1	F	2018-09-11 10:29:00	34.4754	76.503	3215.46	31.5	638026	3.81589e+06
F1	F	2018-09-11 10:45:00	34.4756	76.503	3212.1	34	638027	3.81592e+06
F1	F	2018-09-11 10:59:00	34.4757	76.5028	3202.28	25.5	638012	3.81593e+06
F1	F	2018-09-11 11:15:00	34.4746	76.5028	3208.25	16	638008	3.81581e+06
F1	F	2018-09-11 11:31:00	34.4723	76.5043	3218.15	11	638153	3.81556e+06
F1	F	2018-09-11 12:00:00	34.4714	76.501	3313.52	13	637847	3.81545e+06
F1	F	2018-09-11 12:15:00	34.4714	76.501	3318.04	21	637850	3.81545e+06
F1	F	2018-09-11 12:29:00	34.4714	76.501	3328.99	25	637852	3.81545e+06
F1	F	2018-09-11 12:44:00	34.4693	76.4969	3335.04	14	637473	3.81521e+06
F1	F	2018-09-11 13:00:00	34.4711	76.4983	3307.23	8.5	637604	3.81541e+06
F1	F	2018-10-11 00:15:00	34.4754	76.5029	3215.25	23	638017	3.8159e+06
F1	F	2018-10-11 00:30:00	34.4754	76.5029	3223.29	24	638013	3.8159e+06
F1	F	2018-10-11 00:45:00	34.4755	76.503	3217.05	22.5	638029	3.81591e+06
F1	F	2018-10-11 01:00:00	34.4755	76.5031	3209.58	23.5	638033	3.81591e+06
F1	F	2018-10-11 01:15:00	34.4756	76.5031	3204.51	23.5	638037	3.81592e+06
F1	F	2018-10-11 01:30:00	34.4755	76.503	3248.55	24	638023	3.81591e+06
F1	F	2018-10-11 01:45:00	34.4755	76.5031	3194.4	24	638039	3.81591e+06
F1	F	2018-10-11 02:00:00	34.4755	76.5031	3226.28	24.5	638034	3.81591e+06
F1	F	2018-10-11 02:15:00	34.4755	76.5031	3203.23	24.5	638039	3.81591e+06
F1	F	2018-10-11 02:30:00	34.4754	76.5032	3272.21	24	638045	3.8159e+06
F1	F	2018-10-11 02:45:00	34.4755	76.503	3205.43	23	638031	3.81591e+06
F1	F	2018-10-11 03:00:00	34.4757	76.5031	3209.86	21	638031	3.81593e+06
F1	F	2018-10-11 03:15:00	34.4755	76.5031	3211.55	24.5	638034	3.81591e+06
F1	F	2018-10-11 03:30:00	34.4756	76.5031	3211.22	26.5	638034	3.81592e+06
F1	F	2018-10-11 03:45:00	34.4755	76.5031	3201.59	25.5	638034	3.81591e+06
F1	F	2018-10-11 04:00:00	34.4755	76.5031	3206.87	26.5	638036	3.81591e+06
F1	F	2018-10-11 04:15:00	34.4755	76.5031	3200.64	29.5	638036	3.81591e+06
F1	F	2018-10-11 04:30:00	34.4755	76.5031	3209.24	31.5	638036	3.81591e+06
F1	F	2018-10-11 04:45:00	34.4755	76.503	3208.84	31	638028	3.81591e+06
F1	F	2018-10-11 05:00:00	34.4755	76.5029	3202.56	27.5	638017	3.8159e+06
F1	F	2018-10-11 05:15:00	34.4756	76.5031	3212.01	29.5	638037	3.81591e+06
F1	F	2018-10-11 05:30:00	34.4755	76.5031	3206.27	31	638032	3.81591e+06
F1	F	2018-10-11 05:45:00	34.4755	76.5031	3209.01	32.5	638033	3.81591e+06
F1	F	2018-10-11 06:00:00	34.4756	76.5031	3224.99	32	638036	3.81592e+06
F1	F	2018-10-11 06:16:00	34.4755	76.5029	3224.17	33	638019	3.8159e+06
F1	F	2018-10-11 06:30:00	34.4755	76.5029	3238.72	32	638014	3.81591e+06
F1	F	2018-10-11 06:45:00	34.4755	76.503	3211.73	30.5	638026	3.81591e+06
F1	F	2018-10-11 07:00:00	34.4755	76.5032	3181.23	29.5	638042	3.8159e+06
F1	F	2018-10-11 07:15:00	34.4747	76.5031	3214.8	25	638033	3.81582e+06
F1	F	2018-10-11 07:30:00	34.4746	76.5031	3212.75	20.5	638039	3.81581e+06
F1	F	2018-10-11 07:45:00	34.4745	76.5032	3203.43	21.5	638048	3.8158e+06
F1	F	2018-10-11 08:00:00	34.4748	76.5031	3203.73	24	638040	3.81582e+06
F1	F	2018-10-11 08:15:00	34.4749	76.5029	3131.07	27	638020	3.81584e+06
F1	F	2018-10-11 08:30:00	34.475	76.503	3128.37	30	638024	3.81585e+06
F1	F	2018-10-11 08:45:00	34.4754	76.5035	3216.67	29.5	638070	3.81589e+06
F1	F	2018-10-11 09:00:00	34.4747	76.5032	3211.28	28	638042	3.81581e+06
F1	F	2018-10-11 09:15:00	34.4743	76.5031	3208.32	27.5	638042	3.81578e+06
F1	F	2018-10-11 09:30:00	34.4746	76.5034	3224.88	26.5	638065	3.81581e+06
F1	F	2018-10-11 09:45:00	34.4746	76.5031	3210.3	30.5	638040	3.81581e+06
F1	F	2018-10-11 10:00:00	34.4745	76.5033	3253.91	32.5	638053	3.8158e+06
F1	F	2018-10-11 10:15:00	34.4746	76.5031	3212.47	34	638041	3.8158e+06
F1	F	2018-10-11 10:30:00	34.4746	76.5031	3213.36	35	638040	3.8158e+06
F1	F	2018-10-11 10:45:00	34.4745	76.5033	3208.06	29	638060	3.81579e+06
F1	F	2018-10-11 11:00:00	34.4716	76.5041	3221.19	14.5	638133	3.81547e+06
F1	F	2018-10-11 11:15:00	34.4757	76.502	3207.04	12.5	637938	3.81592e+06
F1	F	2018-10-11 11:30:00	34.4753	76.5027	3212.48	13	638002	3.81589e+06
F1	F	2018-10-11 11:45:00	34.4754	76.5028	3232.36	16.5	638010	3.81589e+06
F1	F	2018-10-11 12:00:00	34.4752	76.5029	3214.13	18.5	638017	3.81587e+06
F1	F	2018-10-11 12:15:00	34.4752	76.5029	3207.21	19	638014	3.81587e+06
F1	F	2018-10-11 12:30:00	34.4755	76.5024	3200.36	18	637973	3.81591e+06
F1	F	2018-10-11 12:45:00	34.478	76.4994	3167.43	9	637691	3.81617e+06
F1	F	2018-10-11 13:00:00	34.4795	76.4972	3181.65	4.5	637484	3.81634e+06
F1	F	2018-10-11 13:15:00	34.4775	76.4993	3202.76	4	637688	3.81612e+06
F1	F	2018-10-11 13:31:00	34.4886	76.4997	0.4	4.5	637700	3.81735e+06
F1	F	2018-10-11 13:45:00	34.4725	76.5045	3212.57	3	638165	3.81557e+06
F1	F	2018-10-11 14:00:00	34.4716	76.5039	3228.5	3.5	638119	3.81548e+06
F1	F	2018-10-11 14:15:00	34.4744	76.5021	3242.98	4.5	637945	3.81579e+06
F1	F	2018-10-11 14:30:00	34.4772	76.502	3201.87	2.5	637930	3.81609e+06
F1	F	2018-10-11 14:45:00	34.4782	76.4994	3205.74	1.5	637692	3.81619e+06
F1	F	2018-10-11 15:01:00	34.4773	76.4979	3258.47	2.5	637558	3.8161e+06
F1	F	2018-10-11 15:15:00	34.4752	76.4987	3242.15	2.5	637629	3.81587e+06
F1	F	2018-10-11 15:30:00	34.4734	76.4985	3246.44	2.5	637612	3.81567e+06
F1	F	2018-10-11 15:45:00	34.4736	76.4986	3254.56	7	637621	3.81568e+06
F1	F	2018-10-11 16:00:00	34.4741	76.5016	3288.32	4.5	637901	3.81575e+06
F1	F	2018-10-11 16:16:00	34.4717	76.5035	3259.71	4	638075	3.81549e+06
F1	F	2018-10-11 16:31:00	34.4743	76.5032	3216.33	2.5	638044	3.81577e+06
F1	F	2018-10-11 16:45:00	34.4772	76.5011	3232	0	637846	3.8161e+06
F1	F	2018-10-11 17:00:00	34.478	76.4986	3207.68	0	637615	3.81618e+06
F1	F	2018-10-11 17:15:00	34.4798	76.4949	3248.18	0	637272	3.81637e+06
F1	F	2018-10-11 17:30:00	34.4807	76.4944	3272	1	637230	3.81647e+06
F1	F	2018-10-11 17:45:00	34.4808	76.4957	3197.38	1	637344	3.81648e+06
F1	F	2018-10-11 18:00:00	34.4803	76.496	3218.42	1	637376	3.81643e+06
F1	F	2018-10-11 18:30:00	34.4753	76.4988	3233.31	0.5	637642	3.81588e+06
F1	F	2018-10-11 18:45:00	34.4755	76.5002	3211.5	1	637769	3.8159e+06
F1	F	2018-10-11 19:00:00	34.4764	76.4991	3202.3	1	637669	3.816e+06
F1	F	2018-10-11 19:15:00	34.475	76.5016	3213.17	1.5	637897	3.81584e+06
F1	F	2018-10-11 19:30:00	34.4726	76.5036	3225.28	3	638083	3.81558e+06
F1	F	2018-10-11 19:45:00	34.4729	76.504	3212.65	1.5	638126	3.81562e+06
F1	F	2018-10-11 20:00:00	34.4752	76.5022	3199.64	0	637953	3.81587e+06
F1	F	2018-10-11 20:15:00	34.476	76.5014	3199.38	0	637875	3.81596e+06
F1	F	2018-10-11 20:30:00	34.4777	76.4998	3210.63	0	637725	3.81615e+06
F1	F	2018-10-11 20:45:00	34.476	76.5012	3206.75	0.5	637859	3.81595e+06
F1	F	2018-10-11 21:00:00	34.4797	76.4977	352.77	0	637537	3.81637e+06
F1	F	2018-10-11 21:15:00	34.476	76.5024	3206.77	2.5	637969	3.81596e+06
F1	F	2018-10-11 21:30:00	34.476	76.5023	3204.61	5.5	637966	3.81596e+06
F1	F	2018-10-11 21:45:00	34.476	76.5024	3207.92	7.5	637966	3.81596e+06
F1	F	2018-10-11 22:00:00	34.476	76.5024	3199.55	9	637970	3.81596e+06
F1	F	2018-10-11 22:15:00	34.4761	76.5024	3210.45	10.5	637970	3.81597e+06
F1	F	2018-10-11 22:30:00	34.476	76.5023	3208.25	12	637963	3.81597e+06
F1	F	2018-10-11 22:45:00	34.4743	76.5031	3224.05	7.5	638038	3.81577e+06
F1	F	2018-10-11 23:15:00	34.471	76.5012	3312.53	1.5	637864	3.81541e+06
F1	F	2018-10-11 23:30:00	34.4732	76.498	3284.92	0	637572	3.81564e+06
F1	F	2018-10-11 23:45:00	34.4755	76.4984	3242.94	0.5	637603	3.8159e+06
F1	F	2018-11-11	34.4774	76.4989	3198.19	0.5	637648	3.81611e+06
F1	F	2018-11-11 00:15:00	34.4778	76.501	3206.86	0	637836	3.81616e+06
F1	F	2018-11-11 00:30:00	34.4762	76.5014	3204.03	-1.5	637878	3.81598e+06
F1	F	2018-11-11 00:45:00	34.4755	76.5031	3200.99	1	638033	3.81591e+06
F1	F	2018-11-11 01:00:00	34.4755	76.5031	3207.88	7.5	638033	3.81591e+06
F1	F	2018-11-11 01:15:00	34.4755	76.5031	3209.38	13.5	638033	3.81591e+06
F1	F	2018-11-11 01:30:00	34.4755	76.503	3215.07	15	638028	3.81591e+06
F1	F	2018-11-11 01:45:00	34.4755	76.5031	3202.72	16.5	638037	3.81591e+06
F1	F	2018-11-11 02:00:00	34.4755	76.5032	3175.09	17.5	638041	3.81591e+06
F1	F	2018-11-11 02:15:00	34.4755	76.503	3193.54	25	638031	3.81591e+06
F1	F	2018-11-11 02:30:00	34.4755	76.503	3203.18	29	638028	3.8159e+06
F1	F	2018-11-11 02:45:00	34.4756	76.503	3222.99	31.5	638027	3.81592e+06
F1	F	2018-11-11 03:00:00	34.476	76.5035	2905.21	34	638070	3.81596e+06
F1	F	2018-11-11 03:15:00	34.4755	76.5031	3212.69	32.5	638034	3.81591e+06
F1	F	2018-11-11 03:30:00	34.4755	76.503	3221.44	31	638028	3.8159e+06
F1	F	2018-11-11 03:45:00	34.4755	76.503	3203.23	32.5	638026	3.81591e+06
F1	F	2018-11-11 04:00:00	34.4756	76.5032	3226.06	33.5	638041	3.81592e+06
F1	F	2018-11-11 04:15:00	34.4754	76.503	3210.86	34	638030	3.8159e+06
F1	F	2018-11-11 04:30:00	34.4755	76.503	3217.95	33	638029	3.8159e+06
F1	F	2018-11-11 04:45:00	34.4756	76.503	3218.56	32	638027	3.81592e+06
F1	F	2018-11-11 05:00:00	34.4755	76.5031	3218.93	31	638031	3.81591e+06
F1	F	2018-11-11 05:15:00	34.4754	76.503	3232.79	29.5	638023	3.8159e+06
F1	F	2018-11-11 05:30:00	34.4755	76.5031	3220.1	29.5	638032	3.8159e+06
F1	F	2018-11-11 05:45:00	34.4757	76.503	3222.77	28.5	638024	3.81593e+06
F1	F	2018-11-11 06:00:00	34.4757	76.5029	3261.22	27	638013	3.81593e+06
F1	F	2018-11-11 06:15:00	34.4761	76.5031	3278.4	28.5	638034	3.81597e+06
F1	F	2018-11-11 06:30:00	34.4756	76.5031	3209.47	32.5	638036	3.81591e+06
F1	F	2018-11-11 06:45:00	34.4757	76.503	3242.9	29.5	638030	3.81592e+06
F1	F	2018-11-11 07:00:00	34.4755	76.503	3221.68	28	638026	3.81591e+06
F1	F	2018-11-11 07:16:00	34.4756	76.5031	3208.3	26.5	638032	3.81591e+06
F1	F	2018-11-11 07:30:00	34.4755	76.503	3212.85	23	638029	3.81591e+06
F1	F	2018-11-11 07:45:00	34.4756	76.5031	3220.74	20.5	638037	3.81592e+06
F1	F	2018-11-11 08:00:00	34.4755	76.5031	3212.5	21	638032	3.81591e+06
F1	F	2018-11-11 08:15:00	34.4755	76.503	3212.51	27	638029	3.81591e+06
F1	F	2018-11-11 08:30:00	34.4755	76.503	3228.9	29.5	638028	3.81591e+06
F1	F	2018-11-11 08:45:00	34.4755	76.5031	3227.65	31.5	638034	3.8159e+06
F1	F	2018-11-11 09:00:00	34.4755	76.503	3207.28	31.5	638028	3.81591e+06
F1	F	2018-11-11 09:15:00	34.4755	76.5031	3216.51	29.5	638033	3.81591e+06
F1	F	2018-11-11 09:30:00	34.4754	76.5031	3149	27	638040	3.81589e+06
F1	F	2018-11-11 09:45:00	34.4757	76.5031	3242.73	29.5	638038	3.81592e+06
F1	F	2018-11-11 10:00:00	34.4755	76.5031	3216.47	31	638032	3.81591e+06
F1	F	2018-11-11 10:15:00	34.4755	76.5031	3219.49	31	638031	3.8159e+06
F1	F	2018-11-11 10:30:00	34.4755	76.5031	3205.28	32	638033	3.81591e+06
F1	F	2018-11-11 10:45:00	34.4754	76.5029	3203.68	33.5	638020	3.81589e+06
F1	F	2018-11-11 11:00:00	34.4755	76.503	3220.07	32.5	638028	3.81591e+06
F1	F	2018-11-11 11:15:00	34.4756	76.5031	3207.07	29.5	638032	3.81591e+06
F1	F	2018-11-11 11:30:00	34.4756	76.503	3223.37	30.5	638028	3.81591e+06
F1	F	2018-11-11 11:45:00	34.4757	76.5031	3193.05	33	638033	3.81592e+06
F1	F	2018-11-11 12:00:00	34.4756	76.5032	3201.85	35.5	638041	3.81591e+06
F1	F	2018-11-11 12:15:00	34.4754	76.503	3188.26	36	638029	3.8159e+06
F1	F	2018-11-11 12:30:00	34.4755	76.503	3216.17	35.5	638023	3.81591e+06
F1	F	2018-11-11 12:45:00	34.4744	76.5026	3217.98	18.5	637994	3.81578e+06
F1	F	2018-11-11 13:00:00	34.4718	76.5036	3244.66	10.5	638086	3.8155e+06
F1	F	2018-11-11 13:15:00	34.4742	76.503	3224.56	6.5	638030	3.81576e+06
F1	F	2018-11-11 13:30:00	34.4764	76.5007	3207.98	4.5	637817	3.816e+06
F1	F	2018-11-11 13:45:00	34.4784	76.4981	3216.62	4	637570	3.81622e+06
F1	F	2018-11-11 14:00:00	34.4802	76.4957	3229.6	2.5	637352	3.81642e+06
F1	F	2018-11-11 14:16:00	34.4568	76.4936	0.1	3.5	637189	3.81382e+06
F1	F	2018-11-11 14:31:00	34.478	76.4984	3199.67	4	637600	3.81618e+06
F1	F	2018-11-11 14:46:00	34.4782	76.5003	3203.02	4	637776	3.8162e+06
F1	F	2018-11-11 15:01:00	34.4745	76.5023	3214.14	2.5	637959	3.8158e+06
F1	F	2018-11-11 15:15:00	34.474	76.5029	3220.54	10	638022	3.81573e+06
F1	F	2018-11-11 15:30:00	34.4731	76.5044	3239.53	9	638156	3.81564e+06
F1	F	2018-11-11 15:45:00	34.4725	76.5042	3235.55	7	638142	3.81558e+06
F1	F	2018-11-11 16:00:00	34.4713	76.5024	3295.24	4.5	637981	3.81544e+06
F1	F	2018-11-11 16:15:00	34.4689	76.4984	3378.51	3	637617	3.81517e+06
F1	F	2018-11-11 16:30:00	34.4693	76.4954	3331.2	2.5	637341	3.8152e+06
F1	F	2018-11-11 16:46:00	34.4722	76.4939	3362.15	3	637194	3.81552e+06
F1	F	2018-11-11 17:00:00	34.4736	76.4955	3359.41	3	637339	3.81569e+06
F1	F	2018-11-11 17:15:00	34.4735	76.4954	3359	7.5	637334	3.81568e+06
F1	F	2018-11-11 17:30:00	34.4735	76.4955	3390.66	11.5	637338	3.81568e+06
F1	F	2018-11-11 17:45:00	34.4735	76.4954	3334.71	14.5	637332	3.81568e+06
F1	F	2018-11-11 18:00:00	34.473	76.4952	3412.18	15.5	637319	3.81562e+06
F1	F	2018-11-11 18:15:00	34.4732	76.4953	3334.39	16.5	637320	3.81564e+06
F1	F	2018-11-11 18:30:00	34.473	76.4952	3314.92	16	637317	3.81562e+06
F1	F	2018-11-11 18:45:00	34.4746	76.4957	3303.94	8.5	637356	3.8158e+06
F1	F	2018-11-11 19:00:00	34.4758	76.4981	3244.58	5	637576	3.81594e+06
F1	F	2018-11-11 19:15:00	34.4757	76.4992	3228.26	2.5	637675	3.81592e+06
F1	F	2018-11-11 19:30:00	34.4767	76.5015	3196.18	1.5	637890	3.81603e+06
F1	F	2018-11-11 19:45:00	34.4783	76.5004	3201.01	0	637780	3.81621e+06
F1	F	2018-11-11 20:00:00	34.4754	76.5018	3202.89	0.5	637914	3.8159e+06
F1	F	2018-12-11 03:45:00	34.4754	76.503	3216.76	20.5	638031	3.8159e+06
F1	F	2018-12-11 04:00:00	34.4755	76.5031	3234.87	21.5	638033	3.81591e+06
F1	F	2018-12-11 04:15:00	34.4756	76.5032	3235.46	21.5	638040	3.81591e+06
F1	F	2018-12-11 04:31:00	34.4755	76.5031	3232.02	23	638039	3.8159e+06
F1	F	2018-12-11 04:46:00	34.4755	76.5031	3199.32	23.5	638037	3.8159e+06
F1	F	2018-12-11 05:01:00	34.4755	76.5031	3193.29	24.5	638033	3.8159e+06
F1	F	2018-12-11 05:15:00	34.4755	76.5031	3200.54	24.5	638040	3.8159e+06
F1	F	2018-12-11 05:30:00	34.4755	76.503	3222.71	22.5	638029	3.81591e+06
F1	F	2018-12-11 05:45:00	34.4754	76.5031	3202.03	22.5	638034	3.81589e+06
F1	F	2018-12-11 06:01:00	34.4755	76.503	3213.01	26.5	638024	3.8159e+06
F1	F	2018-12-11 06:15:00	34.4755	76.503	3204.22	29.5	638025	3.81591e+06
F1	F	2018-12-11 06:30:00	34.4755	76.503	3226.83	32	638027	3.8159e+06
F1	F	2018-12-11 06:45:00	34.4753	76.5031	3220.67	32	638035	3.81588e+06
F1	F	2018-12-11 07:00:00	34.4755	76.503	3223.38	34	638026	3.8159e+06
F1	F	2018-12-11 07:15:00	34.4755	76.5031	3221.42	33	638034	3.81591e+06
F1	F	2018-12-11 07:30:00	34.4756	76.5032	3205.77	32	638040	3.81591e+06
F1	F	2018-12-11 07:45:00	34.4755	76.503	3217.56	32	638031	3.8159e+06
F1	F	2018-12-11 08:00:00	34.4754	76.503	3219.05	31.5	638025	3.81589e+06
F1	F	2018-12-11 08:15:00	34.4755	76.503	3197	29	638026	3.81591e+06
F1	F	2018-12-11 08:30:00	34.4749	76.503	3194.95	27.5	638026	3.81584e+06
F1	F	2018-12-11 08:45:00	34.4755	76.5031	3200.88	28	638037	3.8159e+06
F1	F	2018-12-11 09:00:00	34.4755	76.503	3241.87	27	638029	3.81591e+06
F1	F	2018-12-11 09:15:00	34.4755	76.5031	3215.57	27.5	638032	3.8159e+06
F1	F	2018-12-11 09:30:00	34.4755	76.5031	3221.13	28	638036	3.81591e+06
F1	F	2018-12-11 09:45:00	34.4755	76.503	3216.52	28.5	638030	3.8159e+06
F1	F	2018-12-11 10:00:00	34.4755	76.503	3220.17	30.5	638028	3.81591e+06
F1	F	2018-12-11 10:15:00	34.4755	76.5031	3212.41	32.5	638033	3.81591e+06
F1	F	2018-12-11 10:30:00	34.4756	76.5031	3197.92	32.5	638033	3.81591e+06
F1	F	2018-12-11 10:45:00	34.4754	76.503	3243.38	31.5	638030	3.81589e+06
F1	F	2018-12-11 11:00:00	34.4755	76.503	3211.66	32	638031	3.8159e+06
F1	F	2018-12-11 11:15:00	34.4755	76.5032	3198.88	31.5	638041	3.81591e+06
F1	F	2018-12-11 12:01:00	34.4724	76.5042	3172.99	14	638138	3.81556e+06
F1	F	2018-12-11 12:16:00	34.4716	76.5044	3218.53	14	638161	3.81547e+06
F1	F	2018-12-11 12:30:00	34.4702	76.5013	3307.84	7.5	637882	3.81531e+06
F1	F	2018-12-11 13:01:00	34.4785	76.4979	3097.04	4.5	637552	3.81623e+06
F1	F	2018-12-11 13:15:00	34.4778	76.5006	3215.76	2.5	637803	3.81616e+06
F1	F	2018-12-11 13:30:00	34.4777	76.5017	3205.55	1	637899	3.81615e+06
F1	F	2018-12-11 13:45:00	34.4741	76.503	3214.93	0	638030	3.81575e+06
F1	F	2018-12-11 14:00:00	34.4717	76.5043	3226.02	0	638151	3.81548e+06
F1	F	2018-12-11 14:15:00	34.472	76.5041	3230.18	4	638131	3.81552e+06
F1	F	2018-12-11 14:30:00	34.472	76.504	3232.56	8	638128	3.81552e+06
F1	F	2018-12-11 14:46:00	34.4723	76.5042	3221.11	9.5	638144	3.81555e+06
F1	F	2018-12-11 15:00:00	34.4727	76.5037	3211.18	3	638094	3.81559e+06
F1	F	2018-12-11 15:16:00	34.4752	76.5009	3186.6	3.5	637831	3.81586e+06
F1	F	2018-12-11 15:30:00	34.478	76.4985	3192.31	2	637613	3.81617e+06
F1	F	2018-12-11 15:45:00	34.48	76.4949	3206.69	0.5	637274	3.81639e+06
F1	F	2018-12-11 16:00:00	34.4804	76.4955	3220.81	1	637328	3.81644e+06
F1	F	2018-12-11 16:15:00	34.4797	76.4957	3206.56	8.5	637345	3.81637e+06
F1	F	2018-12-11 16:30:00	34.4788	76.4975	3219.55	6.5	637514	3.81626e+06
F1	F	2018-12-11 16:45:00	34.4771	76.4984	3203.24	2.5	637602	3.81608e+06
F1	F	2018-12-11 17:00:00	34.4785	76.5005	3208.19	1	637790	3.81623e+06
F1	F	2018-12-11 17:15:00	34.4757	76.5024	3207.82	0	637970	3.81593e+06
F1	F	2018-12-11 17:30:00	34.4756	76.5023	3225.07	5	637964	3.81592e+06
F1	F	2018-12-11 17:45:00	34.4756	76.5023	3209.65	12.5	637961	3.81592e+06
F1	F	2018-12-11 18:00:00	34.4756	76.5023	3207.67	16.5	637959	3.81592e+06
F1	F	2018-12-11 18:15:00	34.4754	76.5023	3204.5	14.5	637966	3.8159e+06
F1	F	2018-12-11 18:30:00	34.4713	76.5044	3223.45	5	638162	3.81544e+06
F1	F	2018-12-11 18:45:00	34.4723	76.5047	3209.14	1.5	638190	3.81555e+06
F1	F	2018-12-11 19:00:00	34.4738	76.5055	3261.39	-1.5	638258	3.81572e+06
F1	F	2018-12-11 19:15:00	34.4724	76.5039	3216.46	2.5	638112	3.81556e+06
F1	F	2018-12-11 19:30:00	34.4725	76.5041	3256.83	5	638129	3.81558e+06
F1	F	2018-12-11 19:45:00	34.4713	76.5036	3239.88	3	638085	3.81544e+06
F1	F	2018-12-11 20:00:00	34.4729	76.5063	3238.14	0	638331	3.81563e+06
F1	F	2018-12-11 20:15:00	34.4708	76.5081	3226.35	-1	638500	3.8154e+06
F1	F	2018-12-11 20:30:00	34.4718	76.5063	3132.1	-2.5	638331	3.8155e+06
F1	F	2018-12-11 20:45:00	34.4717	76.5052	3195.74	-2	638237	3.81548e+06
F1	F	2018-12-11 21:00:00	34.4717	76.5052	3182.77	-0.5	638236	3.81548e+06
F1	F	11-13-18 3:15 AM	34.4754	76.503	3200.87	29	638027	3.81589e+06
F1	F	11-13-18 3:30 AM	34.4756	76.5031	3201.88	30	638033	3.81592e+06
F1	F	11-13-18 3:45 AM	34.4755	76.503	3229.67	28.5	638024	3.81591e+06
F1	F	11-13-18 4:00 AM	34.4755	76.503	3231.06	25.5	638028	3.81591e+06
F1	F	11-13-18 4:15 AM	34.4755	76.503	3220.93	25.5	638027	3.8159e+06
F1	F	11-13-18 4:30 AM	34.4746	76.5023	3255.52	23.5	637960	3.81581e+06
F1	F	11-13-18 4:45 AM	34.4752	76.5028	3185.7	20.5	638011	3.81587e+06
F1	F	11-13-18 5:00 AM	34.4752	76.5028	3215.8	22	638013	3.81587e+06
F1	F	11-13-18 5:15 AM	34.4753	76.5029	3201.9	24	638017	3.81588e+06
F1	F	11-13-18 5:30 AM	34.4752	76.5029	3218.58	24.5	638015	3.81587e+06
F1	F	11-13-18 5:45 AM	34.4752	76.5029	3202.75	26	638019	3.81587e+06
F1	F	11-13-18 6:00 AM	34.4753	76.5029	3216.21	27	638015	3.81588e+06
F1	F	11-13-18 6:15 AM	34.4751	76.5028	3199.76	26.5	638011	3.81586e+06
F1	F	11-13-18 6:30 AM	34.4752	76.5028	3198.43	26.5	638012	3.81587e+06
F1	F	11-13-18 6:45 AM	34.4752	76.5028	3204.72	26	638010	3.81587e+06
F1	F	11-13-18 7:00 AM	34.4752	76.5028	3189.16	26.5	638006	3.81587e+06
F1	F	11-13-18 7:15 AM	34.4753	76.5027	3164.63	27	638001	3.81588e+06
F1	F	11-13-18 7:30 AM	34.4752	76.5029	3228.73	26	638013	3.81587e+06
F1	F	11-13-18 7:45 AM	34.4752	76.5028	3236.71	28	638012	3.81587e+06
F1	F	11-13-18 8:00 AM	34.4751	76.5028	3214.55	30.5	638006	3.81586e+06
F1	F	11-13-18 8:15 AM	34.4749	76.5028	3252.3	31	638010	3.81584e+06
F1	F	11-13-18 8:30 AM	34.4752	76.5028	3228.56	32	638009	3.81587e+06
F1	F	11-13-18 8:45 AM	34.4752	76.5028	3218.25	30.5	638012	3.81587e+06
F1	F	11-13-18 9:00 AM	34.4752	76.5028	3203.17	31	638008	3.81587e+06
F1	F	11-13-18 9:15 AM	34.4752	76.5029	3203.9	30.5	638016	3.81587e+06
F1	F	11-13-18 9:30 AM	34.4751	76.5027	3195.79	28	638001	3.81586e+06
F1	F	11-13-18 9:45 AM	34.4754	76.5027	3171.57	26	637999	3.8159e+06
F1	F	11-13-18 10:00 AM	34.4751	76.5029	3206.92	25	638015	3.81586e+06
F1	F	11-13-18 10:15 AM	34.4751	76.5028	3215.33	24.5	638013	3.81586e+06
F1	F	11-13-18 10:30 AM	34.4751	76.5028	3217.08	24.5	638011	3.81586e+06
F1	F	11-13-18 10:45 AM	34.4751	76.5028	3208.3	24	638012	3.81586e+06
F1	F	11-13-18 11:00 AM	34.4751	76.5027	3219.82	24	637998	3.81586e+06
F1	F	11-13-18 11:15 AM	34.4752	76.5028	3199.29	24.5	638011	3.81587e+06
F1	F	11-13-18 11:30 AM	34.4752	76.5028	3210.7	24.5	638013	3.81587e+06
F1	F	11-13-18 11:45 AM	34.475	76.5027	3134.08	25	637996	3.81585e+06
F1	F	11-13-18 12:00 PM	34.4752	76.5029	3221.6	30	638014	3.81587e+06
F1	F	11-13-18 1:45 PM	34.4713	76.499	3322.82	4.5	637670	3.81543e+06
F1	F	11-13-18 2:00 PM	34.4719	76.5028	3279.54	3	638018	3.81551e+06
F1	F	11-13-18 2:46 PM	34.4729	76.5135	0.38	17	638994	3.81563e+06
F1	F	11-13-18 3:16 PM	34.4713	76.5045	3226.3	11	638172	3.81544e+06
F1	F	11-13-18 3:30 PM	34.4725	76.5044	3231.75	6	638160	3.81558e+06
F1	F	11-13-18 3:45 PM	34.4734	76.5026	3255.27	4	637992	3.81567e+06
F1	F	11-13-18 4:00 PM	34.4751	76.5023	3207.03	2.5	637960	3.81587e+06
F1	F	11-13-18 4:15 PM	34.4758	76.5017	3218.2	2	637904	3.81594e+06
F1	F	11-13-18 4:30 PM	34.476	76.5004	3202.83	2	637783	3.81596e+06
F1	F	11-13-18 4:45 PM	34.4771	76.4995	3185.15	1.5	637706	3.81608e+06
F1	F	11-13-18 5:00 PM	34.4782	76.5001	3202.63	1.5	637752	3.8162e+06
F1	F	11-13-18 5:15 PM	34.4759	76.5011	3184.48	2	637848	3.81595e+06
F1	F	11-13-18 5:30 PM	34.4744	76.5025	3214.9	2.5	637984	3.81579e+06
F1	F	11-13-18 5:45 PM	34.4743	76.5018	3243.88	2	637919	3.81578e+06
F1	F	11-13-18 6:00 PM	34.4769	76.5014	3200.17	2	637881	3.81606e+06
F1	F	11-13-18 6:15 PM	34.4793	76.4968	3189.04	1.5	637452	3.81632e+06
F1	F	11-13-18 6:30 PM	34.4795	76.4958	3196.09	4.5	637359	3.81634e+06
F1	F	11-13-18 6:45 PM	34.4795	76.4956	3204.46	6.5	637343	3.81634e+06
F1	F	11-13-18 7:00 PM	34.4803	76.4959	3198.92	2.5	637366	3.81643e+06
F1	F	11-13-18 7:15 PM	34.4787	76.4971	3177.98	1.5	637476	3.81625e+06
F1	F	11-13-18 7:30 PM	34.4768	76.4983	3209.79	1.5	637595	3.81605e+06
F1	F	11-13-18 7:45 PM	34.4767	76.4985	3209.96	1	637612	3.81604e+06
F1	F	11-13-18 8:00 PM	34.4772	76.4987	3210.12	8.5	637627	3.81609e+06
F1	F	11-13-18 8:15 PM	34.4767	76.4999	3209.8	13	637743	3.81603e+06
F1	F	11-13-18 8:30 PM	34.4783	76.5008	3211.49	4.5	637820	3.81621e+06
F1	F	11-13-18 8:45 PM	34.4763	76.5024	3185.09	1.5	637971	3.81599e+06
F1	F	11-13-18 9:00 PM	34.4734	76.5038	3326.7	-1.5	638099	3.81567e+06
F1	F	11-13-18 9:15 PM	34.4716	76.5053	3205.5	-1	638241	3.81548e+06
F1	F	11-13-18 9:30 PM	34.4716	76.5053	3218.62	0	638240	3.81548e+06
F1	F	11-13-18 9:45 PM	34.4716	76.5053	3207.8	1	638242	3.81548e+06
F1	F	11-13-18 10:00 PM	34.4716	76.5053	3230.42	0	638241	3.81548e+06
F1	F	11-13-18 10:15 PM	34.4724	76.5041	3232.82	1	638129	3.81556e+06
F1	F	11-13-18 10:30 PM	34.472	76.504	3231.39	2	638124	3.81552e+06
F1	F	11-13-18 10:45 PM	34.4719	76.504	3231.91	5	638126	3.81551e+06
F1	F	11-13-18 11:00 PM	34.4714	76.5039	3228.8	8	638118	3.81545e+06
F1	F	11-13-18 11:15 PM	34.472	76.5041	3235.28	11	638131	3.81552e+06
F1	F	11-13-18 11:30 PM	34.472	76.504	3219.53	12.5	638128	3.81552e+06
F1	F	11-13-18 11:45 PM	34.4714	76.5027	3283.25	13.5	638007	3.81545e+06
F1	F	11-14-18 12:00 AM	34.4729	76.5038	3211.66	7.5	638101	3.81562e+06
F1	F	11-14-18 12:15 AM	34.4751	76.5028	3192.38	7.5	638004	3.81586e+06
F1	F	11-14-18 12:30 AM	34.4751	76.5032	3269	18	638047	3.81586e+06
F1	F	11-14-18 12:45 AM	34.4752	76.5029	3212.07	24.5	638013	3.81587e+06
F1	F	11-14-18 1:00 AM	34.4752	76.5029	3227.03	28	638013	3.81587e+06
F1	F	11-14-18 1:15 AM	34.4752	76.5028	3211.09	28	638011	3.81587e+06
F1	F	11-14-18 1:30 AM	34.4752	76.5029	3208.01	27.5	638014	3.81587e+06
F1	F	11-14-18 1:45 AM	34.4752	76.5029	3204.5	27	638017	3.81587e+06
F1	F	11-14-18 2:00 AM	34.4751	76.5029	3202.19	27	638019	3.81587e+06
F1	F	11-14-18 2:15 AM	34.4752	76.5028	3196.1	27.5	638004	3.81588e+06
F1	F	11-14-18 2:30 AM	34.475	76.5031	3280.34	29	638034	3.81585e+06
F1	F	11-14-18 2:45 AM	34.4752	76.5028	3209.33	28	638013	3.81587e+06
F1	F	11-14-18 3:00 AM	34.4751	76.5028	3216.56	26.5	638012	3.81586e+06
F1	F	11-14-18 3:15 AM	34.4751	76.5028	3206.7	25.5	638012	3.81586e+06
F1	F	11-14-18 3:30 AM	34.4752	76.5028	3210.89	25.5	638012	3.81587e+06
F1	F	11-14-18 3:45 AM	34.4752	76.5029	3210.69	22.5	638016	3.81587e+06
F1	F	11-14-18 4:00 AM	34.4752	76.5028	3191.87	22.5	638012	3.81587e+06
F1	F	11-14-18 4:15 AM	34.4752	76.5028	3203.25	23	638011	3.81587e+06
F1	F	11-14-18 4:45 AM	34.4751	76.5028	3221.56	24.5	638012	3.81587e+06
F1	F	11-14-18 5:00 AM	34.4753	76.5028	3209.85	22.5	638011	3.81588e+06
F1	F	11-14-18 5:15 AM	34.4752	76.5028	3217.36	20.5	638012	3.81587e+06
F1	F	11-14-18 5:30 AM	34.4752	76.5028	3204.91	18.5	638009	3.81587e+06
F1	F	11-14-18 5:45 AM	34.4751	76.5027	3215.9	17	638000	3.81586e+06
F1	F	11-14-18 6:00 AM	34.4756	76.503	3302.08	20.5	638031	3.81592e+06
F1	F	11-14-18 6:15 AM	34.4751	76.5029	3214.75	27.5	638015	3.81586e+06
F1	F	11-14-18 6:30 AM	34.4751	76.5029	3214.45	27.5	638020	3.81586e+06
F1	F	11-14-18 6:45 AM	34.4754	76.5028	3264.18	25.5	638010	3.81589e+06
F1	F	11-14-18 7:01 AM	34.4751	76.5028	3205.7	23.5	638013	3.81586e+06
F1	F	11-14-18 7:15 AM	34.4751	76.5028	3191.61	22	638008	3.81586e+06
F1	F	11-14-18 7:30 AM	34.4752	76.5028	3207.07	22	638013	3.81587e+06
F1	F	11-14-18 7:45 AM	34.4752	76.5028	3219.97	22.5	638009	3.81587e+06
F1	F	11-14-18 8:00 AM	34.475	76.503	3248.71	20.5	638024	3.81585e+06
F1	F	11-14-18 8:15 AM	34.4752	76.503	3223.68	20.5	638025	3.81587e+06
F1	F	11-14-18 8:30 AM	34.475	76.5029	3244.32	22	638022	3.81585e+06
F1	F	11-14-18 8:45 AM	34.475	76.5029	3242.51	21.5	638015	3.81585e+06
F1	F	11-14-18 9:00 AM	34.475	76.5028	3222.43	22	638008	3.81585e+06
F1	F	11-14-18 9:15 AM	34.4751	76.5029	3214.61	21.5	638015	3.81586e+06
F1	F	11-14-18 9:30 AM	34.4745	76.503	3220.41	18	638025	3.81579e+06
F1	F	11-14-18 9:45 AM	34.4746	76.5031	3218.23	21.5	638040	3.8158e+06
F1	F	11-14-18 9:59 AM	34.4746	76.5032	3209.85	27	638047	3.81581e+06
F1	F	11-14-18 10:15 AM	34.4746	76.5032	3195.88	31	638046	3.8158e+06
F1	F	11-14-18 10:29 AM	34.4744	76.5033	3217.32	33	638056	3.81578e+06
F1	F	11-14-18 10:45 AM	34.4746	76.5032	3233.39	33.5	638049	3.8158e+06
F1	F	11-14-18 11:00 AM	34.4767	76.5022	3169.61	31	637953	3.81603e+06
F1	F	11-14-18 11:15 AM	34.4747	76.5032	3207.12	30	638043	3.81581e+06
F1	F	11-14-18 11:30 AM	34.4746	76.5032	3206.65	28.5	638043	3.8158e+06
F1	F	11-14-18 11:45 AM	34.4746	76.5031	3205.96	27.5	638039	3.81581e+06
F1	F	11-14-18 12:00 PM	34.4745	76.5031	3194.92	26.5	638038	3.8158e+06
F1	F	11-14-18 12:15 PM	34.4747	76.5032	3230.84	25	638048	3.81582e+06
F1	F	11-14-18 12:30 PM	34.4745	76.5028	3207.05	27	638012	3.81579e+06
F1	F	11-14-18 12:45 PM	34.4713	76.5039	3236.35	17	638120	3.81544e+06
F1	F	11-14-18 1:00 PM	34.4704	76.5005	3317.71	8.5	637802	3.81534e+06
F1	F	11-14-18 1:15 PM	34.4687	76.4972	3376.39	4.5	637505	3.81515e+06
F1	F	11-14-18 1:30 PM	34.4712	76.4979	3359.3	2.5	637561	3.81542e+06
F1	F	11-14-18 1:46 PM	34.4786	76.5084	-0.08	3	638516	3.81626e+06
F1	F	11-14-18 2:00 PM	34.4754	76.5014	3203.25	3	637882	3.81589e+06
F1	F	11-14-18 2:15 PM	34.4763	76.5024	3209.64	3	637970	3.81599e+06
F1	F	11-14-18 2:30 PM	34.4754	76.5018	3225.22	3.5	637914	3.8159e+06
F1	F	11-14-18 2:46 PM	34.472	76.504	3211.58	4.5	638121	3.81552e+06
F1	F	11-14-18 3:00 PM	34.472	76.504	3223.85	11	638122	3.81552e+06
F1	F	11-14-18 3:15 PM	34.4723	76.5046	3364.78	11.5	638179	3.81555e+06
F1	F	11-14-18 3:30 PM	34.4716	76.5056	3298.27	6	638269	3.81548e+06
F1	F	11-14-18 3:45 PM	34.4717	76.5053	3209.32	4	638240	3.81548e+06
F1	F	11-14-18 4:00 PM	34.4728	76.5032	3233.18	2.5	638052	3.8156e+06
F1	F	11-14-18 4:15 PM	34.4775	76.5086	3478.48	5	638541	3.81613e+06
F1	F	11-14-18 4:46 PM	34.4465	76.4935	0.25	11	637202	3.81268e+06
F1	F	11-14-18 7:01 PM	34.4486	76.4311	-0.01	24	631468	3.81282e+06
F1	F	11-14-18 7:16 PM	34.47	76.5316	0.42	21	640659	3.81533e+06
F1	F	11-14-18 7:30 PM	34.4722	76.5044	3208.78	11.5	638161	3.81554e+06
F1	F	11-14-18 7:44 PM	34.4767	76.5019	3238.38	5	637927	3.81604e+06
F1	F	11-14-18 8:01 PM	34.4785	76.4984	3191.92	3.5	637599	3.81623e+06
F1	F	11-14-18 8:15 PM	34.4777	76.4974	3243.97	1.5	637507	3.81614e+06
F1	F	11-14-18 8:31 PM	34.4858	76.4934	-0.13	2.5	637129	3.81704e+06
F1	F	11-14-18 8:46 PM	34.4776	76.5	3203.63	2	637745	3.81614e+06
F1	F	11-14-18 9:01 PM	34.4757	76.5023	3202.42	1	637961	3.81593e+06
F1	F	11-14-18 9:15 PM	34.4731	76.5035	3202.43	0.5	638080	3.81564e+06
F1	F	11-14-18 9:30 PM	34.4723	76.5043	3220.11	0.5	638148	3.81555e+06
F1	F	11-14-18 9:45 PM	34.4723	76.5043	3218.88	5.5	638148	3.81555e+06
F1	F	11-14-18 10:00 PM	34.4729	76.505	3212.57	2	638213	3.81561e+06
F1	F	11-14-18 10:15 PM	34.4716	76.5052	3210.18	0	638238	3.81548e+06
F1	F	11-14-18 10:30 PM	34.4717	76.5052	3219.9	0.5	638238	3.81548e+06
F1	F	11-14-18 10:45 PM	34.4714	76.5054	3225.04	1	638255	3.81545e+06
F1	F	11-14-18 11:00 PM	34.4729	76.5042	3212.7	1	638140	3.81562e+06
F1	F	11-14-18 11:15 PM	34.4723	76.5038	3225.49	1.5	638108	3.81556e+06
F1	F	11-14-18 11:30 PM	34.4723	76.5039	3231.13	10.5	638113	3.81555e+06
F1	F	11-14-18 11:44 PM	34.4723	76.504	3248.34	14.5	638119	3.81555e+06
F1	F	11-14-18 11:59 PM	34.4724	76.5039	3239.63	12	638110	3.81556e+06
F1	F	11-15-18 12:14 AM	34.4723	76.5038	3230.3	11.5	638109	3.81555e+06
F1	F	11-15-18 12:30 AM	34.472	76.5036	3252.15	7	638086	3.81552e+06
F1	F	11-15-18 12:45 AM	34.4728	76.502	3298.66	3	637943	3.8156e+06
F1	F	11-15-18 1:00 AM	34.4753	76.5028	3311.53	0	638006	3.81588e+06
F1	F	11-15-18 1:16 AM	34.4751	76.5029	3200.45	6	638018	3.81586e+06
F1	F	11-15-18 1:30 AM	34.4752	76.5028	3204.21	11	638006	3.81587e+06
F1	F	11-15-18 1:45 AM	34.4751	76.5029	3211.17	14	638014	3.81587e+06
F1	F	11-15-18 2:00 AM	34.4751	76.5029	3203.95	13	638014	3.81586e+06
F1	F	11-15-18 2:15 AM	34.4752	76.5029	3213.05	12	638015	3.81587e+06
F1	F	11-15-18 2:30 AM	34.4752	76.5029	3223.48	11.5	638016	3.81587e+06
F1	F	11-15-18 2:45 AM	34.4752	76.5029	3207.15	14	638015	3.81587e+06
F1	F	11-15-18 3:00 AM	34.4752	76.5029	3204.65	16	638015	3.81587e+06
F1	F	11-15-18 3:15 AM	34.4752	76.5029	3208.1	16.5	638013	3.81587e+06
F1	F	11-15-18 3:30 AM	34.4752	76.5029	3227.48	16	638020	3.81587e+06
F1	F	11-15-18 3:45 AM	34.4752	76.5029	3214	15.5	638013	3.81587e+06
F1	F	11-15-18 4:00 AM	34.4752	76.5029	3226.45	20	638016	3.81587e+06
F1	F	11-15-18 4:30 AM	34.4752	76.503	3181.21	26	638025	3.81587e+06
F1	F	11-15-18 4:45 AM	34.4752	76.5029	3201.25	23	638015	3.81587e+06
F1	F	11-15-18 5:00 AM	34.4751	76.5029	3214.75	21.5	638015	3.81586e+06
F1	F	11-15-18 5:15 AM	34.4752	76.5029	3207.21	21.5	638014	3.81587e+06
F1	F	11-15-18 5:30 AM	34.4752	76.5028	3219.53	22.5	638013	3.81587e+06
F1	F	11-15-18 5:45 AM	34.4752	76.5027	3231.65	23.5	638003	3.81587e+06
F1	F	11-15-18 6:00 AM	34.4752	76.5028	3195.7	23.5	638012	3.81587e+06
F1	F	11-15-18 6:15 AM	34.4751	76.5028	3198.01	23	638013	3.81587e+06
F1	F	11-15-18 6:30 AM	34.4751	76.5029	3213.15	23	638015	3.81587e+06
F1	F	11-15-18 6:45 AM	34.4752	76.5028	3205.39	22	638007	3.81587e+06
F1	F	11-15-18 7:00 AM	34.4752	76.5028	3216.99	21.5	638011	3.81587e+06
F1	F	11-15-18 7:15 AM	34.4752	76.5028	3207.83	22.5	638012	3.81587e+06
F1	F	11-15-18 7:30 AM	34.4751	76.5029	3204.55	21.5	638018	3.81586e+06
F1	F	11-15-18 7:45 AM	34.4751	76.5028	3213.97	20.5	638009	3.81586e+06
F1	F	11-15-18 8:00 AM	34.4751	76.5027	3218.95	19.5	638003	3.81587e+06
F1	F	11-15-18 8:15 AM	34.475	76.5029	3253.11	18	638020	3.81585e+06
F1	F	11-15-18 8:30 AM	34.4751	76.5029	3218.86	18.5	638016	3.81587e+06
F1	F	11-15-18 8:45 AM	34.4752	76.5028	3193.83	19	638007	3.81587e+06
F1	F	11-15-18 8:59 AM	34.4752	76.503	3227.51	20.5	638024	3.81587e+06
F1	F	11-15-18 9:15 AM	34.4751	76.5029	3213.76	20	638016	3.81587e+06
F1	F	11-15-18 9:30 AM	34.4752	76.5031	3231.68	18	638033	3.81587e+06
F1	F	11-15-18 9:45 AM	34.4756	76.5033	3200.35	13.5	638050	3.81591e+06
F1	F	11-15-18 10:00 AM	34.4759	76.502	3195	10.5	637937	3.81595e+06
F1	F	11-15-18 10:15 AM	34.475	76.5021	3218.38	7	637942	3.81585e+06
F1	F	11-15-18 10:30 AM	34.4752	76.5013	3210.85	5	637869	3.81587e+06
F1	F	11-15-18 10:45 AM	34.4764	76.5016	3207.95	4.5	637900	3.81601e+06
F1	F	11-15-18 11:00 AM	34.475	76.5021	3284.4	8.5	637944	3.81584e+06
F1	F	11-15-18 11:15 AM	34.4747	76.5017	3242.58	16.5	637911	3.81581e+06
F1	F	11-15-18 11:30 AM	34.4749	76.502	3213.12	25.5	637937	3.81584e+06
F1	F	11-15-18 11:45 AM	34.4749	76.5021	3216.92	26	637942	3.81584e+06
F1	F	11-15-18 12:00 PM	34.4749	76.502	3218.78	25.5	637937	3.81584e+06
F1	F	11-15-18 12:15 PM	34.4748	76.502	3174.8	24.5	637936	3.81583e+06
F1	F	11-15-18 12:29 PM	34.475	76.5019	3268.17	21.5	637930	3.81585e+06
F1	F	11-15-18 12:45 PM	34.4748	76.502	3209.44	19	637939	3.81582e+06
F1	F	11-15-18 1:01 PM	34.4732	76.5029	2902.58	10	638024	3.81564e+06
F1	F	11-15-18 1:16 PM	34.474	76.503	3213.99	5	638032	3.81574e+06
F1	F	11-15-18 1:30 PM	34.478	76.5006	3198.5	0.5	637799	3.81617e+06
F1	F	11-15-18 1:45 PM	34.4774	76.4975	3216.15	0	637515	3.81611e+06
F1	F	11-15-18 2:01 PM	34.4751	76.5001	3277.04	1	637764	3.81585e+06
F1	F	11-15-18 2:15 PM	34.4739	76.5002	3296.42	1	637770	3.81572e+06
F1	F	11-15-18 2:30 PM	34.472	76.502	3297.19	2.5	637943	3.81552e+06
F1	F	11-15-18 2:45 PM	34.4717	76.5041	3238.91	0.5	638138	3.81548e+06
F1	F	11-15-18 3:00 PM	34.4718	76.5052	3215.04	0	638235	3.81549e+06
F1	F	11-15-18 3:15 PM	34.4746	76.504	3216.99	-2.5	638120	3.81581e+06
F1	F	11-15-18 3:30 PM	34.4731	76.5039	3212.93	-2.5	638111	3.81564e+06
F1	F	11-15-18 3:45 PM	34.4736	76.5043	3226.13	-3	638148	3.8157e+06
F1	F	11-15-18 4:00 PM	34.4733	76.5046	3207.84	-3	638172	3.81567e+06
F1	F	11-15-18 4:15 PM	34.4741	76.5044	3203.6	-4.5	638159	3.81575e+06
F1	F	11-15-18 4:30 PM	34.4725	76.504	3229.31	-2	638119	3.81557e+06
F1	F	11-15-18 4:45 PM	34.4724	76.504	3217.12	4	638124	3.81557e+06
F1	F	11-15-18 5:00 PM	34.4725	76.5041	3218.84	8.5	638128	3.81557e+06
F1	F	11-15-18 5:15 PM	34.4725	76.5039	3224.42	18	638116	3.81557e+06
F1	F	11-15-18 5:30 PM	34.4724	76.5039	3227.81	24.5	638116	3.81557e+06
F1	F	11-15-18 5:45 PM	34.4724	76.5039	3226.97	28.5	638114	3.81557e+06
F1	F	11-15-18 6:00 PM	34.4725	76.5039	3235.56	31	638114	3.81557e+06
F1	F	11-15-18 6:14 PM	34.4725	76.504	3245.28	25.5	638126	3.81557e+06
F1	F	11-15-18 6:30 PM	34.4725	76.5039	3227.34	24.5	638115	3.81557e+06
F1	F	11-15-18 6:44 PM	34.4727	76.5041	3257.39	20	638129	3.81559e+06
F1	F	11-15-18 7:00 PM	34.4724	76.5036	3245.77	7	638085	3.81556e+06
F1	F	11-15-18 7:15 PM	34.4751	76.5011	3230.02	2	637857	3.81586e+06
F1	F	11-15-18 7:30 PM	34.4759	76.5005	3200.28	0	637798	3.81595e+06
F1	F	11-15-18 7:45 PM	34.4766	76.4996	3180.39	-2.5	637709	3.81602e+06
F1	F	11-15-18 8:00 PM	34.4762	76.5011	3196.67	-3	637853	3.81598e+06
F1	F	11-15-18 8:15 PM	34.4766	76.501	3203.06	-4.5	637844	3.81603e+06
F1	F	11-15-18 8:30 PM	34.4749	76.5035	3212.28	-5.5	638074	3.81584e+06
F1	F	11-15-18 8:46 PM	34.4756	76.5033	3205.4	-4	638052	3.81592e+06
F1	F	11-15-18 9:00 PM	34.4741	76.5032	3217.76	-2.5	638043	3.81575e+06
F1	F	11-15-18 9:15 PM	34.4722	76.5042	3223.26	-2.5	638137	3.81554e+06
F1	F	11-15-18 9:30 PM	34.4716	76.5042	3222.43	-2.5	638140	3.81548e+06
F1	F	11-15-18 9:45 PM	34.4719	76.5046	3213.67	-2.5	638183	3.81551e+06
F1	F	11-15-18 10:00 PM	34.4742	76.5028	3220.62	-2	638008	3.81576e+06
F1	F	11-15-18 10:15 PM	34.4741	76.5028	3228.54	1.5	638011	3.81575e+06
F1	F	11-15-18 10:30 PM	34.4742	76.5028	3233.75	4.5	638008	3.81576e+06
F1	F	11-15-18 10:45 PM	34.4784	76.5	3187.23	-1	637742	3.81623e+06
F1	F	11-15-18 11:00 PM	34.4787	76.5002	3198.65	-3.5	637764	3.81626e+06
F1	F	11-15-18 11:15 PM	34.4766	76.4989	3205.41	-5	637644	3.81602e+06
F1	F	11-15-18 11:30 PM	34.4771	76.5013	3201.5	-5.5	637864	3.81608e+06
F1	F	11-15-18 11:45 PM	34.4774	76.5028	3204.95	-6	638001	3.81611e+06
F1	F	11-16-18 12:00 AM	34.4768	76.5029	3214.2	-7	638019	3.81605e+06
F1	F	11-16-18 2:45 AM	34.4755	76.503	3194.67	24.5	638031	3.8159e+06
F1	F	11-16-18 3:00 AM	34.4755	76.503	3228.04	22	638029	3.81591e+06
F1	F	11-16-18 3:15 AM	34.4755	76.5031	3215.45	21	638039	3.81591e+06
F1	F	11-16-18 3:30 AM	34.4755	76.5032	3191.37	20.5	638043	3.81591e+06
F1	F	11-16-18 3:45 AM	34.4756	76.5031	3226.57	21	638032	3.81591e+06
F1	F	11-16-18 4:00 AM	34.4755	76.5031	3203.53	22	638035	3.8159e+06
F1	F	11-16-18 4:15 AM	34.4755	76.5031	3211.31	22	638037	3.8159e+06
F1	F	11-16-18 4:30 AM	34.4754	76.5031	3204.75	22.5	638037	3.8159e+06
F1	F	11-16-18 4:45 AM	34.4754	76.5032	3256.71	24.5	638049	3.8159e+06
F1	F	11-16-18 5:00 AM	34.4757	76.5031	3154.82	24	638035	3.81593e+06
F1	F	11-16-18 5:15 AM	34.4755	76.5031	3207.62	24	638038	3.81591e+06
F1	F	11-16-18 5:30 AM	34.4755	76.5031	3200.22	24.5	638037	3.81591e+06
F1	F	11-16-18 5:45 AM	34.4754	76.5029	3206.7	25.5	638022	3.8159e+06
F1	F	11-16-18 6:00 AM	34.4755	76.5032	3211.34	29.5	638041	3.81591e+06
F1	F	11-16-18 6:15 AM	34.4756	76.5031	3203.66	30.5	638038	3.81591e+06
F1	F	11-16-18 6:30 AM	34.4755	76.5031	3190.26	31	638037	3.81591e+06
F1	F	11-16-18 6:45 AM	34.4755	76.5032	3184.77	31	638042	3.8159e+06
F1	F	11-16-18 7:00 AM	34.4755	76.503	3211.91	32.5	638028	3.8159e+06
F1	F	11-16-18 7:15 AM	34.4755	76.503	3207.47	31.5	638027	3.8159e+06
F1	F	11-16-18 7:30 AM	34.4756	76.5031	3206.76	31	638040	3.81591e+06
F1	F	11-16-18 7:45 AM	34.4757	76.5021	3247.86	25.5	637939	3.81593e+06
F1	F	11-16-18 8:00 AM	34.4759	76.5019	3260.7	24	637924	3.81595e+06
F1	F	11-16-18 8:16 AM	34.4947	76.5	0.25	17	637722	3.81803e+06
F1	F	11-16-18 8:31 AM	34.4755	76.5024	3216.78	12.5	637973	3.81591e+06
F1	F	11-16-18 8:45 AM	34.4758	76.5025	3197.5	15.5	637976	3.81594e+06
F1	F	11-16-18 9:00 AM	34.4758	76.5025	3207.63	20	637981	3.81594e+06
F1	F	11-16-18 9:15 AM	34.4758	76.5025	3203.67	22	637981	3.81594e+06
F1	F	11-16-18 9:30 AM	34.4758	76.5025	3211.41	18	637982	3.81593e+06
F1	F	11-16-18 9:45 AM	34.4757	76.5026	3198.61	18.5	637985	3.81593e+06
F1	F	11-16-18 9:59 AM	34.4746	76.503	3219.26	16	638028	3.81581e+06
F1	F	11-16-18 10:15 AM	34.4724	76.5041	3222.99	9	638133	3.81556e+06
F1	F	11-16-18 10:30 AM	34.4726	76.5041	3190.5	15.5	638134	3.81559e+06
F1	F	11-16-18 10:45 AM	34.4728	76.5034	3232.5	11	638069	3.81561e+06
F1	F	11-16-18 11:00 AM	34.4756	76.502	3185.64	5.5	637932	3.81591e+06
F1	F	11-16-18 11:15 AM	34.4761	76.5022	3134.58	2	637952	3.81597e+06
F1	F	11-16-18 11:30 AM	34.4754	76.4996	3218.98	1	637714	3.81589e+06
F1	F	11-16-18 11:45 AM	34.4754	76.5002	3313.85	4.5	637773	3.81589e+06
F1	F	11-16-18 12:00 PM	34.4756	76.5	3317.83	8.5	637754	3.81591e+06
F1	F	11-16-18 12:15 PM	34.4758	76.5	3214.16	11	637748	3.81594e+06
F1	F	11-16-18 12:30 PM	34.4768	76.5005	3209.65	9	637794	3.81605e+06
F1	F	11-16-18 12:45 PM	34.4785	76.4991	3219.89	3.5	637666	3.81624e+06
F1	F	11-16-18 1:00 PM	34.4799	76.4963	3236.41	0	637401	3.81638e+06
F1	F	11-16-18 1:15 PM	34.4794	76.4954	3198.12	-1	637324	3.81632e+06
F1	F	11-16-18 1:30 PM	34.4781	76.5001	3192.86	-1.5	637754	3.81619e+06
F1	F	11-16-18 1:45 PM	34.4767	76.5013	3205.03	-2	637871	3.81604e+06
F1	F	11-16-18 2:00 PM	34.4719	76.5047	3215.31	-2.5	638185	3.81551e+06
F1	F	11-16-18 2:15 PM	34.4709	76.5022	3290.43	-1	637960	3.8154e+06
F1	F	11-16-18 2:30 PM	34.4691	76.5008	3344.71	-1.5	637831	3.8152e+06
F1	F	11-16-18 2:45 PM	34.4686	76.4998	3407.77	-1.5	637746	3.81513e+06
F1	F	11-16-18 3:00 PM	34.4665	76.4996	3434.44	-1.5	637727	3.81491e+06
F1	F	11-16-18 3:14 PM	34.4698	76.4997	3336.72	-1.5	637736	3.81527e+06
F1	F	11-16-18 3:30 PM	34.4718	76.5046	3213.91	-1.5	638184	3.81549e+06
F1	F	11-16-18 3:45 PM	34.4717	76.5054	3242.04	-2.5	638249	3.81549e+06
F1	F	11-16-18 4:00 PM	34.4726	76.5042	3206.37	0.5	638144	3.81558e+06
F1	F	11-16-18 4:15 PM	34.4725	76.5038	3172.32	12	638100	3.81557e+06
F1	F	11-16-18 4:30 PM	34.4725	76.5039	3226.35	24	638116	3.81557e+06
F1	F	11-16-18 4:45 PM	34.4724	76.5039	3224.27	28.5	638118	3.81557e+06
F1	F	11-16-18 5:00 PM	34.4724	76.504	3255.88	25.5	638121	3.81556e+06
F1	F	11-16-18 5:15 PM	34.4724	76.5039	3234.99	24.5	638117	3.81556e+06
F1	F	11-16-18 5:30 PM	34.4725	76.5039	3218.57	20	638114	3.81557e+06
F1	F	11-16-18 5:45 PM	34.4724	76.5043	3238.64	19	638150	3.81556e+06
F1	F	11-16-18 6:00 PM	34.4728	76.5039	3213.79	6.5	638113	3.81561e+06
F1	F	11-16-18 6:14 PM	34.4756	76.5017	3176.14	0	637910	3.81592e+06
F1	F	11-16-18 6:30 PM	34.4773	76.499	3208.16	-3.5	637658	3.8161e+06
F1	F	11-16-18 6:45 PM	34.4786	76.4965	3208.34	-4.5	637421	3.81624e+06
F1	F	11-16-18 7:00 PM	34.4808	76.4946	3184.6	-5	637242	3.81648e+06
F1	F	11-16-18 7:15 PM	34.4838	76.4919	3194.94	-6	636996	3.81682e+06
F1	F	11-16-18 7:30 PM	34.482	76.4916	3262.24	-4.5	636971	3.81661e+06
F1	F	11-16-18 7:45 PM	34.4797	76.4909	3278.51	-4.5	636909	3.81635e+06
F1	F	11-16-18 8:00 PM	34.4786	76.4925	3271.75	-4	637056	3.81624e+06
F1	F	11-17-18 3:15 AM	34.4755	76.5031	3210.04	33	638036	3.81591e+06
F1	F	11-17-18 3:30 AM	34.4754	76.503	3207.94	34.5	638031	3.8159e+06
F1	F	11-17-18 3:45 AM	34.4755	76.503	3229.31	34.5	638030	3.81591e+06
F1	F	11-17-18 4:00 AM	34.4755	76.5032	3196.33	34.5	638042	3.8159e+06
F1	F	11-17-18 4:15 AM	34.4754	76.5031	3207.64	34	638035	3.81589e+06
F1	F	11-17-18 4:30 AM	34.4754	76.5031	3206.61	28.5	638032	3.81589e+06
F1	F	11-17-18 4:45 AM	34.4755	76.5031	3200.45	27	638037	3.81591e+06
F1	F	11-17-18 5:01 AM	34.4728	76.5096	2804.01	25.5	638633	3.81561e+06
F1	F	11-17-18 5:15 AM	34.4755	76.5031	3207.77	25	638036	3.81591e+06
F1	F	11-17-18 5:30 AM	34.4755	76.5031	3211.56	24	638031	3.81591e+06
F1	F	11-17-18 5:46 AM	34.4755	76.502	3210.46	19.5	637935	3.81591e+06
F1	F	11-17-18 6:01 AM	34.4763	76.5021	3198.89	15.5	637941	3.81599e+06
F1	F	11-17-18 8:15 AM	34.4749	76.5015	3254.93	11.5	637886	3.81584e+06
F1	F	11-17-18 8:31 AM	34.4774	76.5012	2898.06	13	637857	3.81611e+06
F1	F	11-17-18 8:45 AM	34.4772	76.5017	3205.37	15	637900	3.8161e+06
F1	F	11-17-18 9:00 AM	34.4772	76.5016	3207.37	17.5	637896	3.81609e+06
F1	F	11-17-18 9:15 AM	34.4772	76.5016	3223.78	19	637899	3.8161e+06
F1	F	11-17-18 9:30 AM	34.4773	76.5016	3224.7	18.5	637893	3.8161e+06
F1	F	11-17-18 9:45 AM	34.4772	76.5017	3187.33	18	637906	3.81609e+06
F1	F	11-17-18 10:00 AM	34.4771	76.5012	3288.18	18	637855	3.81608e+06
F1	F	11-17-18 10:15 AM	34.4771	76.5016	3219.35	21.5	637898	3.81609e+06
F1	F	11-17-18 10:30 AM	34.4771	76.5017	3190.2	26.5	637907	3.81609e+06
F1	F	11-17-18 10:45 AM	34.4762	76.5015	3221.98	21	637886	3.81599e+06
F1	F	11-17-18 11:01 AM	34.4746	76.5034	3201.76	10	638065	3.81581e+06
F1	F	11-17-18 11:45 AM	34.4731	76.5029	3244.14	2	638020	3.81564e+06
F1	F	11-17-18 12:00 PM	34.4721	76.5039	3191.97	3.5	638114	3.81554e+06
F1	F	11-17-18 12:15 PM	34.4721	76.5039	3199.93	14	638118	3.81552e+06
F1	F	11-17-18 12:31 PM	34.4717	76.5043	3233.81	21	638151	3.81549e+06
F1	F	11-17-18 12:45 PM	34.4752	76.502	3213.05	9	637938	3.81588e+06
F1	F	11-17-18 1:00 PM	34.4784	76.4983	3208.23	2.5	637592	3.81623e+06
F1	F	11-17-18 1:15 PM	34.4774	76.5005	3250.12	0	637794	3.81611e+06
F1	F	11-17-18 1:30 PM	34.4783	76.5	3216.1	0	637745	3.81621e+06
F1	F	11-17-18 1:45 PM	34.4789	76.4985	3199.58	-1	637604	3.81627e+06
F1	F	11-17-18 2:00 PM	34.4781	76.4982	3196.26	-1.5	637577	3.81619e+06
F1	F	11-17-18 2:15 PM	35.2046	75.5461	1399.31	-1.5	549707	3.89587e+06
F1	F	11-17-18 2:31 PM	34.4905	76.5307	0.1	0	640543	3.8176e+06
F1	F	11-17-18 2:45 PM	34.472	76.504	3219.11	0	638126	3.81551e+06
F1	F	11-17-18 3:00 PM	34.472	76.5041	3241.35	4	638136	3.81552e+06
F1	F	11-17-18 3:15 PM	34.4701	76.5017	3299.89	2.5	637913	3.8153e+06
F1	F	11-17-18 3:30 PM	34.4695	76.4996	3369.58	1	637724	3.81523e+06
F1	F	11-17-18 3:45 PM	34.4692	76.5005	3376	0	637803	3.8152e+06
F1	F	11-17-18 4:00 PM	34.4712	76.5028	3283.04	0.5	638014	3.81543e+06
F1	F	11-17-18 4:16 PM	34.4714	76.5039	3229.14	1	638115	3.81545e+06
F1	F	11-17-18 4:30 PM	34.4707	76.502	3299.52	0.5	637941	3.81537e+06
F1	F	11-17-18 4:45 PM	34.4721	76.5043	3224.47	0.5	638156	3.81553e+06
F1	F	11-17-18 5:00 PM	34.4741	76.5032	3202.7	7	638046	3.81575e+06
F1	F	11-17-18 5:15 PM	34.4741	76.5032	3220.11	16.5	638045	3.81575e+06
F1	F	11-17-18 5:30 PM	34.4741	76.5031	3206.96	23.5	638042	3.81576e+06
F1	F	11-17-18 5:45 PM	34.4742	76.5032	3210.2	25.5	638047	3.81576e+06
F1	F	11-17-18 6:00 PM	34.4757	76.5027	3182.45	17	638002	3.81593e+06
F1	F	11-17-18 6:15 PM	34.4781	76.5001	3189.92	6.5	637758	3.81619e+06
F1	F	11-17-18 6:30 PM	34.4799	76.4951	3047.09	2	637295	3.81639e+06
F1	F	11-17-18 6:45 PM	34.4787	76.4956	3166.45	0.5	637342	3.81625e+06
F1	F	11-17-18 7:00 PM	34.4775	76.4983	3245.46	0	637588	3.81612e+06
F1	F	11-17-18 7:15 PM	34.4766	76.499	3198.31	0	637661	3.81602e+06
F1	F	11-17-18 7:30 PM	34.4782	76.5003	3204.5	0	637769	3.8162e+06
F1	F	11-17-18 7:45 PM	34.4776	76.5009	3203.39	0	637834	3.81614e+06
F1	F	11-17-18 8:00 PM	34.4767	76.5016	3191.34	0	637898	3.81603e+06
F1	F	11-17-18 8:15 PM	34.4753	76.5016	3205.61	0.5	637894	3.81588e+06
F1	F	11-17-18 8:30 PM	34.4754	76.5015	3181.55	4.5	637893	3.81589e+06
F1	F	11-17-18 8:46 PM	34.4753	76.5015	3200.07	7.5	637888	3.81588e+06
F1	F	11-17-18 9:00 PM	34.476	76.5022	3235.28	6.5	637955	3.81596e+06
F1	F	11-17-18 9:15 PM	34.4756	76.5022	3188.29	5	637956	3.81591e+06
F1	F	11-17-18 9:30 PM	34.4754	76.5023	3205.61	6.5	637959	3.8159e+06
F1	F	11-17-18 9:45 PM	34.4755	76.5022	3229.55	15	637953	3.81591e+06
F1	F	11-17-18 10:00 PM	34.4755	76.5024	3201.41	15	637968	3.81591e+06
F1	F	11-17-18 10:15 PM	34.4756	76.5024	3205.28	15	637969	3.81591e+06
F1	F	11-17-18 10:30 PM	34.4756	76.5023	3205.44	14.5	637963	3.81592e+06
F1	F	11-17-18 10:45 PM	34.4737	76.5035	3308.4	9.5	638078	3.81571e+06
F1	F	11-17-18 11:01 PM	34.4729	76.504	3214.98	5	638121	3.81561e+06
F1	F	11-17-18 11:15 PM	34.4726	76.5041	3210.64	3	638136	3.81559e+06
F1	F	11-17-18 11:30 PM	34.4724	76.5048	3212.1	1	638194	3.81556e+06
F1	F	11-17-18 11:45 PM	34.4736	76.5043	3241.86	0	638145	3.8157e+06
F1	F	11-18-18 12:00 AM	34.474	76.5027	3230.72	0.5	637999	3.81573e+06
F1	F	11-18-18 12:15 AM	34.4768	76.5016	3225.93	-0.5	637896	3.81605e+06
F1	F	11-18-18 12:30 AM	34.4779	76.4999	3203.58	-0.5	637740	3.81617e+06
F1	F	11-18-18 12:45 AM	34.4786	76.4987	3284.11	0	637630	3.81624e+06
F1	F	11-18-18 1:01 AM	34.4786	76.4986	3207.95	2	637613	3.81624e+06
F1	F	11-18-18 1:15 AM	34.4787	76.4966	3197.34	0	637434	3.81625e+06
F1	F	11-18-18 1:30 AM	34.4785	76.4992	3209.01	0	637672	3.81623e+06
F1	F	11-18-18 1:45 AM	34.4786	76.4995	3205.66	2.5	637696	3.81624e+06
F1	F	11-18-18 2:00 AM	34.4787	76.4994	3188.65	8.5	637689	3.81625e+06
F1	F	11-18-18 2:15 AM	34.4785	76.4994	3224.03	13	637693	3.81624e+06
F1	F	11-18-18 2:30 AM	34.4785	76.4994	3233.79	15	637694	3.81624e+06
F1	F	11-18-18 2:46 AM	34.4786	76.5002	2814.32	18.5	637763	3.81624e+06
F1	F	11-18-18 3:00 AM	34.4786	76.4993	3209.47	20	637685	3.81624e+06
F1	F	11-18-18 3:16 AM	34.4786	76.4993	3190.61	22.5	637681	3.81624e+06
F1	F	11-18-18 3:30 AM	34.4786	76.4994	3200.78	24	637689	3.81624e+06
F1	F	11-18-18 3:45 AM	34.4785	76.4994	3180.33	23.5	637694	3.81623e+06
F1	F	11-18-18 4:00 AM	34.4787	76.4993	3243.9	26.5	637678	3.81626e+06
F1	F	11-18-18 4:15 AM	34.4786	76.4993	3219.74	29.5	637678	3.81625e+06
F1	F	11-18-18 4:30 AM	34.4786	76.4993	3204.8	30	637685	3.81624e+06
F1	F	11-18-18 4:45 AM	34.4785	76.4993	3219.21	32.5	637682	3.81624e+06
F1	F	11-18-18 5:00 AM	34.4786	76.4993	3203.31	34	637681	3.81624e+06
F1	F	11-18-18 5:15 AM	34.4786	76.4994	3202.72	34.5	637687	3.81625e+06
F1	F	11-18-18 5:30 AM	34.4785	76.4995	3230.34	35	637696	3.81624e+06
F1	F	11-18-18 5:45 AM	34.4785	76.4995	3214.24	33.5	637699	3.81623e+06
F1	F	11-18-18 6:00 AM	34.479	76.4995	3259.66	32	637701	3.81629e+06
F1	F	11-18-18 6:15 AM	34.4786	76.4995	3203.34	30	637698	3.81625e+06
F1	F	11-18-18 6:31 AM	34.4819	76.4971	2711.51	29.5	637475	3.81661e+06
F1	F	11-18-18 6:46 AM	34.4786	76.4994	3195.54	29	637689	3.81624e+06
F1	F	11-18-18 7:00 AM	34.4786	76.4994	3211.16	27	637688	3.81625e+06
F1	F	11-18-18 7:15 AM	34.4784	76.4995	3194.52	27	637698	3.81623e+06
F1	F	11-18-18 7:30 AM	34.4787	76.4994	3217.52	25.5	637692	3.81625e+06
F1	F	11-18-18 7:45 AM	34.479	76.4977	3187.33	22.5	637533	3.81629e+06
F1	F	11-18-18 8:00 AM	34.4803	76.4955	3177.76	22.5	637331	3.81643e+06
F1	F	11-18-18 8:15 AM	34.4808	76.4945	3106.64	22.5	637242	3.81648e+06
F1	F	11-18-18 8:30 AM	34.4804	76.4947	3212.26	35	637255	3.81643e+06
F1	F	11-18-18 8:45 AM	34.4803	76.495	3192.65	33.5	637287	3.81643e+06
F1	F	11-18-18 9:01 AM	34.4802	76.4958	3199.6	28.5	637359	3.81642e+06
F1	F	11-18-18 9:15 AM	34.4803	76.4951	3205.99	25.5	637293	3.81642e+06
F1	F	11-18-18 9:30 AM	34.4802	76.4951	3202.59	29.5	637293	3.81642e+06
F1	F	11-18-18 9:45 AM	34.4803	76.495	3202.42	32	637288	3.81642e+06
F1	F	11-18-18 10:00 AM	34.4805	76.4947	3149.43	32	637260	3.81644e+06
F1	F	11-18-18 10:15 AM	34.4802	76.495	3212.78	26	637283	3.81642e+06
F1	F	11-18-18 10:30 AM	34.4803	76.495	3196.29	23	637288	3.81643e+06
F1	F	11-18-18 10:45 AM	34.4804	76.4951	3213.54	26.5	637292	3.81643e+06
F1	F	11-18-18 11:00 AM	34.4803	76.4951	3208.31	28.5	637291	3.81642e+06
F1	F	11-18-18 11:15 AM	34.4803	76.4951	3191.14	29	637289	3.81643e+06
F1	F	11-18-18 11:30 AM	34.48	76.4948	3174.81	25	637267	3.81639e+06
F1	F	11-18-18 11:45 AM	34.4799	76.4949	3202.52	23	637278	3.81639e+06
F1	F	11-18-18 12:00 PM	34.4801	76.4949	3199.5	23	637276	3.8164e+06
F1	F	11-18-18 12:15 PM	34.4801	76.495	3206.32	22	637283	3.8164e+06
F1	F	11-18-18 12:30 PM	34.4776	76.4993	3241.15	11	637681	3.81613e+06
F1	F	11-18-18 12:45 PM	34.476	76.5028	3203.83	6	638011	3.81596e+06
F1	F	11-18-18 1:00 PM	34.4729	76.5037	3205.82	3.5	638096	3.81562e+06
F1	F	11-18-18 1:16 PM	34.4722	76.5039	3228.12	3	638112	3.81554e+06
F1	F	11-18-18 1:30 PM	34.4755	76.5017	3259.6	3	637906	3.81591e+06
F1	F	11-18-18 1:45 PM	34.4764	76.4994	3197.22	2	637691	3.816e+06
F1	F	11-18-18 2:00 PM	34.478	76.5009	3212.5	0	637829	3.81618e+06
F1	F	11-18-18 2:16 PM	34.477	76.4983	3207.72	1	637591	3.81607e+06
F1	F	11-18-18 2:30 PM	34.4759	76.4991	3241.7	1	637665	3.81594e+06
F1	F	11-18-18 2:44 PM	34.4753	76.4991	3241.94	1	637671	3.81587e+06
F1	F	11-18-18 3:00 PM	34.474	76.5023	3232.26	2	637966	3.81574e+06
F1	F	11-18-18 3:15 PM	34.4716	76.5035	3241	2	638081	3.81548e+06
F1	F	11-18-18 3:30 PM	34.4721	76.5038	3202.04	5.5	638108	3.81553e+06
F1	F	11-18-18 3:45 PM	34.472	76.5041	3237.13	9	638129	3.81552e+06
F1	F	11-18-18 4:00 PM	34.472	76.504	3219.17	12	638124	3.81552e+06
F1	F	11-18-18 4:14 PM	34.4721	76.5041	3216.27	14.5	638129	3.81553e+06
F1	F	11-18-18 4:30 PM	34.4721	76.5041	3196.39	16.5	638131	3.81553e+06
F1	F	11-18-18 4:45 PM	34.472	76.5041	3228.06	18	638132	3.81552e+06
F1	F	11-18-18 4:59 PM	34.472	76.5041	3237.17	22	638130	3.81552e+06
F1	F	11-18-18 5:15 PM	34.4713	76.5036	3252.71	17.5	638086	3.81544e+06
F1	F	11-18-18 5:30 PM	34.4706	76.4994	3320.97	6.5	637708	3.81536e+06
F1	F	11-18-18 5:45 PM	34.4713	76.4978	3306.75	3	637552	3.81543e+06
F1	F	11-18-18 6:00 PM	34.4754	76.4954	3291.78	1	637330	3.81588e+06
F1	F	11-18-18 6:15 PM	34.4775	76.4921	3311.37	0.5	637023	3.81611e+06
F1	F	11-18-18 6:30 PM	34.479	76.4933	3265.98	0	637130	3.81628e+06
F1	F	11-18-18 6:45 PM	34.4806	76.4949	3189.36	0	637271	3.81647e+06
F1	F	11-18-18 7:00 PM	34.4807	76.4949	3196.42	1.5	637275	3.81647e+06
F1	F	11-18-18 7:15 PM	34.4807	76.4959	3195.59	1	637368	3.81647e+06
F1	F	11-18-18 7:30 PM	34.4791	76.4975	3194.62	-0.5	637514	3.8163e+06
F1	F	11-18-18 7:45 PM	34.4788	76.4981	3206.5	0.5	637569	3.81627e+06
F1	F	11-18-18 8:00 PM	34.4788	76.498	3196.09	5	637566	3.81627e+06
F1	F	11-18-18 8:15 PM	34.4789	76.4981	3175.35	9.5	637569	3.81627e+06
F1	F	11-18-18 8:30 PM	34.479	76.498	3137.86	11.5	637563	3.81629e+06
F1	F	11-18-18 8:45 PM	34.479	76.4983	3193.78	12.5	637587	3.81629e+06
F1	F	11-18-18 9:00 PM	34.4788	76.4981	3186.33	15	637575	3.81627e+06
F1	F	11-18-18 9:15 PM	34.4788	76.4981	3194.22	16	637574	3.81627e+06
F1	F	11-18-18 9:30 PM	34.4789	76.4978	3244.79	16	637540	3.81627e+06
F1	F	11-18-18 9:45 PM	34.4788	76.4981	3193.77	16	637567	3.81627e+06
F1	F	11-18-18 10:00 PM	34.4788	76.4981	3208.02	16.5	637567	3.81627e+06
F1	F	11-18-18 10:15 PM	34.4788	76.4981	3197.83	18	637567	3.81627e+06
F1	F	11-18-18 10:30 PM	34.4787	76.4982	3183.12	16	637577	3.81626e+06
F1	F	11-18-18 10:45 PM	34.4781	76.4973	3202.37	9.5	637496	3.81619e+06
F1	F	11-18-18 11:00 PM	34.4778	76.4972	3205.94	4.5	637492	3.81616e+06
F1	F	11-18-18 11:16 PM	34.4773	76.4986	3212.73	2.5	637623	3.8161e+06
F1	F	11-18-18 11:30 PM	34.4764	76.5005	3069.88	1	637795	3.816e+06
F1	F	11-18-18 11:46 PM	34.4748	76.5033	3205.61	-1	638055	3.81582e+06
F1	F	11-19-18 12:00 AM	34.475	76.5037	3204.23	-3	638093	3.81585e+06
F1	F	11-19-18 12:15 AM	34.4749	76.5039	3210.08	-1.5	638108	3.81584e+06
F1	F	11-19-18 12:30 AM	34.4736	76.5039	3209.02	-2.5	638116	3.81569e+06
F1	F	11-19-18 12:46 AM	34.474	76.5027	3226.04	0	638001	3.81574e+06
F1	F	11-19-18 1:00 AM	34.4755	76.501	3221.6	-1.5	637843	3.8159e+06
F1	F	11-19-18 1:15 AM	34.4749	76.5031	3233.39	-2.5	638033	3.81584e+06
F1	F	11-19-18 1:30 AM	34.476	76.5011	3205.31	-3.5	637854	3.81595e+06
F1	F	11-19-18 1:45 AM	34.4745	76.5032	3222.69	-0.5	638045	3.8158e+06
F1	F	11-19-18 2:00 AM	34.4744	76.5033	3230.16	9.5	638057	3.81579e+06
F1	F	11-19-18 2:15 AM	34.4805	76.4907	-0.09	12	636887	3.81644e+06
F1	F	11-19-18 2:30 AM	34.4758	76.5025	3253.33	11.5	637975	3.81594e+06
F1	F	11-19-18 2:45 AM	34.4759	76.5025	3245.39	19	637978	3.81595e+06
F1	F	11-19-18 3:00 AM	34.476	76.5026	3252.95	24.5	637987	3.81596e+06
F1	F	11-19-18 3:15 AM	34.4761	76.5023	3214.82	28.5	637960	3.81598e+06
F1	F	11-19-18 3:30 AM	34.4761	76.5023	3215.43	30	637961	3.81597e+06
F1	F	11-19-18 3:45 AM	34.4761	76.5022	3209.89	32.5	637955	3.81597e+06
F1	F	11-19-18 4:00 AM	34.4762	76.5021	3226.24	33	637946	3.81598e+06
F1	F	11-19-18 4:15 AM	34.4761	76.5021	3215.68	29.5	637945	3.81597e+06
F1	F	11-19-18 4:30 AM	34.4761	76.5023	3210.92	25.5	637958	3.81597e+06
F1	F	11-19-18 4:45 AM	34.4761	76.5024	3190.49	19	637967	3.81597e+06
F1	F	11-19-18 5:00 AM	34.4761	76.5022	3214.19	18	637951	3.81597e+06
F1	F	11-19-18 5:31 AM	34.4745	76.5028	3209.62	14.5	638008	3.81579e+06
F1	F	11-19-18 5:46 AM	34.4737	76.503	3219.63	14	638028	3.8157e+06
F1	F	11-19-18 6:00 AM	34.4761	76.5018	3213.11	13	637914	3.81597e+06
F1	F	11-19-18 6:15 AM	34.4744	76.5032	3202.39	13	638050	3.81578e+06
F1	F	11-19-18 6:30 AM	34.4758	76.5018	3194.77	15.5	637911	3.81594e+06
F1	F	11-19-18 6:45 AM	34.4763	76.5015	3207.16	13	637887	3.81599e+06
F1	F	11-19-18 7:00 AM	34.4759	76.5014	3215.31	11	637883	3.81594e+06
F1	F	11-19-18 7:15 AM	34.4744	76.503	3238.54	10	638025	3.81578e+06
F1	F	11-19-18 7:30 AM	34.4724	76.504	3201.68	10.5	638126	3.81556e+06
F1	F	11-19-18 7:45 AM	34.4737	76.5043	3201.12	10	638146	3.8157e+06
F1	F	11-19-18 8:00 AM	34.4861	76.5003	-0.03	13.5	637763	3.81708e+06
F1	F	11-19-18 11:15 AM	34.4802	76.4951	3198.67	24.5	637294	3.81642e+06
F1	F	11-19-18 11:30 AM	34.4804	76.4951	3213.45	23	637292	3.81644e+06
F1	F	11-19-18 11:45 AM	34.4803	76.495	3208.65	22.5	637288	3.81643e+06
F1	F	11-19-18 12:00 PM	34.4804	76.4951	3212.68	21.5	637296	3.81644e+06
F1	F	11-19-18 12:15 PM	34.4804	76.4951	3217.81	24.5	637297	3.81644e+06
F1	F	11-19-18 12:29 PM	34.4805	76.495	3215.74	27.5	637283	3.81644e+06
F1	F	11-19-18 12:45 PM	34.4802	76.4952	3198.06	27.5	637306	3.81641e+06
F1	F	11-19-18 1:00 PM	34.4773	76.5004	3209.34	10	637785	3.8161e+06
F1	F	11-19-18 1:15 PM	34.4751	76.5018	3209.21	4	637919	3.81586e+06
F1	F	11-19-18 1:30 PM	34.472	76.5036	3243.13	1	638090	3.81552e+06
F1	F	11-19-18 1:45 PM	34.472	76.5045	3213.32	1	638174	3.81552e+06
F1	F	11-19-18 2:00 PM	34.4724	76.5039	3237.82	9.5	638117	3.81556e+06
F1	F	11-19-18 2:15 PM	34.4724	76.5039	3223.82	17.5	638112	3.81557e+06
F1	F	11-19-18 2:30 PM	34.4725	76.5039	3224.5	22.5	638118	3.81557e+06
F1	F	11-19-18 2:45 PM	34.4723	76.5038	3197.24	26.5	638103	3.81555e+06
F1	F	11-19-18 3:00 PM	34.4725	76.504	3251.34	25	638121	3.81558e+06
F1	F	11-19-18 3:14 PM	34.4723	76.5039	3194.71	22.5	638112	3.81555e+06
F1	F	11-19-18 3:30 PM	34.4725	76.5039	3205.28	19.5	638109	3.81557e+06
F1	F	11-19-18 3:45 PM	34.4725	76.5039	3204.09	19	638111	3.81557e+06
F1	F	11-19-18 4:00 PM	34.4725	76.5039	3220.17	19	638114	3.81557e+06
F1	F	11-19-18 4:14 PM	34.4724	76.5043	3248.82	19	638152	3.81556e+06
F1	F	11-19-18 4:30 PM	34.4725	76.5039	3217.63	18	638113	3.81557e+06
F1	F	11-19-18 4:45 PM	34.4724	76.5039	3223.86	17	638113	3.81557e+06
F1	F	11-19-18 5:00 PM	34.4724	76.5039	3236.55	16	638116	3.81556e+06
F1	F	11-19-18 5:15 PM	34.4725	76.5039	3217.23	14.5	638118	3.81557e+06
F1	F	11-19-18 5:30 PM	34.4724	76.5039	3224.91	14.5	638110	3.81556e+06
F1	F	11-19-18 5:45 PM	34.4749	76.5039	3206.15	7	638112	3.81584e+06
F1	F	11-19-18 6:00 PM	34.4753	76.5044	3211.32	3	638153	3.81588e+06
F1	F	11-19-18 6:16 PM	34.4775	76.503	2672.1	2	638023	3.81613e+06
F1	F	11-19-18 6:30 PM	34.4759	76.4989	3218.63	1.5	637650	3.81595e+06
F1	F	11-19-18 6:45 PM	34.4753	76.5007	3227.56	2	637819	3.81588e+06
F1	F	11-19-18 7:00 PM	34.4754	76.5009	3262.83	2.5	637837	3.81589e+06
F1	F	11-19-18 7:15 PM	34.4745	76.5023	3219.87	3	637968	3.81579e+06
F1	F	11-19-18 7:30 PM	34.4755	76.5036	3203.33	1.5	638077	3.81591e+06
F1	F	11-19-18 7:45 PM	34.4756	76.5023	3195.8	1.5	637966	3.81592e+06
F1	F	11-19-18 8:00 PM	34.4757	76.5023	3205.54	3	637960	3.81593e+06
F1	F	11-19-18 8:15 PM	34.4754	76.5023	3180.52	4.5	637967	3.8159e+06
F1	F	11-19-18 8:30 PM	34.4757	76.5024	3206.23	7.5	637966	3.81593e+06
F1	F	11-19-18 8:45 PM	34.4756	76.5022	3210.52	9.5	637956	3.81592e+06
F1	F	11-19-18 8:59 PM	34.4756	76.5022	3237.53	10	637951	3.81592e+06
F1	F	11-19-18 9:14 PM	34.4755	76.5022	3190.37	15	637957	3.81591e+06
F1	F	11-19-18 9:30 PM	34.4758	76.502	3215.64	17	637935	3.81594e+06
F1	F	11-19-18 9:45 PM	34.4761	76.4998	3212.5	6.5	637733	3.81597e+06
F1	F	11-19-18 10:00 PM	34.4771	76.5018	3223.06	2.5	637917	3.81609e+06
F1	F	11-19-18 10:15 PM	34.4758	76.5034	3202.9	0.5	638062	3.81594e+06
F1	F	11-19-18 10:30 PM	34.4719	76.504	3200.57	-0.5	638127	3.8155e+06
F1	F	11-19-18 10:45 PM	34.4724	76.5032	3281.68	1	638046	3.81556e+06
F1	F	11-19-18 11:00 PM	34.4748	76.5009	3288.52	1	637839	3.81583e+06
F1	F	11-20-18 1:45 PM	34.475	76.5015	3195.88	7	637888	3.81584e+06
F1	F	11-20-18 2:00 PM	34.4736	76.5027	3236.61	4.5	638006	3.81569e+06
F1	F	11-20-18 2:14 PM	34.4719	76.5035	3176.02	3.5	638077	3.8155e+06
F1	F	11-20-18 2:30 PM	34.4711	76.5025	3293.43	2.5	637987	3.81542e+06
F1	F	11-20-18 2:45 PM	34.4694	76.5026	3313.59	1.5	637996	3.81523e+06
F1	F	11-20-18 3:00 PM	34.4678	76.5016	3358.42	0.5	637908	3.81505e+06
F1	F	11-20-18 3:15 PM	34.4695	76.4986	3341.57	0.5	637629	3.81524e+06
F1	F	11-20-18 3:30 PM	34.4694	76.4984	3355.71	1.5	637610	3.81522e+06
F1	F	11-20-18 3:45 PM	34.4693	76.4959	3330.72	1.5	637382	3.8152e+06
F1	F	11-20-18 4:00 PM	34.4709	76.4965	3373.56	1	637438	3.81538e+06
F1	F	11-20-18 4:15 PM	34.4707	76.4971	3346.98	4.5	637494	3.81536e+06
F1	F	11-20-18 4:30 PM	34.4706	76.4973	3332.77	8.5	637508	3.81535e+06
F1	F	11-20-18 4:45 PM	34.4707	76.497	3331.45	11.5	637481	3.81536e+06
F1	F	11-20-18 5:00 PM	34.4707	76.4968	3324.72	13	637463	3.81536e+06
F1	F	11-20-18 5:15 PM	34.4707	76.4967	3309.38	14.5	637452	3.81536e+06
F1	F	11-20-18 5:31 PM	34.4707	76.497	3325.02	15.5	637485	3.81536e+06
F1	F	11-20-18 5:45 PM	34.4707	76.4974	3313.76	19	637516	3.81537e+06
F1	F	11-20-18 6:00 PM	34.4707	76.4974	3317.37	23.5	637522	3.81537e+06
F1	F	11-20-18 6:15 PM	34.4707	76.4973	3304.09	27.5	637515	3.81537e+06
F1	F	11-20-18 6:30 PM	34.4707	76.4974	3352.35	30	637521	3.81537e+06
F1	F	11-20-18 6:45 PM	34.4708	76.4972	3285.72	31.5	637505	3.81537e+06
F1	F	11-20-18 7:00 PM	34.4708	76.4973	3301.45	32.5	637514	3.81537e+06
F1	F	11-20-18 7:15 PM	34.4704	76.4975	3290.59	28	637530	3.81534e+06
F1	F	11-20-18 7:30 PM	34.472	76.5	3324.13	11	637753	3.81551e+06
F1	F	11-20-18 7:45 PM	34.4721	76.503	3280.68	3.5	638028	3.81553e+06
F1	F	11-21-18 4:00 AM	34.4762	76.5023	3216.36	16	637965	3.81598e+06
F1	F	11-21-18 4:15 AM	34.476	76.5024	3233.82	18.5	637968	3.81596e+06
F1	F	11-21-18 4:30 AM	34.4758	76.5027	3233.25	20.5	637997	3.81594e+06
F1	F	11-21-18 4:45 AM	34.4758	76.5027	3213.4	27	638003	3.81594e+06
F1	F	11-21-18 5:00 AM	34.4758	76.5028	3196.41	33	638003	3.81594e+06
F1	F	11-21-18 5:15 AM	34.4758	76.5026	3212.92	33.5	637992	3.81594e+06
F1	F	11-21-18 5:30 AM	34.4759	76.5027	3215.2	33.5	638002	3.81595e+06
F1	F	11-21-18 5:46 AM	34.3363	76.5296	-0.41	33	640698	3.80051e+06
F1	F	11-21-18 6:00 AM	34.4759	76.5027	3215.73	33.5	637998	3.81595e+06
F1	F	11-21-18 6:15 AM	34.4759	76.5027	3211.24	33.5	637999	3.81595e+06
F1	F	11-21-18 6:30 AM	34.4759	76.5027	3204.82	32.5	638000	3.81594e+06
F1	F	11-21-18 6:45 AM	34.4758	76.5028	3204.71	31.5	638004	3.81594e+06
F1	F	11-21-18 7:00 AM	34.4759	76.5027	3212.94	28.5	637999	3.81595e+06
F1	F	11-21-18 7:14 AM	34.476	76.5016	3218.65	25	637898	3.81595e+06
F1	F	11-21-18 7:30 AM	34.4761	76.5002	3223.65	14.5	637770	3.81596e+06
F1	F	11-21-18 7:46 AM	34.4892	76.4965	7.8	14.5	637410	3.81741e+06
F1	F	11-21-18 8:00 AM	34.4759	76.503	3208.7	12	638024	3.81595e+06
F1	F	11-21-18 8:15 AM	34.4762	76.5024	3215.17	16.5	637966	3.81599e+06
F1	F	11-21-18 8:30 AM	34.4754	76.5018	3209.79	28	637913	3.81589e+06
F1	F	11-21-18 8:45 AM	34.4728	76.5038	3199.38	16.5	638106	3.81561e+06
F1	F	11-21-18 9:00 AM	34.4736	76.5029	3265.77	12.5	638020	3.8157e+06
F1	F	11-21-18 9:15 AM	34.4758	76.5003	3217.55	9.5	637776	3.81594e+06
F1	F	11-21-18 9:30 AM	34.4759	76.5006	3217.17	10	637801	3.81595e+06
F1	F	11-21-18 9:45 AM	34.4774	76.5008	3210.65	10.5	637825	3.81611e+06
F1	F	11-21-18 10:00 AM	34.4751	76.5027	3224.69	9.5	637995	3.81586e+06
F1	F	11-21-18 10:15 AM	34.4756	76.5032	3212.23	8	638040	3.81592e+06
F1	F	11-21-18 10:30 AM	34.4755	76.5031	3201.91	11.5	638040	3.8159e+06
F1	F	11-21-18 10:45 AM	34.4755	76.503	3213.22	20	638030	3.8159e+06
F1	F	11-21-18 11:00 AM	34.4755	76.503	3217.76	25	638027	3.8159e+06
F1	F	11-21-18 11:15 AM	34.4753	76.5031	3201.09	27.5	638033	3.81589e+06
F1	F	11-21-18 11:30 AM	34.4756	76.5032	3234.81	23.5	638048	3.81592e+06
F1	F	11-21-18 11:45 AM	34.4754	76.5033	3198.76	23.5	638050	3.81589e+06
F1	F	11-21-18 12:00 PM	34.4754	76.5031	3205.56	23.5	638034	3.8159e+06
F1	F	11-21-18 12:15 PM	34.4756	76.5023	3258.58	23	637964	3.81591e+06
F1	F	11-21-18 12:30 PM	34.4756	76.5031	3212.82	22.5	638035	3.81591e+06
F1	F	11-21-18 12:45 PM	34.4755	76.5031	3194.6	18.5	638038	3.81591e+06
F1	F	11-21-18 1:00 PM	34.4755	76.5034	3199.78	15	638066	3.81591e+06
F1	F	11-21-18 1:15 PM	34.4772	76.5004	3206.13	6	637787	3.81609e+06
F1	F	11-21-18 1:30 PM	34.4792	76.4978	3200.86	1.5	637547	3.81631e+06
F1	F	11-21-18 1:46 PM	34.4814	76.4939	3196.57	0.5	637179	3.81655e+06
F1	F	11-21-18 2:00 PM	34.479	76.4956	3183.07	0	637337	3.81628e+06
F1	F	11-21-18 2:15 PM	34.478	76.4973	3195.53	-0.5	637495	3.81617e+06
F1	F	11-21-18 2:30 PM	34.4766	76.4992	3192.87	0	637677	3.81602e+06
F1	F	11-21-18 2:45 PM	34.4756	76.4988	3258.33	0	637638	3.81591e+06
F1	F	11-21-18 3:00 PM	34.474	76.4999	3301.97	0.5	637748	3.81573e+06
F1	F	11-21-18 3:15 PM	34.474	76.4999	3278.99	0.5	637748	3.81574e+06
F1	F	11-21-18 3:30 PM	34.4743	76.5011	3284.32	0.5	637858	3.81577e+06
F1	F	11-21-18 3:45 PM	34.4713	76.502	3289.49	0	637940	3.81543e+06
F1	F	11-21-18 4:01 PM	34.4718	76.4996	2711.22	12	637721	3.81549e+06
F1	F	11-21-18 4:15 PM	34.4714	76.5031	3257.58	22	638044	3.81545e+06
F1	F	11-21-18 4:30 PM	34.4714	76.5029	3352.97	27.5	638028	3.81545e+06
F1	F	11-21-18 4:45 PM	34.4711	76.5031	3254.38	29.5	638046	3.81541e+06
F1	F	11-21-18 5:00 PM	34.4707	76.5009	3324.2	12.5	637841	3.81537e+06
F1	F	11-21-18 5:15 PM	34.4706	76.4979	3311.42	6	637562	3.81536e+06
F1	F	11-21-18 5:30 PM	34.4733	76.5017	3304	2	637908	3.81566e+06
F1	F	11-21-18 5:45 PM	34.4723	76.5043	3226.66	0.5	638150	3.81555e+06
F1	F	11-21-18 7:16 PM	34.521	76.4868	0.04	16	636463	3.82093e+06
F1	F	11-21-18 7:31 PM	34.5351	76.4792	0.08	22.5	635740	3.82248e+06
F1	F	11-22-18 1:46 AM	34.4824	76.4993	0.08	25.5	637671	3.81667e+06
F1	F	11-22-18 2:16 AM	34.4733	76.5018	2733.11	12.5	637919	3.81566e+06
F1	F	11-22-18 2:31 AM	34.4738	76.5034	3193.92	5	638064	3.81571e+06
F1	F	11-22-18 2:45 AM	34.4736	76.5033	3220.85	1.5	638056	3.8157e+06
F1	F	11-22-18 3:00 AM	34.4736	76.5033	3224.39	2.5	638057	3.8157e+06
F1	F	11-22-18 3:16 AM	34.4704	76.5014	2158.6	5	637889	3.81534e+06
F1	F	11-22-18 3:46 AM	34.4735	76.5033	3223.89	8	638053	3.81568e+06
F1	F	11-22-18 4:00 AM	34.4735	76.5033	3197.15	8	638059	3.81569e+06
F1	F	11-22-18 4:15 AM	34.476	76.5022	3208.81	7	637953	3.81596e+06
F1	F	11-22-18 4:30 AM	34.4762	76.5023	3195.95	15.5	637958	3.81598e+06
F1	F	11-22-18 4:45 AM	34.4761	76.5023	3224.39	18.5	637964	3.81597e+06
F1	F	11-22-18 5:00 AM	34.476	76.5023	3227.75	19.5	637963	3.81596e+06
F1	F	11-22-18 5:15 AM	34.476	76.5024	3218.34	25	637966	3.81596e+06
F1	F	11-22-18 5:30 AM	34.4762	76.5023	3218.49	29.5	637964	3.81598e+06
F1	F	11-22-18 5:45 AM	34.4761	76.5023	3218.31	32.5	637962	3.81597e+06
F1	F	11-22-18 6:00 AM	34.4761	76.5023	3214.25	32	637963	3.81598e+06
F1	F	11-22-18 6:15 AM	34.476	76.5023	3205.18	28	637966	3.81596e+06
F1	F	11-22-18 6:30 AM	34.4761	76.5024	3210.35	27	637971	3.81597e+06
F1	F	11-22-18 6:45 AM	34.476	76.5023	3215.76	25.5	637964	3.81596e+06
F1	F	11-22-18 7:00 AM	34.476	76.5024	3210.75	24.5	637966	3.81596e+06
F1	F	11-22-18 7:15 AM	34.476	76.5024	3207.38	25.5	637970	3.81596e+06
F1	F	11-22-18 7:30 AM	34.4761	76.5024	3209.31	26	637970	3.81597e+06
F1	F	11-22-18 7:45 AM	34.4761	76.5024	3206.44	27.5	637969	3.81597e+06
F1	F	11-22-18 8:00 AM	34.476	76.5024	3199.09	28.5	637966	3.81596e+06
F1	F	11-22-18 8:15 AM	34.4763	76.502	3214.1	29.5	637936	3.81599e+06
F1	F	11-22-18 8:30 AM	34.4759	76.5003	3257.08	18	637780	3.81594e+06
F1	F	11-22-18 8:45 AM	34.479	76.4977	3205.2	15.5	637538	3.81628e+06
F1	F	11-22-18 9:00 AM	34.4792	76.4969	3236.18	18.5	637456	3.8163e+06
F1	F	11-22-18 9:15 AM	34.4798	76.4959	3197.83	18.5	637370	3.81637e+06
F1	F	11-22-18 9:30 AM	34.4802	76.495	3198.98	19	637287	3.81642e+06
F1	F	11-22-18 9:45 AM	34.4802	76.4951	3198.17	27.5	637290	3.81642e+06
F1	F	11-22-18 10:00 AM	34.4803	76.4951	3206.89	31.5	637293	3.81643e+06
F1	F	11-22-18 10:15 AM	34.4803	76.4951	3193.63	34.5	637293	3.81642e+06
F1	F	11-22-18 10:30 AM	34.4803	76.495	3215.31	35	637287	3.81642e+06
F1	F	11-22-18 10:45 AM	34.4804	76.4951	3188.11	35	637290	3.81644e+06
F1	F	11-22-18 11:00 AM	34.4803	76.4951	3207.27	35	637291	3.81643e+06
F1	F	11-22-18 11:15 AM	34.4803	76.4951	3205.74	29	637296	3.81643e+06
F1	F	11-22-18 11:30 AM	34.4782	76.4962	3182.35	16	637398	3.8162e+06
F1	F	11-22-18 11:45 AM	34.4785	76.4991	3215.02	9	637666	3.81624e+06
F1	F	11-22-18 12:00 PM	34.4772	76.5005	3199.63	4.5	637795	3.81609e+06
F1	F	11-22-18 12:15 PM	34.4767	76.5018	3214.27	3	637912	3.81604e+06
F1	F	11-22-18 12:30 PM	34.4735	76.5033	3234.78	1	638056	3.81568e+06
F1	F	11-22-18 12:45 PM	34.4722	76.5039	3232.05	1.5	638110	3.81554e+06
F1	F	11-22-18 1:00 PM	34.4721	76.5041	3221.25	4.5	638135	3.81552e+06
F1	F	11-22-18 1:15 PM	34.4723	76.5044	3219.81	5.5	638165	3.81555e+06
F1	F	11-22-18 1:30 PM	34.4715	76.5036	3242.6	4	638085	3.81546e+06
F1	F	11-22-18 1:45 PM	34.471	76.502	3289.8	3.5	637939	3.8154e+06
F1	F	11-22-18 2:00 PM	34.4708	76.4994	3312.91	3.5	637704	3.81538e+06
F1	F	11-22-18 2:15 PM	34.4704	76.4973	3326.57	3.5	637513	3.81534e+06
F1	F	11-22-18 2:30 PM	34.4705	76.4972	3327.57	9	637499	3.81535e+06
F1	F	11-22-18 2:45 PM	34.4717	76.4812	0.26	14	636026	3.81546e+06
F1	F	11-22-18 3:01 PM	34.4641	76.4967	0.22	17	637467	3.81464e+06
F1	F	11-22-18 3:16 PM	34.4663	76.5052	2867.11	18	638246	3.81488e+06
F1	F	11-22-18 3:31 PM	34.4707	76.497	3332.64	19	637479	3.81536e+06
F1	F	11-22-18 3:45 PM	34.4706	76.4972	3359.7	21	637501	3.81535e+06
F1	F	11-22-18 4:00 PM	34.4707	76.497	3343.53	22	637483	3.81536e+06
F1	F	11-22-18 4:15 PM	34.4706	76.4972	3373.4	22.5	637498	3.81535e+06
F1	F	11-22-18 4:30 PM	34.4709	76.4967	3376.67	26.5	637452	3.81538e+06
F1	F	11-22-18 5:16 PM	34.4702	76.495	3186.66	32.5	637300	3.81531e+06
F1	F	11-22-18 5:31 PM	34.4439	76.3563	-0.27	34	624602	3.81221e+06
F1	F	11-22-18 6:01 PM	34.473	76.4746	0.04	32	635425	3.81558e+06
F1	F	11-22-18 6:16 PM	34.472	76.4895	2318.2	29	636790	3.8155e+06
F1	F	11-22-18 6:30 PM	34.4798	76.4663	0	27	634652	3.81633e+06
F1	F	11-22-18 6:46 PM	34.4707	76.4962	3283.82	25.5	637409	3.81536e+06
F1	F	11-22-18 7:46 PM	34.4707	76.497	3335.13	22	637482	3.81536e+06
F1	F	11-22-18 8:01 PM	34.4706	76.497	3338.37	21	637487	3.81536e+06
F1	F	11-22-18 8:15 PM	34.4723	76.4991	3337.77	11.5	637674	3.81554e+06
F1	F	11-22-18 8:30 PM	34.4777	76.4993	3206.3	4	637685	3.81614e+06
F1	F	11-22-18 8:45 PM	34.4783	76.5001	3193.14	0.5	637752	3.81621e+06
F1	F	11-22-18 9:00 PM	34.4776	76.5008	3230.29	-1.5	637820	3.81614e+06
F1	F	11-22-18 9:15 PM	34.4755	76.503	3203.55	-3.5	638029	3.81591e+06
F1	F	11-22-18 9:30 PM	34.4754	76.5031	3178.52	7.5	638035	3.81589e+06
F1	F	11-22-18 9:45 PM	34.4755	76.503	3199.8	12.5	638022	3.8159e+06
F1	F	11-22-18 10:01 PM	34.4759	76.5028	3200.58	19	638012	3.81595e+06
F1	F	11-22-18 10:16 PM	34.4751	76.5048	3074.41	23.5	638193	3.81586e+06
F1	F	11-22-18 10:30 PM	34.4755	76.503	3208.99	25	638026	3.81591e+06
F1	F	11-22-18 10:45 PM	34.4755	76.503	3208.36	27.5	638030	3.81591e+06
F1	F	11-22-18 11:00 PM	34.4754	76.5029	3210.85	27.5	638021	3.81589e+06
F1	F	11-22-18 11:16 PM	34.4755	76.503	3187.48	24.5	638023	3.8159e+06
F1	F	11-22-18 11:30 PM	34.4755	76.5031	3213.17	21.5	638032	3.81591e+06
F1	F	11-22-18 11:45 PM	34.4755	76.5031	3213.48	21	638037	3.81591e+06
F1	F	11-23-18 12:00 AM	34.4757	76.5033	3222.37	21.5	638055	3.81593e+06
F1	F	11-23-18 12:15 AM	34.4758	76.5033	3239.12	21.5	638054	3.81594e+06
F1	F	11-23-18 12:31 AM	34.4755	76.503	3218.98	22	638029	3.81591e+06
F1	F	11-23-18 12:45 AM	34.4755	76.5031	3207.6	19	638031	3.8159e+06
F1	F	11-23-18 1:00 AM	34.4755	76.503	3183.55	18.5	638027	3.8159e+06
F1	F	11-23-18 1:15 AM	34.4755	76.5031	3208.39	18.5	638034	3.8159e+06
F1	F	11-23-18 1:30 AM	34.4754	76.5032	3228.24	19	638041	3.8159e+06
F1	F	11-23-18 1:45 AM	34.4754	76.5032	3211.72	18.5	638042	3.8159e+06
F1	F	11-23-18 2:00 AM	34.4754	76.5032	3225.83	19.5	638041	3.81589e+06
F1	F	11-23-18 2:15 AM	34.4755	76.503	3197.46	20	638029	3.81591e+06
F1	F	11-23-18 2:30 AM	34.4755	76.5031	3215.05	19	638034	3.8159e+06
F1	F	11-23-18 2:45 AM	34.4755	76.5031	3223.54	19	638033	3.81591e+06
F1	F	11-23-18 3:01 AM	34.4754	76.5031	3206.69	18.5	638034	3.8159e+06
F1	F	11-23-18 3:15 AM	34.4754	76.5031	3203.49	19	638033	3.81589e+06
F1	F	11-23-18 3:30 AM	34.4755	76.5032	3207.28	20	638041	3.8159e+06
F1	F	11-23-18 3:45 AM	34.4754	76.503	3221.4	22.5	638027	3.8159e+06
F1	F	11-23-18 4:00 AM	34.4755	76.503	3183.77	27	638030	3.8159e+06
F1	F	11-23-18 4:15 AM	34.4756	76.5031	3172.7	30.5	638037	3.81592e+06
F1	F	11-23-18 4:30 AM	34.4755	76.503	3214.98	32	638028	3.8159e+06
F1	F	11-23-18 4:45 AM	34.475	76.502	3216.42	22	637937	3.81585e+06
F1	F	11-23-18 5:00 AM	34.475	76.5015	3170.88	15.5	637886	3.81585e+06
F1	F	11-23-18 5:16 AM	34.4753	76.5015	3205.01	14	637890	3.81588e+06
F1	F	11-23-18 5:30 AM	34.4762	76.501	3226.91	12.5	637843	3.81598e+06
F1	F	11-23-18 5:45 AM	34.4743	76.5028	3205.07	10	638014	3.81577e+06
F1	F	11-23-18 6:00 AM	34.4724	76.5042	3223.33	10.5	638143	3.81557e+06
F1	F	11-23-18 6:15 AM	34.4725	76.5042	3212.19	12	638142	3.81558e+06
F1	F	11-23-18 6:30 AM	34.4715	76.504	3244.58	16.5	638125	3.81546e+06
F1	F	11-23-18 6:45 AM	34.4749	76.5023	3177.19	15.5	637966	3.81584e+06
F1	F	11-23-18 7:00 AM	34.4752	76.5017	3226.94	22.5	637911	3.81587e+06
F1	F	11-23-18 7:15 AM	34.4753	76.5019	3223.82	21.5	637922	3.81588e+06
F1	F	11-23-18 7:30 AM	34.476	76.5023	3214.78	17.5	637961	3.81596e+06
F1	F	11-23-18 7:45 AM	34.4773	76.4996	3214.75	20	637713	3.8161e+06
F1	F	11-23-18 8:00 AM	34.479	76.4966	3205.78	19	637435	3.81628e+06
F1	F	11-23-18 8:15 AM	34.4809	76.4948	3194.38	18.5	637262	3.81649e+06
F1	F	11-23-18 8:30 AM	34.4787	76.4963	3198.31	14.5	637403	3.81625e+06
F1	F	11-23-18 8:45 AM	34.479	76.4977	3204.71	11.5	637531	3.81629e+06
F1	F	11-23-18 9:00 AM	34.479	76.4982	3205.8	15.5	637578	3.81629e+06
F1	F	11-23-18 9:15 AM	34.479	76.4982	3194.01	21	637577	3.81628e+06
F1	F	11-23-18 9:30 AM	34.4789	76.4982	3198.58	22.5	637579	3.81628e+06
F1	F	11-23-18 9:45 AM	34.4789	76.4981	3207.8	23	637574	3.81628e+06
F1	F	11-23-18 10:00 AM	34.4793	76.4981	3223.62	23.5	637569	3.81632e+06
F1	F	11-23-18 10:15 AM	34.4786	76.4985	3198.29	19	637609	3.81624e+06
F1	F	11-23-18 10:30 AM	34.4782	76.4973	3202.48	11	637503	3.8162e+06
F1	F	11-23-18 10:45 AM	34.4773	76.5004	3207.94	7.5	637780	3.8161e+06
F1	F	11-23-18 11:00 AM	34.4759	76.503	3206.94	4	638025	3.81595e+06
F1	F	11-23-18 11:15 AM	34.4737	76.5028	3243.56	3	638013	3.81571e+06
F1	F	11-23-18 11:30 AM	34.4737	76.5028	3230.91	5.5	638014	3.8157e+06
F1	F	11-23-18 11:45 AM	34.4754	76.5003	3216.27	5	637782	3.81589e+06
F1	F	11-23-18 12:00 PM	34.4759	76.4999	3213.61	5.5	637742	3.81595e+06
F1	F	11-23-18 12:15 PM	34.476	76.4998	3212.26	9	637736	3.81595e+06
F1	F	11-23-18 12:31 PM	34.4773	76.5019	3208.17	4	637922	3.8161e+06
F1	F	11-23-18 12:45 PM	34.4761	76.4999	3207.11	0.5	637737	3.81597e+06
F1	F	11-23-18 1:00 PM	34.4756	76.5013	3210.61	1	637869	3.81591e+06
F1	F	11-23-18 1:15 PM	34.4761	76.5026	3213.22	1	637985	3.81597e+06
F1	F	11-23-18 1:30 PM	34.4761	76.5026	3206.9	1.5	637985	3.81597e+06
F1	F	11-23-18 1:45 PM	34.4753	76.5029	3238.47	1	638020	3.81589e+06
F1	F	11-23-18 2:00 PM	34.4719	76.5047	3221.01	-1	638189	3.81551e+06
F1	F	11-23-18 2:15 PM	34.4717	76.5027	3273.39	0	638001	3.81549e+06
F1	F	11-23-18 2:30 PM	34.4733	76.5004	3290.61	1	637792	3.81566e+06
F1	F	11-23-18 2:45 PM	34.4748	76.4981	3070.51	1	637581	3.81583e+06
F1	F	11-23-18 3:00 PM	34.4757	76.4985	3250.03	1	637608	3.81593e+06
F1	F	11-23-18 3:15 PM	34.4759	76.4982	3235.52	1.5	637589	3.81594e+06
F1	F	11-23-18 3:30 PM	34.4781	76.4994	3219.95	0	637690	3.81619e+06
F1	F	11-23-18 3:45 PM	34.4776	76.5006	3202.46	-1.5	637805	3.81614e+06
F1	F	11-23-18 4:00 PM	34.478	76.5	3201.89	-2.5	637750	3.81618e+06
F1	F	11-23-18 4:15 PM	34.4751	76.5013	3188.68	-4	637870	3.81586e+06
F1	F	11-23-18 4:30 PM	34.4757	76.5024	3186.3	2	637970	3.81592e+06
F1	F	11-23-18 4:45 PM	34.4755	76.503	3215.49	14.5	638030	3.81591e+06
F1	F	11-23-18 5:00 PM	34.4755	76.5031	3203.77	20	638032	3.81591e+06
F1	F	11-23-18 5:15 PM	34.4755	76.5031	3202.19	22	638038	3.81591e+06
F1	F	11-23-18 5:30 PM	34.4755	76.5031	3195.59	23.5	638037	3.8159e+06
F1	F	11-23-18 5:45 PM	34.4755	76.5031	3215.57	25	638032	3.8159e+06
F1	F	11-23-18 6:00 PM	34.4755	76.5031	3204.36	24.5	638039	3.81591e+06
F1	F	11-23-18 6:15 PM	34.4754	76.503	3198.87	23	638031	3.8159e+06
F1	F	11-23-18 6:30 PM	34.4754	76.503	3206.57	22.5	638031	3.8159e+06
F1	F	11-23-18 6:45 PM	34.4754	76.5031	3211.41	17.5	638036	3.8159e+06
F1	F	11-23-18 7:00 PM	34.4755	76.5031	3203.71	16.5	638036	3.8159e+06
F1	F	11-23-18 7:15 PM	34.4755	76.5031	3200.69	15.5	638037	3.8159e+06
F1	F	11-23-18 7:30 PM	34.4754	76.5031	3194.24	15	638034	3.8159e+06
F1	F	11-23-18 7:45 PM	34.4755	76.5032	3194.99	15.5	638046	3.8159e+06
F1	F	11-23-18 8:00 PM	34.4755	76.5029	3183.44	15.5	638017	3.81591e+06
F1	F	11-23-18 8:15 PM	34.4755	76.5031	3204.57	16	638035	3.81591e+06
F1	F	11-23-18 8:30 PM	34.4755	76.5031	3207.83	15.5	638031	3.81591e+06
F1	F	11-23-18 8:45 PM	34.4755	76.5031	3202.07	15	638035	3.8159e+06
F1	F	11-23-18 9:00 PM	34.4752	76.503	3180.12	19	638026	3.81587e+06
F1	F	11-23-18 9:15 PM	34.4753	76.5031	3213.07	25	638035	3.81588e+06
F1	F	11-23-18 9:30 PM	34.4751	76.5032	3188.93	30	638045	3.81586e+06
F1	F	11-23-18 9:45 PM	34.4753	76.503	3267.11	31.5	638022	3.81588e+06
F1	F	11-23-18 10:00 PM	34.4757	76.5029	3179.04	32.5	638018	3.81592e+06
F1	F	11-23-18 10:15 PM	34.4755	76.503	3211.16	33.5	638026	3.81591e+06
F1	F	11-23-18 10:30 PM	34.4754	76.5031	3197.38	33	638040	3.8159e+06
F1	F	11-23-18 10:45 PM	34.4754	76.5032	3193.22	33	638041	3.8159e+06
F1	F	11-23-18 11:00 PM	34.4754	76.5031	3186.46	32	638032	3.81589e+06
F1	F	11-23-18 11:15 PM	34.4755	76.503	3212.57	31.5	638027	3.81591e+06
F1	F	11-23-18 11:30 PM	34.4754	76.5027	3235.47	30	637999	3.81589e+06
F1	F	11-23-18 11:45 PM	34.4754	76.503	3205.53	29.5	638030	3.8159e+06
F1	F	11-24-18 12:00 AM	34.4755	76.5031	3205.84	24.5	638036	3.8159e+06
F1	F	11-24-18 12:15 AM	34.4757	76.5032	3219.59	23	638040	3.81592e+06
F1	F	11-24-18 12:30 AM	34.4757	76.503	3279.68	22	638025	3.81593e+06
F1	F	11-24-18 12:45 AM	34.4755	76.5031	3201.08	21	638033	3.8159e+06
F1	F	11-24-18 1:00 AM	34.4755	76.5032	3230.13	20	638040	3.81591e+06
F1	F	11-24-18 1:15 AM	34.4754	76.5032	3232.67	18.5	638042	3.8159e+06
F1	F	11-24-18 1:30 AM	34.4756	76.503	3211.59	17.5	638022	3.81592e+06
F1	F	11-24-18 1:45 AM	34.4755	76.5031	3206.88	16.5	638033	3.81591e+06
F1	F	11-24-18 2:00 AM	34.4755	76.5031	3206.41	15.5	638036	3.8159e+06
F1	F	11-24-18 2:15 AM	34.4755	76.5032	3220.21	16	638042	3.81591e+06
F1	F	11-24-18 2:30 AM	34.4755	76.5031	3194.31	16	638040	3.8159e+06
F1	F	11-24-18 2:45 AM	34.4754	76.5031	3216.79	13.5	638035	3.8159e+06
F1	F	11-24-18 3:00 AM	34.4757	76.5024	3205.73	13.5	637975	3.81592e+06
F1	F	11-24-18 8:15 PM	34.4755	76.5032	3203.68	28	638045	3.81591e+06
F1	F	11-24-18 8:30 PM	34.4755	76.5031	3215.43	31.5	638031	3.81591e+06
F1	F	11-24-18 8:45 PM	34.4754	76.5031	3202.78	32.5	638033	3.8159e+06
F1	F	11-24-18 9:00 PM	34.4755	76.5031	3216.25	33.5	638039	3.81591e+06
F1	F	11-24-18 9:15 PM	34.4754	76.5031	3206.5	35	638035	3.8159e+06
F1	F	11-24-18 9:30 PM	34.4755	76.503	3230.22	35.5	638027	3.81591e+06
F1	F	11-24-18 9:45 PM	34.4755	76.5031	3205.41	35.5	638036	3.8159e+06
F1	F	11-24-18 10:00 PM	34.4755	76.5031	3210.19	29.5	638034	3.81591e+06
F1	F	11-24-18 10:15 PM	34.4755	76.503	3207.24	25.5	638027	3.81591e+06
F1	F	11-24-18 10:30 PM	34.4755	76.503	3211.43	23	638030	3.8159e+06
F1	F	11-24-18 10:45 PM	34.4755	76.5031	3197.38	22.5	638040	3.8159e+06
F1	F	11-24-18 11:00 PM	34.4754	76.5031	3199.27	21.5	638039	3.8159e+06
F1	F	11-24-18 11:15 PM	34.4754	76.5031	3199.15	20.5	638032	3.81589e+06
F1	F	11-24-18 11:31 PM	34.4754	76.5031	3199.68	24	638031	3.8159e+06
F1	F	11-24-18 11:45 PM	34.4755	76.5031	3204.67	27	638032	3.8159e+06
F1	F	11-25-18 12:00 AM	34.4754	76.503	3197.61	30	638027	3.8159e+06
F1	F	11-25-18 12:15 AM	34.4757	76.5031	3260.77	27.5	638032	3.81593e+06
F1	F	11-25-18 12:31 AM	34.4755	76.503	3208.55	26	638029	3.8159e+06
F1	F	11-25-18 12:45 AM	34.4756	76.503	3241.36	24.5	638025	3.81591e+06
F1	F	11-25-18 1:00 AM	34.4755	76.503	3204.4	23.5	638030	3.8159e+06
F1	F	11-25-18 1:16 AM	34.4763	76.5026	3021.31	20	637989	3.81599e+06
F1	F	11-25-18 1:30 AM	34.4755	76.5031	3212.91	19.5	638037	3.8159e+06
F1	F	11-25-18 1:45 AM	34.4755	76.503	3229.75	19	638026	3.8159e+06
F1	F	11-25-18 2:00 AM	34.4755	76.5031	3247.89	18.5	638036	3.81591e+06
F1	F	11-25-18 2:15 AM	34.4755	76.5031	3198.85	18.5	638037	3.81591e+06
F1	F	11-25-18 2:30 AM	34.4755	76.5031	3201.83	18	638035	3.81591e+06
F1	F	11-25-18 2:45 AM	34.4755	76.503	3200.34	18.5	638031	3.8159e+06
F1	F	11-25-18 3:00 AM	34.4755	76.5031	3198.75	18.5	638037	3.81591e+06
F1	F	11-25-18 3:15 AM	34.4755	76.5031	3214.43	18	638035	3.8159e+06
F1	F	11-25-18 3:30 AM	34.4755	76.5032	3188.43	21.5	638047	3.8159e+06
F1	F	11-25-18 3:45 AM	34.4755	76.5031	3198.61	26.5	638037	3.8159e+06
F1	F	11-25-18 4:00 AM	34.4755	76.5031	3217.69	29.5	638034	3.81591e+06
F1	F	11-25-18 4:15 AM	34.4755	76.503	3204.18	32	638024	3.8159e+06
F1	F	11-25-18 4:30 AM	34.4755	76.503	3208.13	31.5	638027	3.81591e+06
F1	F	11-25-18 4:45 AM	34.4755	76.503	3208.74	30.5	638028	3.81591e+06
F1	F	11-25-18 5:00 AM	34.4755	76.503	3199.72	31	638029	3.81591e+06
F1	F	11-25-18 5:16 AM	34.4755	76.5032	3201.62	32.5	638041	3.81591e+06
F1	F	11-25-18 5:30 AM	34.4755	76.5031	3204.01	31.5	638032	3.8159e+06
F1	F	11-25-18 5:45 AM	34.4753	76.5031	3193.9	29	638038	3.81588e+06
F1	F	11-25-18 6:00 AM	34.4755	76.5032	3225.78	28	638042	3.81591e+06
F1	F	11-25-18 6:15 AM	34.4755	76.5031	3209.46	26.5	638039	3.81591e+06
F1	F	11-25-18 6:30 AM	34.4754	76.5031	3191.45	26.5	638036	3.8159e+06
F1	F	11-25-18 6:45 AM	34.4758	76.5028	3203.48	24	638007	3.81594e+06
F1	F	11-25-18 7:00 AM	34.4758	76.503	3183.17	26	638023	3.81594e+06
F1	F	11-25-18 7:15 AM	34.4765	76.5019	3214.94	23.5	637924	3.81602e+06
F1	F	11-25-18 7:30 AM	34.4774	76.5017	3208.47	20	637905	3.81611e+06
F1	F	11-25-18 7:45 AM	34.4761	76.5023	3207.45	18.5	637963	3.81597e+06
F1	F	11-25-18 8:00 AM	34.4761	76.5023	3196.04	22.5	637960	3.81597e+06
F1	F	11-25-18 8:15 AM	34.4761	76.5023	3209.74	28	637957	3.81597e+06
F1	F	11-25-18 8:30 AM	34.4754	76.5027	3204.13	21	638000	3.81589e+06
F1	F	11-25-18 8:45 AM	34.475	76.5024	3200.66	17	637975	3.81584e+06
F1	F	11-25-18 9:00 AM	34.4727	76.5039	3235.74	12.5	638112	3.8156e+06
F1	F	11-25-18 9:15 AM	34.4724	76.5041	3216.65	13	638136	3.81556e+06
F1	F	11-25-18 9:30 AM	34.4724	76.5041	3213.96	15	638137	3.81556e+06
F1	F	11-25-18 9:45 AM	34.4725	76.5042	3226.2	14.5	638144	3.81557e+06
F1	F	11-25-18 10:00 AM	34.4719	76.5037	3233.12	15	638092	3.8155e+06
F1	F	11-25-18 10:15 AM	34.471	76.5023	3241.95	11.5	637973	3.81541e+06
F1	F	11-25-18 10:30 AM	34.4706	76.5012	3306.23	9.5	637865	3.81536e+06
F1	F	11-25-18 10:45 AM	34.471	76.4983	3294.49	7.5	637603	3.8154e+06
F1	F	11-25-18 11:01 AM	34.4774	76.4972	3216.77	7.5	637487	3.81611e+06
F1	F	11-25-18 11:15 AM	34.4793	76.4977	3197.48	5.5	637531	3.81631e+06
F1	F	11-25-18 11:30 AM	34.4789	76.4984	3197.19	13	637597	3.81628e+06
F1	F	11-25-18 11:45 AM	34.4789	76.4984	3214.5	21	637600	3.81628e+06
F1	F	11-25-18 12:00 PM	34.4788	76.4984	3206.22	26	637596	3.81626e+06
F1	F	11-25-18 12:15 PM	34.4772	76.5004	3200.8	13.5	637784	3.81609e+06
F1	F	11-25-18 12:30 PM	34.4772	76.502	3190.38	7	637935	3.81609e+06
F1	F	11-25-18 12:45 PM	34.4755	76.5016	3285.22	4	637896	3.8159e+06
F1	F	11-25-18 1:30 PM	34.472	76.5041	3218.99	3.5	638135	3.81551e+06
F1	F	11-25-18 1:45 PM	34.472	76.5041	3221.88	6.5	638130	3.81551e+06
F1	F	11-25-18 2:00 PM	34.4727	76.5043	3200.45	4	638149	3.81559e+06
F1	F	11-25-18 2:15 PM	34.4717	76.5052	3215.18	0	638239	3.81548e+06
F1	F	11-25-18 2:30 PM	34.4717	76.5053	3209.6	0	638241	3.81549e+06
F1	F	11-25-18 2:45 PM	34.4717	76.5053	3211.19	0	638245	3.81549e+06
F1	F	11-25-18 3:00 PM	34.4717	76.5053	3223.7	-0.5	638243	3.81549e+06
F1	F	11-25-18 3:15 PM	34.4724	76.5024	3280.93	1	637980	3.81556e+06
F1	F	11-25-18 3:30 PM	34.473	76.5044	3203.33	1.5	638157	3.81563e+06
F1	F	11-25-18 3:45 PM	34.4731	76.5043	3212.08	-1	638151	3.81564e+06
F1	F	11-25-18 4:00 PM	34.4725	76.5039	3184.68	0.5	638113	3.81558e+06
F1	F	11-25-18 4:15 PM	34.4724	76.5039	3221.68	5	638115	3.81557e+06
F1	F	11-25-18 4:30 PM	34.4725	76.5039	3217.31	7.5	638110	3.81557e+06
F1	F	11-25-18 4:45 PM	34.4725	76.5039	3206.29	11.5	638116	3.81558e+06
F1	F	11-25-18 5:00 PM	34.4725	76.504	3226.38	14	638120	3.81557e+06
F1	F	11-25-18 5:15 PM	34.4725	76.504	3232.41	14	638124	3.81557e+06
F1	F	11-25-18 5:30 PM	34.4725	76.5039	3220.46	14.5	638113	3.81557e+06
F1	F	11-25-18 5:45 PM	34.4725	76.5039	3211.77	14.5	638114	3.81558e+06
F1	F	11-25-18 6:01 PM	34.4732	76.4985	2465.1	15.5	637618	3.81565e+06
F1	F	11-25-18 6:15 PM	34.4724	76.504	3213.48	21	638127	3.81556e+06
F1	F	11-25-18 6:30 PM	34.4724	76.504	3235.64	24.5	638119	3.81557e+06
F1	F	11-25-18 6:45 PM	34.4724	76.5039	3249.77	27	638112	3.81557e+06
F1	F	11-25-18 7:00 PM	34.4724	76.5038	3230.02	25.5	638107	3.81556e+06
F1	F	11-25-18 7:15 PM	34.4724	76.5041	3233.69	23	638134	3.81556e+06
F1	F	11-25-18 7:30 PM	34.4724	76.5039	3232.1	22.5	638118	3.81557e+06
F1	F	11-25-18 7:45 PM	34.4725	76.504	3221.89	21	638121	3.81557e+06
F1	F	11-25-18 8:00 PM	34.4724	76.5039	3229.15	19	638112	3.81557e+06
F1	F	11-25-18 8:15 PM	34.4724	76.5039	3229.19	18	638113	3.81557e+06
F1	F	11-25-18 8:30 PM	34.4725	76.5038	3210.86	20	638104	3.81557e+06
F1	F	11-25-18 8:45 PM	34.4725	76.5039	3231.02	19.5	638117	3.81557e+06
F1	F	11-25-18 9:00 PM	34.4725	76.5039	3198.32	19	638115	3.81558e+06
F1	F	11-25-18 9:15 PM	34.4725	76.504	3237.6	24.5	638123	3.81558e+06
F1	F	11-25-18 9:30 PM	34.4723	76.504	3249.4	27.5	638124	3.81555e+06
F1	F	11-25-18 9:45 PM	34.4728	76.5035	3159.65	20.5	638078	3.8156e+06
F1	F	11-25-18 10:00 PM	34.4723	76.5039	3234.8	20	638118	3.81556e+06
F1	F	11-25-18 10:16 PM	34.4739	76.504	3149.02	20.5	638118	3.81573e+06
F1	F	11-25-18 10:31 PM	34.472	76.5045	3228.03	11	638167	3.81552e+06
F1	F	11-25-18 10:45 PM	34.4715	76.5044	3189.86	4.5	638157	3.81547e+06
F1	F	11-25-18 11:01 PM	34.4713	76.5046	3186.82	2	638177	3.81544e+06
F1	F	11-25-18 11:15 PM	34.4722	76.5052	3251.38	-2.5	638231	3.81554e+06
F1	F	11-25-18 11:30 PM	34.4716	76.5053	3208.42	-2.5	638240	3.81548e+06
F1	F	11-25-18 11:46 PM	34.4728	76.5052	2899.12	-3.5	638237	3.8156e+06
F1	F	11-26-18 12:01 AM	34.4759	76.5025	53.98	-5.5	637984	3.81595e+06
F1	F	11-26-18 12:15 AM	34.4767	76.5001	3189.73	-6.5	637759	3.81603e+06
F1	F	11-26-18 12:30 AM	34.4755	76.5031	3211.98	-3	638033	3.81591e+06
F1	F	11-26-18 12:45 AM	34.4755	76.5031	3211.14	11.5	638032	3.8159e+06
F1	F	11-26-18 1:00 AM	34.4755	76.503	3216.05	18	638030	3.81591e+06
F1	F	11-26-18 1:16 AM	34.4754	76.503	3232.59	18.5	638026	3.8159e+06
F1	F	11-26-18 1:30 AM	34.4754	76.503	3187.42	18.5	638027	3.8159e+06
F1	F	11-26-18 1:45 AM	34.4755	76.5031	3199.47	18.5	638035	3.81591e+06
F1	F	11-26-18 2:00 AM	34.4754	76.5029	3235.11	21	638021	3.81589e+06
F1	F	11-26-18 2:16 AM	34.4755	76.5031	3202.81	23.5	638037	3.81591e+06
F1	F	11-26-18 2:30 AM	34.4754	76.503	3190.95	25.5	638031	3.81589e+06
F1	F	11-26-18 2:45 AM	34.4755	76.5031	3222.97	25.5	638036	3.81591e+06
F1	F	11-26-18 3:00 AM	34.4755	76.5031	3215.51	25	638037	3.81591e+06
F1	F	11-26-18 3:16 AM	34.4755	76.5031	3213.07	23	638032	3.81591e+06
F1	F	11-26-18 3:30 AM	34.4754	76.5031	3229.28	20	638039	3.8159e+06
F1	F	11-26-18 3:45 AM	34.4755	76.5031	3203.34	20	638036	3.8159e+06
F1	F	11-26-18 4:00 AM	34.4755	76.503	3204.08	20	638025	3.81591e+06
F1	F	11-26-18 4:15 AM	34.4756	76.5032	3180.13	25	638046	3.81591e+06
F1	F	11-26-18 4:31 AM	34.4755	76.503	3205.76	30	638030	3.8159e+06
F1	F	11-26-18 4:46 AM	34.4755	76.503	3205.44	30	638028	3.8159e+06
F1	F	11-26-18 5:00 AM	34.4756	76.5031	3183.23	28	638037	3.81591e+06
F1	F	11-26-18 5:15 AM	34.4754	76.5031	3204.53	26.5	638034	3.81589e+06
F1	F	11-26-18 5:30 AM	34.4755	76.5031	3209.33	25.5	638035	3.8159e+06
F1	F	11-26-18 5:45 AM	34.4755	76.5032	3210.58	25	638042	3.8159e+06
F1	F	11-26-18 6:01 AM	34.4755	76.503	3214.73	26	638031	3.81591e+06
F1	F	11-26-18 6:15 AM	34.4756	76.503	3258.92	25	638025	3.81592e+06
F1	F	11-26-18 6:30 AM	34.4755	76.5031	3212.65	24	638033	3.8159e+06
F1	F	11-26-18 6:45 AM	34.4755	76.5031	3217.68	25	638037	3.81591e+06
F1	F	11-26-18 7:00 AM	34.4755	76.5032	3225.91	25.5	638043	3.81591e+06
F1	F	11-26-18 7:15 AM	34.4761	76.5032	3166.85	22	638045	3.81597e+06
F1	F	11-26-18 7:30 AM	34.4862	76.4979	878.42	18	637536	3.81708e+06
F1	F	11-26-18 7:46 AM	34.4788	76.5003	2466.97	15	637777	3.81627e+06
F1	F	11-26-18 8:01 AM	34.4756	76.5032	3206.83	16	638048	3.81592e+06
F1	F	11-26-18 8:15 AM	34.4744	76.5027	3212.04	15.5	638003	3.81579e+06
F1	F	11-26-18 8:30 AM	34.4758	76.5027	3190.87	13	637997	3.81594e+06
F1	F	11-26-18 8:45 AM	34.4758	76.5027	3227.89	16.5	638002	3.81594e+06
F1	F	11-26-18 9:00 AM	34.4759	76.5028	3213.82	18	638005	3.81595e+06
F1	F	11-26-18 9:15 AM	34.4757	76.5027	3209.85	22.5	637995	3.81593e+06
[truncated: 26,164 more rows]
